# Supplementary material
Source: publisher figshare collection journal article supplement (https://gsajournals.figshare.com/ndownloader/files/21767268)
Supplement: Supplementary file 1 [file 21767268]

## Sheet: NALM6-log2-fold-change-values
Uniprot ID	Gene symbol	Unique peptides detected	WT log2 fold-change	WT replicate 1 log2 fold-change	WT replicate 2 log2 fold-change	CLPP sh log2 fold-change	CLPP sh replicate 1 log2 fold-change	CLPP sh replicate 2 log2 fold-change	uniprot summary	Aliases and previous symbols	official name
P55212	CASP6	4	-19.64	0.22	-19.87	-1.01	-0.21	-2.1	Involved in the activation cascade of caspases responsible for apoptosis execution. Cleaves poly(ADP-ribose) polymerase in vitro, as well as lamins. Overexpression promotes programmed cell death.	MCH2	caspase 6
Q8N5K1	CISD2	3	-18.37	0.22	-18.59	21.88	21.33	18.89	Regulator of autophagy that contributes to antagonize BECN1-mediated cellular autophagy at the endoplasmic reticulum. Participates in the interaction of BCL2 with BECN1 and is required for BCL2-mediated depression of endoplasmic reticulum Ca(2+) stores during autophagy. Contributes to BIK-initiated autophagy, while it is not involved in BIK-dependent activation of caspases. Involved in life span …	Miner1;ERIS;NAF-1;ZCD2;WFS2	CDGSH iron sulfur domain 2
O75616	ERAL1	3	-17.82	-17.48	-13.94	0	1.77	-2.39	Probable GTPase that plays a role in the mitochondrial ribosomal small subunit assembly. Specifically binds the 12S mitochondrial rRNA (12S mt-rRNA) to a 33 nucleotide section delineating the 3' terminal stem-loop region. May act as a chaperone that protects the 12S mt-rRNA on the 28S mitoribosomal subunit during ribosomal small subunit assembly. {ECO:0000269|PubMed:20430825, ECO:0000269|PubMed:2…	HERA-B	Era like 12S mitochondrial rRNA chaperone 1
Q6P589	TNFAIP8L2	3	-17.64	-16.53	-16.72	-0.94	1.06	-1.93	Acts as a negative regulator of innate and adaptive immunity by maintaining immune homeostasis. Negative regulator of Toll-like receptor and T-cell receptor function. Prevents hyperresponsiveness of the immune system and maintains immune homeostasis. Inhibits JUN/AP1 and NF-kappa-B activation. Promotes Fas-induced apoptosis (By similarity). {ECO:0000250}.	FLJ23467	TNF alpha induced protein 8 like 2
Q8N1F8	STK11IP	4	-17.58	-15.86	-17.17	-2.53	-1.91	-1.94	May regulate STK11/LKB1 function by controlling its subcellular localization. {ECO:0000269|PubMed:11741830}.	LIP1;KIAA1898;LKB1IP;STK11IP1	serine/threonine kinase 11 interacting protein
O75879	GATB	3	-17.3	-14.77	-17.2	0.59	0.33	0.33	Allows the formation of correctly charged Gln-tRNA(Gln) through the transamidation of misacylated Glu-tRNA(Gln) in the mitochondria. The reaction takes place in the presence of glutamine and ATP through an activated gamma-phospho-Glu- tRNA(Gln). {ECO:0000255|HAMAP-Rule:MF 03147, ECO:0000269|PubMed:19805282}.	PET112L;PET112	glutamyl-tRNA amidotransferase subunit B
Q9H000	MKRN2	3	-17.26	0.22	-17.49	-16.27	-15.64	-14.67	E3 ubiquitin ligase catalyzing the covalent attachment of ubiquitin moieties onto substrate proteins. {ECO:0000250}.	RNF62;HSPC070	makorin ring finger protein 2
Q5VST9	OBSCN	4	-17.2	-16.95	-0.25	0.96	-1.46	19.33	NA	NA	NA
Q14191	WRN	3	-16.64	-13.7	-16.63	1.15	0.63	14.85	Multifunctional enzyme that has both magnesium and ATP- dependent DNA-helicase activity and 3'->5' exonuclease activity towards double-stranded DNA with a 5'-overhang. Has no nuclease activity towards single-stranded DNA or blunt-ended double- stranded DNA. Binds preferentially to DNA substrates containing alternate secondary structures, such as replication forks and Holliday junctions. May play …	RECQL2;RECQ3	Werner syndrome RecQ like helicase
O75127	PTCD1	3	-16.32	-10.87	-16.51	3.78	16.67	2.39	Mitochondrial protein implicated in negative regulation of leucine tRNA levels, as well as negative regulation of mitochondria-encoded proteins and COX activity. Affects also the 3'-processing of mitochondrial tRNAs. {ECO:0000269|PubMed:21857155}.	KIAA0632	pentatricopeptide repeat domain 1
Q9UBK8	MTRR	3	-16.19	-15.41	-14.72	-1.15	-14.28	0.08	Involved in the reductive regeneration of cob(I)alamin (vitamin B12) cofactor required for the maintenance of methionine synthase in a functional state. Necessary for utilization of methylgroups from the folate cycle, thereby affecting transgenerational epigenetic inheritance. Folate pathway donates methyl groups necessary for cellular methylation and affects different pathways such as DNA methyl…	cblE	5-methyltetrahydrofolate-homocysteine methyltransferase reductase
Q13416	ORC2	3	-15.7	-15.46	-0.25	-17.17	-17.05	-14.83	Component of the origin recognition complex (ORC) that binds origins of replication. DNA-binding is ATP-dependent. The specific DNA sequences that define origins of replication have not been identified yet. ORC is required to assemble the pre- replication complex necessary to initiate DNA replication. Binds histone H3 and H4 trimethylation marks H3K9me3, H3K20me3 and H4K27me3. Stabilizes LRWD1, b…	ORC2L	origin recognition complex subunit 2
Q53R41	FASTKD1	4	-15.21	-14.97	-0.25	-0.62	0.52	-2.17	Regulates the stability of mitochondrial MT-ND3 mRNA (PubMed:28335001). {ECO:0000269|PubMed:28335001}.	FLJ21901	FAST kinase domains 1
Q96HP4	OXNAD1	3	-15.17	-13.98	-14.34	3.28	2.58	15.53	NA	MGC15763	oxidoreductase NAD binding domain containing 1
Q9H2F5	EPC1	3	-13.75	0.22	-13.98	-0.95	0.68	-4.06	NA	NA	NA
P51946	CCNH	4	-10.73	-10.32	-17.55	-2.75	-3.13	-2.12	Regulates CDK7, the catalytic subunit of the CDK- activating kinase (CAK) enzymatic complex. CAK activates the cyclin-associated kinases CDK1, CDK2, CDK4 and CDK6 by threonine phosphorylation. CAK complexed to the core-TFIIH basal transcription factor activates RNA polymerase II by serine phosphorylation of the repetitive C-terminal domain (CTD) of its large subunit (POLR2A), allowing its escape …	p34;p37;CycH	cyclin H
P52815	MRPL12	6	-8.93	-8.8	-9.02	-1.55	0.03	-2.89	Associates with mitochondrial RNA polymerase to activate transcription. {ECO:0000269|PubMed:22003127}.	MRPL7/L12;MRPL7;RPML12	mitochondrial ribosomal protein L12
Q9UII2	ATP5IF1	6	-7.5	-9.68	-6.89	-0.84	-0.88	-1.19	Endogenous F(1)F(o)-ATPase inhibitor limiting ATP depletion when the mitochondrial membrane potential falls below a threshold and the F(1)F(o)-ATP synthase starts hydrolyzing ATP to pump protons out of the mitochondrial matrix. Required to avoid the consumption of cellular ATP when the F(1)F(o)-ATP synthase enzyme acts as an ATP hydrolase. Indirectly acts as a regulator of heme synthesis in eryth…	ATPI;IP;ATPIP;MGC1167;MGC8898;ATPIF1	ATP synthase inhibitory factor subunit 1
P53365	ARFIP2	3	-7.07	-8.56	-6.59	-1.79	-14.01	12.85	Putative target protein of ADP-ribosylation factor. Involved in membrane ruffling.	POR1	ADP ribosylation factor interacting protein 2
Q9NSK0	KLC4	6	-6.55	-7.25	-6.09	1.79	4.06	-1.02	Kinesin is a microtubule-associated force-producing protein that may play a role in organelle transport. The light chain may function in coupling of cargo to the heavy chain or in the modulation of its ATPase activity (By similarity). {ECO:0000250}.	bA387M24.3;KNSL8	kinesin light chain 4
P20248	CCNA2	3	-6.39	-7.55	-5.24	3.8	3.32	15.67	Cyclin which controls both the G1/S and the G2/M transition phases of the cell cycle. Functions through the formation of specific serine/threonine protein kinase holoenzyme complexes with the cyclin-dependent protein kinases CDK1 or CDK2. The cyclin subunit confers the substrate specificity of these complexes and differentially interacts with and activates CDK1 and CDK2 throughout the cell cycle.…	CCNA;CCN1	cyclin A2
P42785	PRCP	3	-6.23	-5.98	-0.25	1.23	12.44	1.7	Cleaves C-terminal amino acids linked to proline in peptides such as angiotensin II, III and des-Arg9-bradykinin. This cleavage occurs at acidic pH, but enzymatic activity is retained with some substrates at neutral pH.	PCP;HUMPCP	prolylcarboxypeptidase
Q99757	TXN2	3	-6.05	-17.24	-6.13	-3.44	1.86	-19.38	Important for the control of mitochondrial reactive oxygen species homeostasis, apoptosis regulation and cell viability. Possesses a dithiol-reducing activity. {ECO:0000269|PubMed:12032145, ECO:0000269|PubMed:12080052, ECO:0000269|PubMed:26626369}.	MT-TRX	thioredoxin 2
Q96JA1	LRIG1	3	-5.58	-4.23	-17.56	-2.38	-0.02	-1.71	Acts as a feedback negative regulator of signaling by receptor tyrosine kinases, through a mechanism that involves enhancement of receptor ubiquitination and accelerated intracellular degradation. {ECO:0000269|PubMed:15282549}.	LIG-1;DKFZP586O1624;LIG1	leucine rich repeats and immunoglobulin like domains 1
Q8N183	NDUFAF2	6	-5.45	-5.24	-5.66	-3.57	-3.36	-5.93	Acts as a molecular chaperone for mitochondrial complex I assembly (PubMed:16200211). Complex I functions in the transfer of electrons from NADH to the respiratory chain. The immediate electron acceptor for the enzyme is believed to be ubiquinone (PubMed:16200211, PubMed:27626371). {ECO:0000269|PubMed:16200211, ECO:0000269|PubMed:27626371}.	B17.2L;MMTN;mimitin;NDUFA12L	NADH:ubiquinone oxidoreductase complex assembly factor 2
Q8NC60	NOA1	7	-5.29	-4.46	-7.64	-0.54	-0.64	-0.65	Involved in regulation of mitochondrial protein translation and respiration. Plays a role in mitochondria-mediated cell death. May act as a scaffolding protein or stabilizer of respiratory chain supercomplexes. Binds GTP. {ECO:0000269|PubMed:19103604}.	MGC3232;hAtNOS1;hNOA1;MTG3;C4orf14	nitric oxide associated 1
Q9BYD3	MRPL4	4	-5.29	-6.52	-4.24	-0.02	-2.89	1.24	NA	CGI-28	mitochondrial ribosomal protein L4
Q96S82	UBL7	3	-5.28	-16.29	-4.93	0.15	-1.54	1.7	NA	BMSC-UbP;MGC14421	ubiquitin like 7
Q9BU61	NDUFAF3	3	-5.16	-0.35	-21.12	-0.44	-0.27	-0.76	Essential factor for the assembly of mitochondrial NADH:ubiquinone oxidoreductase complex (complex I). {ECO:0000269|PubMed:19463981}.	MGC10527;DKFZP564J0123;E3-3;2P1;C3orf60	NADH:ubiquinone oxidoreductase complex assembly factor 3
Q9Y5U2	TSSC4	4	-5.11	-4.08	-6.95	0.62	3.72	-0.25	NA	NA	tumor suppressing subtransferable candidate 4
Q9BSH4	TACO1	5	-5.07	-5.81	-4.78	-0.51	-0.54	-0.3	Acts as a translational activator of mitochondrially- encoded cytochrome c oxidase 1. {ECO:0000269|PubMed:19503089}.	CCDC44	translational activator of cytochrome c oxidase I
Q9HAV7	GRPEL1	11	-5.07	-5.42	-4.4	-1.22	-0.92	-1.64	Essential component of the PAM complex, a complex required for the translocation of transit peptide-containing proteins from the inner membrane into the mitochondrial matrix in an ATP-dependent manner (By similarity). Seems to control the nucleotide-dependent binding of mitochondrial HSP70 to substrate proteins (PubMed:11311562). {ECO:0000250|UniProtKB:P38523, ECO:0000269|PubMed:11311562}.	FLJ25609;GrpE;hMGE	GrpE like 1, mitochondrial
P49662	CASP4	3	-5.04	-4.17	-6.22	1.02	0.16	17.91	NA	NA	NA
Q96CB9	NSUN4	3	-5.03	-18.08	-3.79	0.2	-2.42	1.52	Involved in mitochondrial ribosome assembly. 5- methylcytosine rRNA methyltransferase that probably is involved in mitochondrial ribosome small subunit (SSU) maturation by methylation of mitochondrial 12S rRNA; the function is independent of MTERFD2/MTERF4 and assembled mitochondrial ribosome large subunit (LSU). Targeted to LSU by MTERFD2/MTERF4 and probably is involved in a final step in riboso…	MGC22960;SHTAP	NOP2/Sun RNA methyltransferase family member 4
Q06609	RAD51	6	-4.98	-4.86	-4.99	-2.82	-18.36	1.76	Plays an important role in homologous strand exchange, a key step in DNA repair through homologous recombination (HR) (PubMed:28575658). Binds to single and double-stranded DNA and exhibits DNA-dependent ATPase activity. Catalyzes the recognition of homology and strand exchange between homologous DNA partners to form a joint molecule between a processed DNA break and the repair template. Binds to…	HsRad51;HsT16930;BRCC5;FANCR;RAD51A;RECA	RAD51 recombinase
Q9Y375	NDUFAF1	3	-4.95	-4.01	-7.11	-2.22	-3.56	-0.91	Chaperone protein involved in the assembly of the mitochondrial NADH:ubiquinone oxidoreductase complex (complex I). {ECO:0000250}.	CIA30;CGI-65	NADH:ubiquinone oxidoreductase complex assembly factor 1
Q96CX6	LRRC58	5	-4.9	-6.01	-3.04	0.07	-1.6	2.2	NA	NA	leucine rich repeat containing 58
Q9P0M9	MRPL27	4	-4.85	-3.4	-17.83	-1	-0.02	-2.15	NA	NA	mitochondrial ribosomal protein L27
Q5JTW2	CEP78	3	-4.68	-5.68	-1.67	-1.16	-1.74	0.43	May be required for efficient PLK4 centrosomal localization and PLK4-induced overduplication of centrioles (PubMed:27246242). May play a role in cilium biogenesis (PubMed:27588451). {ECO:0000269|PubMed:27246242, ECO:0000269|PubMed:27588451}.	FLJ12643;C9orf81	centrosomal protein 78
Q9H6Q4	CIAO3	3	-4.65	-4.88	0.47	-2.81	-3.06	-2.24	Component of the cytosolic iron-sulfur protein assembly (CIA) complex, a multiprotein complex that mediates the incorporation of iron-sulfur cluster into extramitochondrial Fe/S proteins. Seems to negatively regulate the level of HIF1A expression, although this effect could be indirect. {ECO:0000269|PubMed:16956324, ECO:0000269|PubMed:18270200}.	FLJ21988;PRN;HPRN;IOP1;NAR1;NARFL	cytosolic iron-sulfur assembly component 3
O76031	CLPX	14	-4.56	-5.77	-3.9	-0.62	-0.38	-0.86	ATP-dependent specificity component of the Clp protease complex. Hydrolyzes ATP. Targets specific substrates for degradation by the Clp complex (PubMed:11923310, PubMed:22710082). Can perform chaperone functions in the absence of CLPP. Enhances the DNA-binding activity of TFAM and is required for maintaining a normal mitochondrial nucleoid structure (PubMed:22841477). ATP- dependent unfoldase tha…	NA	caseinolytic mitochondrial matrix peptidase chaperone subunit
Q7Z2W9	MRPL21	7	-4.55	-7.59	-3.8	-3.78	-20.46	-2.45	NA	NA	mitochondrial ribosomal protein L21
Q9P032	NDUFAF4	6	-4.55	-5.31	-3.85	-0.56	-0.57	-0.67	Involved in the assembly of mitochondrial NADH:ubiquinone oxidoreductase complex (complex I). May be involved in cell proliferation and survival of hormone-dependent tumor cells. May be a regulator of breast tumor cell invasion. {ECO:0000269|PubMed:14871833, ECO:0000269|PubMed:17001319, ECO:0000269|PubMed:18179882}.	HSPC125;bA22L21.1;My013;HRPAP20;C6orf66	NADH:ubiquinone oxidoreductase complex assembly factor 4
Q9UFN0	NIPSNAP3A	7	-4.38	-5.1	-3.71	-3.52	-3.46	-4.41	NA	DKFZp564D177;FLJ13953;HSPC299;MGC14553	nipsnap homolog 3A
Q15910	EZH2	9	-4.14	-3.33	-5.79	0.76	0.45	0.59	NA	NA	NA
Q96GC5	MRPL48	4	-4.13	-2.88	-6.08	0.36	0.13	0.75	NA	CGI-118	mitochondrial ribosomal protein L48
Q7Z3D6	DGLUCY	6	-4.07	-4.01	-2.42	-2.29	-2.84	-1.18	NA	NA	NA
Q9NX20	MRPL16	3	-4.05	-3.05	-4.52	-2.23	-1.81	-4.84	NA	FLJ20484;PNAS-111	mitochondrial ribosomal protein L16
Q5J8M3	EMC4	3	-4	-1.14	-4.94	-3.02	-0.02	-2.35	May mediate anti-apoptotic activity.	FLJ90746;MGC24415;PIG17;TMEM85	ER membrane protein complex subunit 4
Q9NPF5	DMAP1	4	-4	-1.08	-5.16	1.13	6.68	-4.59	Involved in transcription repression and activation. Its interaction with HDAC2 may provide a mechanism for histone deacetylation in heterochromatin following replication of DNA at late firing origins. Can also repress transcription independently of histone deacetylase activity. May specifically potentiate DAXX- mediated repression of glucocorticoid receptor-dependent transcription. Component of …	DNMAP1;FLJ11543;KIAA1425;DNMTAP1;EAF2;MEAF2;SWC4	DNA methyltransferase 1 associated protein 1
Q14315	FLNC	6	-3.98	-5.71	-0.56	-2.29	-2.21	-2.71	Muscle-specific filamin, which plays a central role in muscle cells, probably by functioning as a large actin-cross- linking protein. May be involved in reorganizing the actin cytoskeleton in response to signaling events, and may also display structural functions at the Z lines in muscle cells. Critical for normal myogenesis and for maintaining the structural integrity of the muscle fibers.	ABP-280;ABPL;FLN2	filamin C
Q92540	SMG7	5	-3.98	-3	-5.15	-1.07	-0.03	-2.5	NA	NA	NA
Q9Y3D9	MRPS23	6	-3.85	-7.87	-2.96	-0.61	-0.33	-1.3	NA	MRP-S23;CGI-138;HSPC329	mitochondrial ribosomal protein S23
Q9BTC8	MTA3	3	-3.7	-3.14	-13.47	4.01	2.92	15.46	Plays a role in maintenance of the normal epithelial architecture through the repression of SNAI1 transcription in a histone deacetylase-dependent manner, and thus the regulation of E-cadherin levels. Contributes to transcriptional repression by BCL6. {ECO:0000269|PubMed:12705869, ECO:0000269|PubMed:15454082}.	KIAA1266	metastasis associated 1 family member 3
Q9BYC9	MRPL20	3	-3.69	-3.16	-4.26	-1.35	-1.31	-2.63	NA	FLJ10024	mitochondrial ribosomal protein L20
Q13112	CHAF1B	10	-3.68	-4.08	-3.31	1.34	2.09	0.68	Complex that is thought to mediate chromatin assembly in DNA replication and DNA repair. Assembles histone octamers onto replicating DNA in vitro. CAF-1 performs the first step of the nucleosome assembly process, bringing newly synthesized histones H3 and H4 to replicating DNA; histones H2A/H2B can bind to this chromatin precursor subsequent to DNA replication to complete the histone octamer. {EC…	CAF1P60;CAF-1;CAF1;CAF1A;MPP7;MPHOSPH7	chromatin assembly factor 1 subunit B
Q8IVS2	MCAT	8	-3.67	-3.83	-3.55	-0.27	-0.5	-0.36	Catalyzes the transfer of a malonyl moiety from malonyl- CoA to the free thiol group of the phosphopantetheine arm of the mitochondrial ACP protein (NDUFAB1). This suggests the existence of the biosynthesis of fatty acids in mitochondria. {ECO:0000269|PubMed:12882974}.	MT;MCT;fabD;FASN2C;NET62;MCT1	malonyl-CoA-acyl carrier protein transacylase
Q6P2P2	PRMT9	5	-3.66	-4.41	-0.09	0.38	0.14	0.67	Arginine methyltransferase that can both catalyze the formation of omega-N monomethylarginine (MMA) and symmetrical dimethylarginine (sDMA). Specifically mediates the symmetrical dimethylation of SF3B2. Involved in the regulation of alternative splicing of pre-mRNA (PubMed:25737013, PubMed:25979344). {ECO:0000269|PubMed:25737013, ECO:0000269|PubMed:25979344}.	FLJ46629;PRMT10	protein arginine methyltransferase 9
P30281	CCND3	6	-3.64	-2.91	-4.32	-0.23	-0.02	-0.89	Regulatory component of the cyclin D3-CDK4 (DC) complex that phosphorylates and inhibits members of the retinoblastoma (RB) protein family including RB1 and regulates the cell-cycle during G(1)/S transition. Phosphorylation of RB1 allows dissociation of the transcription factor E2F from the RB/E2F complex and the subsequent transcription of E2F target genes which are responsible for the progressi…	NA	cyclin D3
Q9H0R6	QRSL1	8	-3.64	-3.79	-3.49	-1.14	-1.04	-1.16	Allows the formation of correctly charged Gln-tRNA(Gln) through the transamidation of misacylated Glu-tRNA(Gln) in the mitochondria. The reaction takes place in the presence of glutamine and ATP through an activated gamma-phospho-Glu- tRNA(Gln). {ECO:0000255|HAMAP-Rule:MF 03150, ECO:0000269|PubMed:19805282}.	GatA;FLJ10989;FLJ12189;DKFZP564C1278;FLJ13447	QRSL1, glutaminyl-tRNA amidotransferase subunit A
Q9BYD6	MRPL1	8	-3.62	-4.37	-3.42	0.46	0.14	0.82	NA	BM022	mitochondrial ribosomal protein L1
P49354	FNTA	4	-3.61	-2.68	-5.06	1.57	-0.59	4.23	Essential subunit of both the farnesyltransferase and the geranylgeranyltransferase complex. Contributes to the transfer of a farnesyl or geranylgeranyl moiety from farnesyl or geranylgeranyl diphosphate to a cysteine at the fourth position from the C-terminus of several proteins having the C-terminal sequence Cys-aliphatic-aliphatic-X. May positively regulate neuromuscular junction development d…	FPTA;PGGT1A;PTAR2	farnesyltransferase, CAAX box, alpha
Q15542	TAF5	5	-3.61	-9.29	-1.7	1.61	7.45	-0.04	TAFs are components of the transcription factor IID (TFIID) complex, PCAF histone acetylase complex and TBP-free TAFII complex (TFTC). TAFs components-TIIFD are essential for mediating regulation of RNA polymerase transcription. TAF5/TAFII100 interacts strongly with the histone H4-related TAF6/TAFII80 and the histone H3-related TAF9/TAFII31, as well as a stable complex comprised of both TAF5/TAFI…	TAFII100;TAF2D	TATA-box binding protein associated factor 5
Q9UMX5	NENF	3	-3.58	-8.53	-2.03	0.52	2.3	-17.54	Acts as a neurotrophic factor in postnatal mature neurons enhancing neuronal survival. Promotes cell proliferation and neurogenesis in undifferentiated neural pro-genitor cells at the embryonic stage and inhibits differentiation of astrocyte. Its neurotrophic activity is exerted via MAPK1/ERK2, MAPK3/ERK1 and AKT1/AKT pathways. Neurotrophic activity is enhanced by binding to heme. Acts also as an…	CIR2;SCIRP10;SPUF	neudesin neurotrophic factor
O60783	MRPS14	4	-3.54	-2.95	-4.65	-0.73	-0.66	-0.75	NA	HSMRPS14	mitochondrial ribosomal protein S14
P50336	PPOX	5	-3.51	-2.54	-4.86	-0.38	0.28	-3.11	Catalyzes the 6-electron oxidation of protoporphyrinogen-IX to form protoporphyrin-IX. {ECO:0000269|PubMed:21048046, ECO:0000269|PubMed:23467411, ECO:0000269|PubMed:7713909}.	PPO;VP	protoporphyrinogen oxidase
Q96CS2	HAUS1	7	-3.4	-2.27	-3.95	0.56	0.42	0.6	Contributes to mitotic spindle assembly, maintenance of centrosome integrity and completion of cytokinesis as part of the HAUS augmin-like complex. {ECO:0000269|PubMed:15082789, ECO:0000269|PubMed:19369198, ECO:0000269|PubMed:19427217}.	HEI-C;HsT1461;FLJ40084;CCDC5	HAUS augmin like complex subunit 1
Q96S94	CCNL2	5	-3.4	-4.12	-0.99	-4.03	-3.07	-3.75	NA	NA	NA
Q9H9J2	MRPL44	5	-3.39	-3.73	-3.12	-2.07	-2.67	-1.17	Component of the 39S subunit of mitochondrial ribosome. May have a function in the assembly/stability of nascent mitochondrial polypeptides exiting the ribosome. {ECO:0000269|PubMed:23315540}.	FLJ12701;FLJ13990	mitochondrial ribosomal protein L44
Q8NCN4	RNF169	3	-3.38	-2.39	-17.39	0.65	5.21	-16.81	Probable E3 ubiquitin-protein ligase that acts as a negative regulator of double-strand breaks (DSBs) repair following DNA damage. Recruited to DSB repair sites by recognizing and binding ubiquitin catalyzed by RNF168 and competes with TP53BP1 and BRCA1 for association with RNF168-modified chromatin, thereby acting as a negative regulator of DSBs repair. E3 ubiquitin- protein ligase activity is n…	KIAA1991	ring finger protein 169
P53634	CTSC	8	-3.34	-1.38	-4.11	-3.36	-3.44	-3.29	NA	NA	NA
Q15654	TRIP6	4	-3.34	4.34	-8.23	4.26	4.61	4.04	NA	NA	NA
P07093	SERPINE2	3	-3.3	-1.56	-3.98	-1.94	-13.67	-0.64	Serine protease inhibitor with activity toward thrombin, trypsin, and urokinase. Promotes neurite extension by inhibiting thrombin. Binds heparin.	PN1;GDN;PNI;nexin;PI7	serpin family E member 2
Q9Y3P8	SIT1	4	-3.29	-0.65	-5.32	0.14	0.77	-1.18	Negatively regulates TCR (T-cell antigen receptor)- mediated signaling in T-cells. Involved in positive selection of T-cells. {ECO:0000269|PubMed:10209036}.	SIT	signaling threshold regulating transmembrane adaptor 1
Q15526	SURF1	3	-3.26	3.44	-3.79	1.36	0.79	2.63	Component of the MITRAC (mitochondrial translation regulation assembly intermediate of cytochrome c oxidase complex) complex, that regulates cytochrome c oxidase assembly. {ECO:0000269|PubMed:24027061, ECO:0000269|PubMed:9843204, ECO:0000305|PubMed:26321642}.	NA	SURF1, cytochrome c oxidase assembly factor
Q16762	TST	10	-3.23	-2.55	-3.66	-2.09	-2.17	-1.83	Formation of iron-sulfur complexes, cyanide detoxification or modification of sulfur-containing enzymes. Other thiol compounds, besides cyanide, can act as sulfur ion acceptors. Also has weak mercaptopyruvate sulfurtransferase (MST) activity (By similarity). Together with MRPL18, acts as a mitochondrial import factor for the cytosolic 5S rRNA. Only the nascent unfolded cytoplasmic form is able to…	RDS	thiosulfate sulfurtransferase
Q12873	CHD3	4	-3.22	-0.93	-3.74	-1.48	-3.91	0.02	Component of the histone deacetylase NuRD complex which participates in the remodeling of chromatin by deacetylating histones. Required for anchoring centrosomal pericentrin in both interphase and mitosis, for spindle organization and centrosome integrity. {ECO:0000269|PubMed:17626165, ECO:0000269|PubMed:9804427}.	Mi-2a;ZFH;Mi2-ALPHA	chromodomain helicase DNA binding protein 3
O43683	BUB1	14	-3.21	-3.35	-3.09	-0.31	-0.02	-1.3	Serine/threonine-protein kinase that performs 2 crucial functions during mitosis: it is essential for spindle-assembly checkpoint signaling and for correct chromosome alignment. Has a key role in the assembly of checkpoint proteins at the kinetochore, being required for the subsequent localization of CENPF, BUB1B, CENPE and MAD2L1. Required for the kinetochore localization of PLK1. Required for c…	hBUB1;BUB1A;BUB1L	BUB1 mitotic checkpoint serine/threonine kinase
Q9Y676	MRPS18B	9	-3.2	-2.95	-3.42	-0.64	-0.59	-0.54	NA	NA	NA
Q96A35	MRPL24	4	-3.19	-6.69	-0.29	-0.27	-0.01	-0.32	NA	NA	NA
Q14BN4	SLMAP	3	-3.18	-2.67	-4.55	1.4	18.89	0.11	NA	NA	NA
P04004	VTN	4	-3.17	-2.14	-6.74	2.14	1.44	18.78	Vitronectin is a cell adhesion and spreading factor found in serum and tissues. Vitronectin interact with glycosaminoglycans and proteoglycans. Is recognized by certain members of the integrin family and serves as a cell-to-substrate adhesion molecule. Inhibitor of the membrane-damaging effect of the terminal cytolytic complement pathway.	VN	vitronectin
Q9NYL2	MAP3K20	11	-3.14	-3.82	0.63	-0.56	-0.65	-0.12	NA	NA	NA
Q6PD74	AAGAB	6	-3.11	-4.42	-0.66	-1.47	-2.17	-0.5	May be involved in endocytic recycling of growth factor receptors such as EGFR. {ECO:0000269|PubMed:23064416}.	FLJ11506;p34	alpha and gamma adaptin binding protein
Q3T8J9	GON4L	3	-3.09	-4.61	-1.26	-0.76	-0.52	-0.8	NA	NA	NA
Q14207	NPAT	3	-3.08	-0.67	-4.55	-3.19	-0.67	-3.02	Required for progression through the G1 and S phases of the cell cycle and for S phase entry. Activates transcription of the histone H2A, histone H2B, histone H3 and histone H4 genes in conjunction with MIZF. Also positively regulates the ATM, MIZF and PRKDC promoters. Transcriptional activation may be accomplished at least in part by the recruitment of the NuA4 histone acetyltransferase (HAT) co…	E14;p220	nuclear protein, coactivator of histone transcription
Q9BSF4	TIMM29	4	-3.08	-3.03	-3.21	2.06	3.14	1.22	Component of the TIM22 complex, a complex that mediates the import and insertion of multi-pass transmembrane proteins into the mitochondrial inner membrane. The TIM22 complex forms a twin- pore translocase that uses the membrane potential as the external driving force. Required for the stability of the TIM22 complex and functions in the assembly of the TIMM22 protein into the TIM22 complex. May f…	C19orf52	translocase of inner mitochondrial membrane 29
Q9Y673	ALG5	3	-3.08	-2.1	-4.52	-0.74	-2.33	1.63	NA	bA421P11.2	ALG5, dolichyl-phosphate beta-glucosyltransferase
P10746	UROS	4	-3.06	-5.55	-2.59	-1.27	-1.31	-2.04	Catalyzes cyclization of the linear tetrapyrrole, hydroxymethylbilane, to the macrocyclic uroporphyrinogen III, the branch point for the various sub-pathways leading to the wide diversity of porphyrins. Porphyrins act as cofactors for a multitude of enzymes that perform a variety of processes within the cell such as methionine synthesis (vitamin B12) or oxygen transport (heme).	NA	uroporphyrinogen III synthase
Q4KMQ1	TPRN	3	-3.02	-13.85	-1.45	1.8	2.48	1.69	NA	FLJ90254;C9orf75;DFNB79	taperin
Q96E11	MRRF	4	-3.02	-3.84	-2.6	0.48	2.59	-0.47	NA	NA	NA
Q9H3K2	GHITM	4	-3.02	-1.62	-20.33	-0.16	-0.33	0.01	Required for the mitochondrial tubular network and cristae organization. Involved in apoptotic release of cytochrome c. {ECO:0000269|PubMed:18417609}.	HSPC282;PTD010;DERP2;My021;TMBIM5	growth hormone inducible transmembrane protein
O95864	FADS2	4	-2.99	-3.19	-1.56	1.93	1.89	-1.61	Component of a lipid metabolic pathway that catalyzes biosynthesis of highly unsaturated fatty acids (HUFA) from precursor essential polyunsaturated fatty acids (PUFA) linoleic acid (LA) (18:2n-6) and alpha-linolenic acid (ALA) (18:3n-3). Catalyzes the first and rate limiting step in this pathway which is the desaturation of LA (18:2n-6) and ALA (18:3n-3) into gamma- linoleic acid (GLA) (18:3n-6)…	FADSD6;D6D;TU13;DES6;SLL0262;LLCDL2	fatty acid desaturase 2
P27540	ARNT	3	-2.96	-5.2	-1.88	-0.71	-1.34	0.16	Required for activity of the Ah (dioxin) receptor. This protein is required for the ligand-binding subunit to translocate from the cytosol to the nucleus after ligand binding. The complex then initiates transcription of genes involved in the activation of PAH procarcinogens. The heterodimer with HIF1A or EPAS1/HIF2A functions as a transcriptional regulator of the adaptive response to hypoxia.	HIF-1beta;bHLHe2	aryl hydrocarbon receptor nuclear translocator
P48059	LIMS1	3	-2.96	-4.16	-2.16	4.42	3.95	11.7	Adapter protein in a cytoplasmic complex linking beta- integrins to the actin cytoskeleton, bridges the complex to cell surface receptor tyrosine kinases and growth factor receptors. Involved in the regulation of cell survival, cell proliferation and cell differentiation.	PINCH;PINCH1	LIM zinc finger domain containing 1
P01023	A2M	3	-2.95	-2.85	-3.08	-1.57	-0.85	-2.73	Is able to inhibit all four classes of proteinases by a unique 'trapping' mechanism. This protein has a peptide stretch, called the 'bait region' which contains specific cleavage sites for different proteinases. When a proteinase cleaves the bait region, a conformational change is induced in the protein which traps the proteinase. The entrapped enzyme remains active against low molecular weight s…	FWP007;S863-7;CPAMD5	alpha-2-macroglobulin
Q9P2D3	HEATR5B	21	-2.95	-4	0.41	0.04	-0.18	0.52	NA	KIAA1414;DKFZp686P15184	HEAT repeat containing 5B
P81877	SSBP2	3	-2.92	-16.92	-1.9	-2.75	-2.33	-2.82	NA	NA	NA
Q9NX07	TRNAU1AP	3	-2.91	-2.87	-3	-0.63	0.99	-1.05	Involved in the early steps of selenocysteine biosynthesis and tRNA(Sec) charging to the later steps resulting in the cotranslational incorporation of selenocysteine into selenoproteins. Stabilizes the SECISBP2, EEFSEC and tRNA(Sec) complex. May be involved in the methylation of tRNA(Sec). Enhances efficiency of selenoproteins synthesis (By similarity). {ECO:0000250, ECO:0000269|PubMed:16508009}.	SECP43;FLJ20503;TRSPAP1	tRNA selenocysteine 1 associated protein 1
Q9BW83	IFT27	6	-2.88	-0.09	-4.59	2.08	3.67	1.27	Small GTPase-like component of the intraflagellar transport (IFT) complex B that promotes the exit of the BBSome complex from cilia via its interaction with ARL6 (PubMed:25443296). Not involved in entry of the BBSome complex into cilium. Prevents aggregation of GTP-free ARL6 (PubMed:25443296). Required for hedgehog signaling. Forms a subcomplex within the IFT complex B with IFT25 (By similarity).…	RAYL;BBS19;RABL4	intraflagellar transport 27
Q9UKL3	CASP8AP2	3	-2.88	-6.83	-2.44	0.23	1.21	-0.05	NA	NA	NA
O43674	NDUFB5	3	-2.85	-4.97	-1.85	-1.6	-1.78	-1.2	Accessory subunit of the mitochondrial membrane respiratory chain NADH dehydrogenase (Complex I), that is believed not to be involved in catalysis. Complex I functions in the transfer of electrons from NADH to the respiratory chain. The immediate electron acceptor for the enzyme is believed to be ubiquinone. {ECO:0000269|PubMed:27626371}.	SGDH;CI-SGDH;MGC12314	NADH:ubiquinone oxidoreductase subunit B5
Q8IYI6	EXOC8	6	-2.78	-0.21	-3.71	-0.02	0.22	-0.5	Component of the exocyst complex involved in the docking of exocytic vesicles with fusion sites on the plasma membrane.	SEC84;EXO84;Exo84p	exocyst complex component 8
O75884	RBBP9	4	-2.74	-0.1	-3.16	-5.62	-1.35	-6.37	May play a role in the transformation process due to its capacity to confer resistance to the growth-inhibitory effects of TGF-beta1 through interaction with retinoblastoma and the subsequent displacement of E2F-1.	Bog	RB binding protein 9, serine hydrolase
Q96B01	RAD51AP1	3	-2.68	-1.54	-18.37	-0.77	-0.28	-2.05	May participate in a common DNA damage response pathway associated with the activation of homologous recombination and double-strand break repair. Functionally cooperates with PALB2 in promoting of D-loop formation by RAD51. Binds to single and double stranded DNA, and is capable of aggregating DNA. Also binds RNA. {ECO:0000269|PubMed:20871616, ECO:0000269|PubMed:9396801}.	PIR51	RAD51 associated protein 1
Q16134	ETFDH	5	-2.66	-1.92	-3.84	-1.82	-1.06	-6.6	Accepts electrons from ETF and reduces ubiquinone.	ETFQO	electron transfer flavoprotein dehydrogenase
Q7L0Y3	TRMT10C	19	-2.66	-3.69	-2.05	-0.91	-0.76	-1.62	Mitochondrial tRNA N(1)-methyltransferase involved in mitochondrial tRNA maturation (PubMed:18984158, PubMed:21593607, PubMed:23042678, PubMed:27132592). Component of mitochondrial ribonuclease P, a complex composed of TRMT10C/MRPP1, HSD17B10/MRPP2 and MRPP3, which cleaves tRNA molecules in their 5'-ends (PubMed:18984158). Together with HSD17B10/MRPP2, forms a subcomplex of the mitochondrial ribo…	FLJ20432;MRPP1;RG9MTD1	tRNA methyltransferase 10C, mitochondrial RNase P subunit
Q9NQZ5	STARD7	4	-2.62	-2.75	-2.59	0.51	0.16	0.51	May play a protective role in mucosal tissues by preventing exaggerated allergic responses. {ECO:0000250|UniProtKB:Q8R1R3}.	GTT1	StAR related lipid transfer domain containing 7
P56134	ATP5MF	4	-2.6	-4.13	-0.83	-0.89	0.99	-3.77	Mitochondrial membrane ATP synthase (F(1)F(0) ATP synthase or Complex V) produces ATP from ADP in the presence of a proton gradient across the membrane which is generated by electron transport complexes of the respiratory chain. F-type ATPases consist of two structural domains, F(1) - containing the extramembraneous catalytic core and F(0) - containing the membrane proton channel, linked together…	ATP5JL;ATP5J2	ATP synthase membrane subunit f
Q9NRL3	STRN4	3	-2.59	-19.28	-0.46	2.61	1.84	3.62	Binds calmodulin in a calcium dependent manner. May function as scaffolding or signaling protein.	ZIN;PPP2R6C	striatin 4
P30405	PPIF	7	-2.55	-2.11	-3.15	-0.08	-0.37	0.21	PPIases accelerate the folding of proteins. It catalyzes the cis-trans isomerization of proline imidic peptide bonds in oligopeptides. Involved in regulation of the mitochondrial permeability transition pore (mPTP). It is proposed that its association with the mPTP is masking a binding site for inhibiting inorganic phosphate (Pi) and promotes the open probability of the mPTP leading to apoptosis …	hCyP3;Cyp-D	peptidylprolyl isomerase F
P41229	KDM5C	6	-2.52	-1.96	-3.51	-1.56	-1.97	-0.9	Histone demethylase that specifically demethylates 'Lys- 4' of histone H3, thereby playing a central role in histone code (PubMed:28262558). Does not demethylate histone H3 'Lys-9', H3 'Lys-27', H3 'Lys-36', H3 'Lys-79' or H4 'Lys-20'. Demethylates trimethylated and dimethylated but not monomethylated H3 'Lys-4'. Participates in transcriptional repression of neuronal genes by recruiting histone d…	DXS1272E;XE169;SMCX;JARID1C;MRX13	lysine demethylase 5C
Q13042	CDC16	3	-2.52	16.42	-4.97	-1.23	-0.71	-1.84	Component of the anaphase promoting complex/cyclosome (APC/C), a cell cycle-regulated E3 ubiquitin ligase that controls progression through mitosis and the G1 phase of the cell cycle. The APC/C complex acts by mediating ubiquitination and subsequent degradation of target proteins: it mainly mediates the formation of 'Lys-11'-linked polyubiquitin chains and, to a lower extent, the formation of 'Ly…	APC6;ANAPC6;CUT9	cell division cycle 16
Q9ULV0	MYO5B	3	-2.5	2.79	-5.1	0.49	0.21	-0.93	May be involved in vesicular trafficking via its association with the CART complex. The CART complex is necessary for efficient transferrin receptor recycling but not for EGFR degradation. Required in a complex with RAB11A and RAB11FIP2 for the transport of NPC1L1 to the plasma membrane. Together with RAB11A participates in CFTR trafficking to the plasma membrane and TF (transferrin) recycling in…	KIAA1119	myosin VB
Q9NRS6	SNX15	3	-2.49	-2.74	-1.96	0.86	17.78	-1.58	May be involved in several stages of intracellular trafficking. Overexpression of SNX15 disrupts the normal trafficking of proteins from the plasma membrane to recycling endosomes or the TGN. {ECO:0000269|PubMed:11085978}.	NA	sorting nexin 15
Q9ULM3	YEATS2	3	-2.48	-2.39	-2.51	2.99	2.98	2.98	Chromatin reader component of the ATAC complex, a complex with histone acetyltransferase activity on histones H3 and H4. YEATS2 specifically recognizes and binds histone H3 crotonylated at 'Lys-27' (H3K27cr) (PubMed:27103431). Crotonylation marks active promoters and enhancers and confers resistance to transcriptional repressors (PubMed:27103431). {ECO:0000269|PubMed:18838386, ECO:0000269|PubMed:…	FLJ10201;FLJ12841;FLJ13308;KIAA1197	YEATS domain containing 2
P78346	RPP30	14	-2.45	-1	-3.27	-0.34	1.82	0.03	Component of ribonuclease P, a protein complex that generates mature tRNA molecules by cleaving their 5'-ends.	TSG15	ribonuclease P/MRP subunit p30
Q07864	POLE	10	-2.45	-2.79	-2.15	-0.01	-0.58	0.91	Participates in DNA repair and in chromosomal DNA replication.	POLE1	DNA polymerase epsilon, catalytic subunit
Q96R06	SPAG5	17	-2.45	-1.72	-3.16	0.26	-0.75	1.92	Essential component of the mitotic spindle required for normal chromosome segregation and progression into anaphase (PubMed:11724960, PubMed:12356910, PubMed:27462074). Required for chromosome alignment, normal timing of sister chromatid segregation, and maintenance of spindle pole architecture (PubMed:17664331, PubMed:27462074). In complex with SKAP, promotes stable microtubule-kinetochore attac…	DEEPEST;MAP126;hMAP126	sperm associated antigen 5
Q5TAQ9	DCAF8	4	-2.43	-2.09	-3.41	-0.04	-0.46	-1.08	May function as a substrate receptor for CUL4-DDB1 E3 ubiquitin-protein ligase complex. {ECO:0000269|PubMed:16949367, ECO:0000269|PubMed:16964240}.	H326;FLJ35857;WDR42A	DDB1 and CUL4 associated factor 8
Q9NRY2	INIP	5	-2.42	-2.77	-2.18	-0.55	-0.18	-2.15	Component of the SOSS complex, a multiprotein complex that functions downstream of the MRN complex to promote DNA repair and G2/M checkpoint. The SOSS complex associates with single- stranded DNA at DNA lesions and influences diverse endpoints in the cellular DNA damage response including cell-cycle checkpoint activation, recombinational repair and maintenance of genomic stability. Required for e…	HSPC043;hSSBIP1;SOSS-C;MISE;C9orf80	INTS3 and NABP interacting protein
O00411	POLRMT	12	-2.41	-2.19	-2.61	-0.66	-0.59	-0.99	DNA-dependent RNA polymerase catalyzes the transcription of mitochondrial DNA into RNA using the four ribonucleoside triphosphates as substrates. {ECO:0000269|PubMed:21278163}.	h-mtRPOL;APOLMT;MTRNAP;MTRPOL	RNA polymerase mitochondrial
Q9NV96	TMEM30A	6	-2.4	-3.39	-1.79	0.52	0.06	1.32	Accessory component of a P4-ATPase flippase complex which catalyzes the hydrolysis of ATP coupled to the transport of aminophospholipids from the outer to the inner leaflet of various membranes and ensures the maintenance of asymmetric distribution of phospholipids. Phospholipid translocation seems also to be implicated in vesicle formation and in uptake of lipid signaling molecules. The beta sub…	FLJ10856;CDC50A;C6orf67	transmembrane protein 30A
Q9Y2S7	POLDIP2	9	-2.4	-2.9	-2.19	-0.4	-0.45	-0.28	NA	PDIP38;DKFZP586F1524	DNA polymerase delta interacting protein 2
P82673	MRPS35	6	-2.39	-1.79	-3.03	-0.42	-0.27	-0.75	NA	NA	NA
Q9H1K1	ISCU	9	-2.39	-2.27	-2.53	-2.23	-2.4	-2.02	Scaffold protein for the de novo synthesis of iron- sulfur (Fe-S) clusters within mitochondria, which is required for maturation of both mitochondrial and cytoplasmic [2Fe-2S] and [4Fe-4S] proteins (PubMed:11060020). First, a [2Fe-2S] cluster is transiently assembled on the scaffold protein ISCU. In a second step, the cluster is released from ISCU, transferred to a glutaredoxin GLRX5, followed by…	ISU2;hnifU;IscU;NIFUN	iron-sulfur cluster assembly enzyme
Q9H8M2	BRD9	4	-2.39	-4.67	-1.89	0.27	1.32	-1.19	NA	NA	NA
Q86X76	NIT1	4	-2.38	0.9	-3.04	-6.81	-17.77	-5.33	Catalyzes the hydrolysis of the amide bond in N-(4- oxoglutarate)-L-cysteinylglycine (deaminated glutathione), a metabolite repair reaction to dispose of the harmful deaminated glutathione. Plays a role in cell growth and apoptosis: loss of expression promotes cell growth, resistance to DNA damage stress and increased incidence to NMBA-induced tumors. Has tumor suppressor properties that enhances…	NA	nitrilase 1
Q9NVG8	TBC1D13	4	-2.37	-1.85	-3.16	0.05	-0.28	0.38	Acts as a GTPase-activating protein for RAB35. Together with RAB35 may be involved in regulation of insulin-induced glucose transporter SLC2A4/GLUT4 translocation to the plasma membrane in adipocytes. {ECO:0000250|UniProtKB:Q8R3D1}.	FLJ10743	TBC1 domain family member 13
Q9UNP9	PPIE	4	-2.37	-1.56	-18.35	-0.53	-0.4	-2.26	NA	NA	NA
Q9BXS6	NUSAP1	6	-2.36	-0.83	-2.95	0.37	0.07	0.42	NA	NA	NA
Q00059	TFAM	8	-2.35	-1.87	-2.88	0.12	-0.06	0.24	Binds to the mitochondrial light strand promoter and functions in mitochondrial transcription regulation. Required for accurate and efficient promoter recognition by the mitochondrial RNA polymerase. Promotes transcription initiation from the HSP1 and the light strand promoter by binding immediately upstream of transcriptional start sites. Is able to unwind DNA. Bends the mitochondrial light stra…	TCF6;TCF6L2	transcription factor A, mitochondrial
Q99798	ACO2	36	-2.35	-2.15	-2.52	-0.79	-0.58	-1.08	Catalyzes the isomerization of citrate to isocitrate via cis-aconitate. {ECO:0000250|UniProtKB:P16276}.	ACONM	aconitase 2
Q9UPM8	AP4E1	3	-2.35	-3.06	-0.13	-0.5	-0.64	-4.33	Component of the adaptor protein complex 4 (AP-4). Adaptor protein complexes are vesicle coat components involved both in vesicle formation and cargo selection. They control the vesicular transport of proteins in different trafficking pathways (PubMed:10066790, PubMed:10436028). AP-4 forms a non clathrin- associated coat on vesicles departing the trans-Golgi network (TGN) and may be involved in t…	AP-4-EPSILON;SPG51	adaptor related protein complex 4 subunit epsilon 1
Q8WYQ5	DGCR8	9	-2.33	-1.31	-4.35	-0.85	-0.66	-1.49	NA	NA	NA
Q8IZP0	ABI1	7	-2.31	-0.72	-3.26	-2.45	-2.23	-2.31	NA	NA	NA
Q9HCC0	MCCC2	11	-2.31	-2.92	-1.45	0.56	1.4	-1.19	Carboxyltransferase subunit of the 3-methylcrotonyl-CoA carboxylase, an enzyme that catalyzes the conversion of 3- methylcrotonyl-CoA to 3-methylglutaconyl-CoA, a critical step for leucine and isovaleric acid catabolism. {ECO:0000269|PubMed:17360195}.	MCCB	methylcrotonoyl-CoA carboxylase 2
O95218	ZRANB2	10	-2.27	-1.78	-2.94	-0.04	0.6	-1.18	Splice factor required for alternative splicing of TRA2B/SFRS10 transcripts. May interfere with constitutive 5'- splice site selection. {ECO:0000269|PubMed:11448987}.	ZIS;ZIS1;ZIS2;ZNF265	zinc finger RANBP2-type containing 2
Q86TI0	TBC1D1	3	-2.27	-2.09	-0.68	-3.77	-4.64	13.62	May act as a GTPase-activating protein for Rab family protein(s). May play a role in the cell cycle and differentiation of various tissues. Involved in the trafficking and translocation of GLUT4-containing vesicles and insulin-stimulated glucose uptake into cells (By similarity). {ECO:0000250}.	TBC;TBC1;KIAA1108	TBC1 domain family member 1
Q96QU8	XPO6	9	-2.27	-1.5	-3.02	-0.46	-0.19	-0.08	NA	NA	NA
Q15398	DLGAP5	9	-2.25	-1.57	-3.51	-1.6	-2.18	-0.7	Potential cell cycle regulator that may play a role in carcinogenesis of cancer cells. Mitotic phosphoprotein regulated by the ubiquitin-proteasome pathway. Key regulator of adherens junction integrity and differentiation that may be involved in CDH1-mediated adhesion and signaling in epithelial cells. {ECO:0000269|PubMed:12527899, ECO:0000269|PubMed:14699157, ECO:0000269|PubMed:15145941}.	KIAA0008;DLG1;HURP;DLG7	DLG associated protein 5
Q8NDV7	TNRC6A	3	-2.25	-0.65	-17.61	2.4	3.93	-3.16	NA	NA	NA
O75306	NDUFS2	11	-2.23	-2.56	-2.12	-0.27	0.22	-1.85	Core subunit of the mitochondrial membrane respiratory chain NADH dehydrogenase (Complex I) that is believed to belong to the minimal assembly required for catalysis. Complex I functions in the transfer of electrons from NADH to the respiratory chain. The immediate electron acceptor for the enzyme is believed to be ubiquinone (PubMed:12611891). {ECO:0000269|PubMed:12611891}.	CI-49	NADH:ubiquinone oxidoreductase core subunit S2
P39880	NA	3	-2.23	-1.75	-3.82	0.35	17.65	-1.26	NA	NA	NA
Q8TF42	UBASH3B	5	-2.23	1.2	-5.59	0.28	0.07	-0.32	Interferes with CBL-mediated down-regulation and degradation of receptor-type tyrosine kinases. Promotes accumulation of activated target receptors, such as T-cell receptors and EGFR, on the cell surface. Exhibits tyrosine phosphatase activity toward several substrates including EGFR, FAK, SYK, and ZAP70. Down-regulates proteins that are dually modified by both protein tyrosine phosphorylation an…	KIAA1959;STS-1;TULA2;TULA-2	ubiquitin associated and SH3 domain containing B
Q96CM3	RPUSD4	5	-2.23	-1.48	-3.34	-0.81	-0.6	-2.49	Converts specific uridines to pseudouridine (PSI) in different mitochondrial RNA substrates. Acts on position 1397 in 16S mitochondrial ribosomal RNA (16S mt-rRNA). This modification is required for the assembly of 16S mt-rRNA into a functional mitochondrial ribosome (PubMed:27974379). Acts on position 39 in mitochondrial tRNA(Phe) (PubMed:28082677). {ECO:0000269|PubMed:27974379, ECO:0000269|PubM…	FLJ14494	RNA pseudouridine synthase D4
P82650	MRPS22	14	-2.22	-1.88	-2.54	-0.16	-0.08	-0.26	NA	MRP-S22;GK002;C3orf5;GIBT	mitochondrial ribosomal protein S22
Q14188	TFDP2	3	-2.22	-2.59	9.71	5.73	15.92	2.04	NA	NA	NA
Q8N983	MRPL43	5	-2.2	-5.15	-1.18	-0.65	-0.44	-0.92	NA	NA	NA
O95363	FARS2	4	-2.19	-2.46	-2.01	-0.64	-0.39	-1.51	Is responsible for the charging of tRNA(Phe) with phenylalanine in mitochondrial translation. To a lesser extent, also catalyzes direct attachment of m-Tyr (an oxidized version of Phe) to tRNA(Phe), thereby opening the way for delivery of the misacylated tRNA to the ribosome and incorporation of ROS-damaged amino acid into proteins. {ECO:0000269|PubMed:19549855, ECO:0000269|PubMed:22833457}.	dJ236A3.1;FARS1	phenylalanyl-tRNA synthetase 2, mitochondrial
P82675	MRPS5	9	-2.19	-1	-5.44	-0.58	-0.89	-0.2	NA	MRP-S5;S5mt	mitochondrial ribosomal protein S5
Q12933	TRAF2	3	-2.19	-0.76	-3.04	-1.88	-2.45	-0.91	Regulates activation of NF-kappa-B and JNK and plays a central role in the regulation of cell survival and apoptosis. Required for normal antibody isotype switching from IgM to IgG. Has E3 ubiquitin-protein ligase activity and promotes 'Lys-63'- linked ubiquitination of target proteins, such as BIRC3, RIPK1 and TICAM1. Is an essential constituent of several E3 ubiquitin- protein ligase complexes,…	TRAP3;RNF117	TNF receptor associated factor 2
Q92499	DDX1	40	-2.19	-1.71	-2.59	1.09	0.15	2.1	Acts as an ATP-dependent RNA helicase, able to unwind both RNA-RNA and RNA-DNA duplexes. Possesses 5' single-stranded RNA overhang nuclease activity. Possesses ATPase activity on various RNA, but not DNA polynucleotides. May play a role in RNA clearance at DNA double-strand breaks (DSBs), thereby facilitating the template-guided repair of transcriptionally active regions of the genome. Together w…	DBP-RB	DEAD-box helicase 1
Q9Y2R5	MRPS17	3	-2.17	-0.5	-18.27	-2.69	-1.63	-8.07	NA	HSPC011;RPMS17;MRP-S17	mitochondrial ribosomal protein S17
Q8NF91	SYNE1	7	-2.15	-1.39	-3.29	-2.26	-1.38	-2.99	NA	NA	NA
Q9NRY4	ARHGAP35	8	-2.15	-3.68	0.99	1.9	-1.28	5.29	NA	NA	NA
P32780	GTF2H1	5	-2.14	-18.14	-0.26	7.24	19.93	4.13	Component of the general transcription and DNA repair factor IIH (TFIIH) core complex, which is involved in general and transcription-coupled nucleotide excision repair (NER) of damaged DNA and, when complexed to CAK, in RNA transcription by RNA polymerase II. In NER, TFIIH acts by opening DNA around the lesion to allow the excision of the damaged oligonucleotide and its replacement by a new DNA …	BTF2;P62;TFIIH	general transcription factor IIH subunit 1
Q9Y2R9	MRPS7	11	-2.14	-1.93	-2.33	-0.4	-0.28	-0.67	NA	MRP-S;RP-S7;RPMS7	mitochondrial ribosomal protein S7
P37268	FDFT1	8	-2.13	-1.92	-2.34	0.18	-0.43	1.3	NA	NA	farnesyl-diphosphate farnesyltransferase 1
Q9BT17	MTG1	3	-2.12	-5.75	-1.55	-0.96	-0.91	-0.84	Plays a role in the regulation of the mitochondrial ribosome assembly and of translational activity. Displays mitochondrial GTPase activity. {ECO:0000269|PubMed:23396448}.	GTPBP7	mitochondrial ribosome associated GTPase 1
Q9NRX2	MRPL17	11	-2.11	-1.76	-2.5	-0.36	-0.17	-0.76	NA	RPML26;MRP-L26	mitochondrial ribosomal protein L17
Q9BRJ2	MRPL45	8	-2.1	-1.81	-2.37	-0.39	-0.31	-0.65	NA	NA	NA
O95785	WIZ	9	-2.09	-2.11	-2.09	-0.37	-0.28	-0.81	NA	NA	NA
Q6UXV4	APOOL	4	-2.09	-0.08	-3.94	2.08	2.1	1.97	Component of the MICOS complex, a large protein complex of the mitochondrial inner membrane that plays crucial roles in the maintenance of crista junctions, inner membrane architecture, and formation of contact sites to the outer membrane. Specifically binds to cardiolipin (in vitro) but not to the precursor lipid phosphatidylglycerol. Plays a crucial role in crista junction formation and mitocho…	UNQ8193;AAIR8193;Mic27;MICOS27;CXorf33;FAM121A	apolipoprotein O like
Q9H8V3	ECT2	7	-2.09	-1.31	-4.34	0.71	0.62	-0.32	Guanine nucleotide exchange factor (GEF) that catalyzes the exchange of GDP for GTP. Promotes guanine nucleotide exchange on the Rho family members of small GTPases, like RHOA, RHOC, RAC1 and CDC42. Required for signal transduction pathways involved in the regulation of cytokinesis. Component of the centralspindlin complex that serves as a microtubule-dependent and Rho-mediated signaling required…	ARHGEF31	epithelial cell transforming 2
Q8N5N7	MRPL50	7	-2.08	-1.08	-3.06	-0.12	0.4	-0.76	NA	FLJ20493;MRP-L50	mitochondrial ribosomal protein L50
P22830	FECH	4	-2.05	-2.07	-2.01	-0.29	-1.27	1.12	Catalyzes the ferrous insertion into protoporphyrin IX.	NA	ferrochelatase
Q9BPX3	NCAPG	26	-2.05	-2.4	-1.81	-0.31	2.09	-2.55	Regulatory subunit of the condensin complex, a complex required for conversion of interphase chromatin into mitotic-like condense chromosomes. The condensin complex probably introduces positive supercoils into relaxed DNA in the presence of type I topoisomerases and converts nicked DNA into positive knotted forms in the presence of type II topoisomerases. {ECO:0000269|PubMed:11136719}.	FLJ12450;hCAP-G;CAP-G;YCG1	non-SMC condensin I complex subunit G
Q9HC16	APOBEC3G	8	-2.04	-2.73	-1.19	-0.34	-0.56	-0.69	DNA deaminase (cytidine deaminase) which acts as an inhibitor of retrovirus replication and retrotransposon mobility via deaminase-dependent and -independent mechanisms. Exhibits potent antiviral activity against vif-deficient HIV-1. After the penetration of retroviral nucleocapsids into target cells of infection and the initiation of reverse transcription, it can induce the conversion of cytosin…	CEM15;MDS019;dJ494G10.1;FLJ12740;bK150C2.7	apolipoprotein B mRNA editing enzyme catalytic subunit 3G
P14649	MYL6B	3	-2.03	-1.6	-3.85	1.52	1.76	0.71	Regulatory light chain of myosin. Does not bind calcium.	MLC1SA	myosin light chain 6B
Q8N1G0	ZNF687	6	-2.02	1.04	-2.66	-1.24	-1.82	-0.41	May be involved in transcriptional regulation.	KIAA1441	zinc finger protein 687
Q8N7X0	ADGB	4	-2.02	-3.7	0.05	0.47	1.06	-13.88	NA	FLJ23121;dJ408K24.1;CAPN16;C6orf103	androglobin
Q9UKK3	PARP4	4	-2	-2.21	-1.84	-1.78	-1.88	-1.62	NA	VAULT3;p193;VPARP;VWA5C;ADPRTL1	poly(ADP-ribose) polymerase family member 4
Q4G176	ACSF3	11	-1.99	-1.92	-1.95	-1.28	-1.35	-0.97	Catalyzes the initial reaction in intramitochondrial fatty acid synthesis, by activating malonate and methylmalonate, but not acetate, into their respective CoA thioester. May have some preference toward very-long-chain substrates. {ECO:0000269|PubMed:17762044, ECO:0000269|PubMed:21841779}.	NA	acyl-CoA synthetase family member 3
O60566	BUB1B	16	-1.98	-2.24	-1.84	0.44	0.43	0.28	NA	NA	NA
Q8IU85	CAMK1D	9	-1.97	-5.11	-1.12	0.53	0.65	0.02	Calcium/calmodulin-dependent protein kinase that operates in the calcium-triggered CaMKK-CaMK1 signaling cascade and, upon calcium influx, activates CREB-dependent gene transcription, regulates calcium-mediated granulocyte function and respiratory burst and promotes basal dendritic growth of hippocampal neurons. In neutrophil cells, required for cytokine- induced proliferative responses and activ…	CKLiK	calcium/calmodulin dependent protein kinase ID
Q99523	SORT1	4	-1.97	-1.72	-2.21	1.74	1.77	1.62	Functions as a sorting receptor in the Golgi compartment and as a clearance receptor on the cell surface. Required for protein transport from the Golgi apparatus to the lysosomes by a pathway that is independent of the mannose-6-phosphate receptor (M6PR). Also required for protein transport from the Golgi apparatus to the endosomes. Promotes neuronal apoptosis by mediating endocytosis of the proa…	Gp95;NT3	sortilin 1
Q9Y399	MRPS2	6	-1.97	-1.83	-2.1	0.23	0.6	-0.9	NA	CGI-91	mitochondrial ribosomal protein S2
O75496	GMNN	5	-1.96	-3.15	-1.4	-0.57	-0.64	-0.58	Inhibits DNA replication by preventing the incorporation of MCM complex into pre-replication complex (pre-RC). It is degraded during the mitotic phase of the cell cycle. Its destruction at the metaphase-anaphase transition permits replication in the succeeding cell cycle.	Gem	geminin, DNA replication inhibitor
P11234	RALB	3	-1.96	-1.53	-2.4	-7.96	-9.7	-6.46	Multifunctional GTPase involved in a variety of cellular processes including gene expression, cell migration, cell proliferation, oncogenic transformation and membrane trafficking. Accomplishes its multiple functions by interacting with distinct downstream effectors. Acts as a GTP sensor for GTP-dependent exocytosis of dense core vesicles (By similarity). Required both to stabilize the assembly o…	NA	RAS like proto-oncogene B
Q12834	CDC20	13	-1.96	-2.12	-1.83	-1.14	-0.72	-1.42	Required for full ubiquitin ligase activity of the anaphase promoting complex/cyclosome (APC/C) and may confer substrate specificity upon the complex. Is regulated by MAD2L1: in metaphase the MAD2L1-CDC20-APC/C ternary complex is inactive and in anaphase the CDC20-APC/C binary complex is active in degrading substrates. The CDC20-APC/C complex positively regulates the formation of synaptic vesicle…	p55CDC;CDC20A	cell division cycle 20
Q86U28	ISCA2	4	-1.96	-2.96	-0.93	-2.24	-2.63	-1.64	Involved in the maturation of mitochondrial 4Fe-4S proteins functioning late in the iron-sulfur cluster assembly pathway. May be involved in the binding of an intermediate of Fe/S cluster assembly. {ECO:0000269|PubMed:22323289}.	ISA2;HBLD1	iron-sulfur cluster assembly 2
Q9HC38	GLOD4	17	-1.96	-0.6	-2.9	-0.22	-0.29	-0.12	NA	CGI-150;HC71;C17orf25	glyoxalase domain containing 4
Q9Y5N6	ORC6	6	-1.96	-2.18	-1.06	-1.44	-1.73	-0.86	Component of the origin recognition complex (ORC) that binds origins of replication. DNA-binding is ATP-dependent. The specific DNA sequences that define origins of replication have not been identified yet. ORC is required to assemble the pre- replication complex necessary to initiate DNA replication. Does not bind histone H3 and H4 trimethylation marks H3K9me3, H3K27me3 and H4K20me3. {ECO:000026…	ORC6L	origin recognition complex subunit 6
O95155	UBE4B	6	-1.95	-1.56	-2.34	-0.04	-0.14	0.17	NA	NA	NA
O95926	SYF2	4	-1.95	-1.69	-2.22	1.32	0.28	2.31	May be involved in pre-mRNA splicing. {ECO:0000250}.	p29;DKFZp564O2082;NTC31;fSAP29;CBPIN	SYF2 pre-mRNA splicing factor
P46199	MTIF2	4	-1.95	-1.51	-4.83	-1.59	-0.33	-3.54	One of the essential components for the initiation of protein synthesis. Protects formylmethionyl-tRNA from spontaneous hydrolysis and promotes its binding to the 30S ribosomal subunits. Also involved in the hydrolysis of GTP during the formation of the 70S ribosomal complex.	IF-2mt	mitochondrial translational initiation factor 2
Q02224	CENPE	14	-1.95	-1.88	-2.02	0.59	0.41	0.51	Microtubule plus-end-directed kinetochore motor which plays an important role in chromosome congression, microtubule- kinetochore conjugation and spindle assembly checkpoint activation. Drives chromosome congression (alignment of chromosomes at the spindle equator resulting in the formation of the metaphase plate) by mediating the lateral sliding of polar chromosomes along spindle microtubules to…	KIF10;PPP1R61	centromere protein E
Q99583	MNT	3	-1.95	-1.87	-1.89	2.04	2.12	1.78	Binds DNA as a heterodimer with MAX and represses transcription. Binds to the canonical E box sequence 5'-CACGTG-3' and, with higher affinity, to 5'-CACGCG-3'.	ROX;MXD6;MAD6;bHLHd3	MAX network transcriptional repressor
Q9Y3D3	MRPS16	8	-1.95	-2.53	-1.48	-0.83	-0.4	-1.72	NA	CGI-132	mitochondrial ribosomal protein S16
Q8WWC4	MAIP1	5	-1.94	-1.8	-2.04	-0.43	-0.85	0.19	Promotes sorting of SMDT1/EMRE in mitochondria by ensuring its maturation (PubMed:27642048). Interacts with the transit peptide region of SMDT1/EMRE precursor protein in the mitochondrial matrix, leading to protect it against protein degradation by YME1L1, thereby ensuring SMDT1/EMRE maturation by the mitochondrial processing peptidase (PMPCA and PMPCB) (PubMed:27642048). {ECO:0000269|PubMed:2764…	DKFZp666A212;FLJ22555;C2orf47	matrix AAA peptidase interacting protein 1
Q92665	MRPS31	5	-1.94	-1.97	-1.83	-0.44	-0.48	-0.38	NA	IMOGN38	mitochondrial ribosomal protein S31
P22681	CBL	8	-1.92	-3.37	-0.41	-1.55	-1.49	-2.7	Adapter protein that functions as a negative regulator of many signaling pathways that are triggered by activation of cell surface receptors. Acts as an E3 ubiquitin-protein ligase, which accepts ubiquitin from specific E2 ubiquitin-conjugating enzymes, and then transfers it to substrates promoting their degradation by the proteasome. Recognizes activated receptor tyrosine kinases, including KIT,…	RNF55;c-Cbl;CBL2	Cbl proto-oncogene
O15270	SPTLC2	7	-1.91	-1.32	-2.66	-1.16	0.37	-2.06	Serine palmitoyltransferase (SPT). The heterodimer formed with LCB1/SPTLC1 constitutes the catalytic core. The composition of the serine palmitoyltransferase (SPT) complex determines the substrate preference. The SPTLC1-SPTLC2-SPTSSA complex shows a strong preference for C16-CoA substrate, while the SPTLC1-SPTLC2-SPTSSB complex displays a preference for C18-CoA substrate. {ECO:0000269|PubMed:1941…	KIAA0526;LCB2;LCB2A;hLCB2a	serine palmitoyltransferase long chain base subunit 2
Q9BXW7	HDHD5	12	-1.91	-1.86	-1.88	-0.45	-1.17	0.67	NA	CECR5	haloacid dehalogenase like hydrolase domain containing 5
O14965	AURKA	7	-1.9	-1.94	-1.73	-0.35	-0.25	-0.65	Mitotic serine/threonine kinase that contributes to the regulation of cell cycle progression. Associates with the centrosome and the spindle microtubules during mitosis and plays a critical role in various mitotic events including the establishment of mitotic spindle, centrosome duplication, centrosome separation as well as maturation, chromosomal alignment, spindle assembly checkpoint, and cytok…	BTAK;AurA;STK7;ARK1;PPP1R47;AIK;STK15;STK6	aurora kinase A
P07203	GPX1	8	-1.9	-0.74	-3.59	0.9	0.41	1.94	Protects the hemoglobin in erythrocytes from oxidative breakdown.	NA	glutathione peroxidase 1
P32322	PYCR1	18	-1.9	-1.92	-1.79	-0.47	-0.3	-0.85	Housekeeping enzyme that catalyzes the last step in proline biosynthesis. Can utilize both NAD and NADP, but has higher affinity for NAD. Involved in the cellular response to oxidative stress. {ECO:0000269|PubMed:16730026, ECO:0000269|PubMed:19648921}.	P5C	pyrroline-5-carboxylate reductase 1
Q4LE39	ARID4B	4	-1.89	-7.74	-1.15	-0.83	-17.13	16.93	NA	NA	NA
Q9ULJ3	ZBTB21	8	-1.89	-1.18	-3.86	1.62	1.09	2.97	Acts as a transcription repressor. {ECO:0000269|PubMed:15629158}.	KIAA1227;ZNF295	zinc finger and BTB domain containing 21
P48449	LSS	9	-1.88	-1.46	-2.34	-2.04	-1.63	-2.09	Catalyzes the cyclization of (S)-2,3 oxidosqualene to lanosterol, a reaction that forms the sterol nucleus. Through the production of lanosterol may regulate lens protein aggregation and increase transparency. {ECO:0000269|PubMed:26200341, ECO:0000269|PubMed:7639730}.	OSC	lanosterol synthase
Q15306	IRF4	10	-1.88	-1.16	-3.02	-0.18	0	-0.21	Transcriptional activator. Binds to the interferon- stimulated response element (ISRE) of the MHC class I promoter. Binds the immunoglobulin lambda light chain enhancer, together with PU.1. Probably plays a role in ISRE-targeted signal transduction mechanisms specific to lymphoid cells. Involved in CD8(+) dendritic cell differentiation by forming a complex with the BATF-JUNB heterodimer in immune…	LSIRF;MUM1	interferon regulatory factor 4
Q9HC36	MRM3	6	-1.88	-2.01	-1.82	-0.11	-0.39	0.3	S-adenosyl-L-methionine-dependent 2'-O-ribose methyltransferase that catalyzes the formation of 2'-O- methylguanosine at position 1370 (Gm1370) in the 16S mitochondrial large subunit ribosomal RNA (mtLSU rRNA), a conserved modification in the peptidyl transferase domain of the mtLSU rRNA. {ECO:0000269|PubMed:24036117, ECO:0000269|PubMed:25009282, ECO:0000269|PubMed:25074936}.	FLJ10581;HC90;RMTL1;RNMTL1	mitochondrial rRNA methyltransferase 3
Q6P6C2	ALKBH5	6	-1.87	-1.82	-1.86	-2.13	-1.66	-3.85	Dioxygenase that demethylates RNA by oxidative demethylation: specifically demethylates N(6)-methyladenosine (m6A) RNA, the most prevalent internal modification of messenger RNA (mRNA) in higher eukaryotes (PubMed:23177736, PubMed:24778178, PubMed:24616105, PubMed:24489119). Can also demethylate N(6)- methyladenosine in single-stranded DNA (in vitro) (PubMed:24616105). Requires molecular oxygen, …	FLJ20308;OFOXD1	alkB homolog 5, RNA demethylase
Q9Y605	MRFAP1	5	-1.87	-1.78	-1.95	0.23	0.37	0.04	NA	PAM14;PGR1	Morf4 family associated protein 1
O75446	SAP30	4	-1.86	-3.23	-0.9	-1.87	-1.37	-1.88	Involved in the functional recruitment of the Sin3- histone deacetylase complex (HDAC) to a specific subset of N-CoR corepressor complexes. Capable of transcription repression by N- CoR. Active in deacetylating core histone octamers (when in a complex) but inactive in deacetylating nucleosomal histones. {ECO:0000250|UniProtKB:O88574, ECO:0000269|PubMed:9651585}.	NA	Sin3A associated protein 30
Q9Y639	NPTN	3	-1.86	1.29	-3.83	-0.93	2.23	-2.83	Probable homophilic and heterophilic cell adhesion molecule involved in long term potentiation at hippocampal excitatory synapses through activation of p38MAPK. May also regulate neurite outgrowth by activating the FGFR1 signaling pathway. May play a role in synaptic plasticity (By similarity). {ECO:0000250}.	SDR1;GP55;GP65;np65;np55;SDFR1	neuroplastin
Q03111	MLLT1	5	-1.85	-1.27	-2.73	-0.07	-0.54	1.31	Component of the super elongation complex (SEC), a complex required to increase the catalytic rate of RNA polymerase II transcription by suppressing transient pausing by the polymerase at multiple sites along the DNA. {ECO:0000269|PubMed:20159561, ECO:0000269|PubMed:20471948}.	ENL;LTG19;YEATS1	MLLT1, super elongation complex subunit
Q6NXT1	ANKRD54	7	-1.85	-0.76	-9.07	-0.29	-0.27	-0.4	Plays an important role in regulating intracellular signaling events associated with erythroid terminal differentiation. {ECO:0000250}.	LIAR	ankyrin repeat domain 54
Q8N5F7	NKAP	4	-1.85	-3.34	0.69	1.04	0.94	0.77	Acts as a transcriptional repressor. Plays a role as a transcriptional corepressor of the Notch-mediated signaling required for T-cell development. Also involved in the TNF and IL-1 induced NF-kappa-B activation. Associates with chromatin at the Notch-regulated SKP2 promoter. {ECO:0000269|PubMed:14550261, ECO:0000269|PubMed:19409814}.	FLJ22626	NFKB activating protein
Q9NXR5	ANKRD10	3	-1.85	-0.57	-2.61	-1.48	-4.06	0.02	NA	FLJ20093	ankyrin repeat domain 10
Q86SX6	GLRX5	9	-1.84	-1.44	-2.23	-0.88	-0.91	-0.69	Monothiol glutaredoxin involved in the biogenesis of iron-sulfur clusters (PubMed:20364084). Involved in protein lipoylation, acting in the pathway that provides an iron-sulfur cluster to lipoate synthase (PubMed:24334290). Required for normal iron homeostasis. Required for normal regulation of hemoglobin synthesis by the iron-sulfur protein ACO1 (PubMed:20364084). May protect cells against apopt…	PR01238;GRX5;C14orf87	glutaredoxin 5
Q96EY7	PTCD3	12	-1.84	-2.33	-1.58	-0.6	-0.44	-1.04	Mitochondrial RNA-binding protein that has a role in mitochondrial translation. {ECO:0000269|PubMed:19427859}.	FLJ20758;DKFZp666K071	pentatricopeptide repeat domain 3
Q8WUX9	CHMP7	5	-1.83	-3.63	-1.11	-0.1	-0.23	-0.03	ESCRT-III-like protein required to recruit the ESCRT-III complex to the nuclear envelope during late anaphase (PubMed:26040712). Together with SPAST, the ESCRT-III complex promotes nuclear envelope sealing and mitotic spindle disassembly during late anaphase (PubMed:26040712). Plays a role in the endosomal sorting pathway (PubMed:16856878). {ECO:0000269|PubMed:16856878, ECO:0000269|PubMed:2604071…	MGC29816	charged multivesicular body protein 7
O15523	DDX3Y	11	-1.82	-2	-1.6	0.46	0.29	0.78	Probable ATP-dependent RNA helicase. May play a role in spermatogenesis.	DBY	DEAD-box helicase 3 Y-linked
P62072	TIMM10	5	-1.81	-1.89	-1.4	0.03	0.98	-0.44	Mitochondrial intermembrane chaperone that participates in the import and insertion of multi-pass transmembrane proteins into the mitochondrial inner membrane. May also be required for the transfer of beta-barrel precursors from the TOM complex to the sorting and assembly machinery (SAM complex) of the outer membrane. Acts as a chaperone-like protein that protects the hydrophobic precursors from …	TIM10;TIM10A;TIMM10A	translocase of inner mitochondrial membrane 10
P30042	NA	8	-1.8	-3.56	-1.43	-3.07	-3.06	-2.82	NA	NA	NA
P82932	MRPS6	5	-1.8	-2.61	-0.98	-0.57	0.05	-1.52	NA	MRP-S6;RPMS6;C21orf101	mitochondrial ribosomal protein S6
Q16850	CYP51A1	3	-1.8	-2.39	-1.45	-0.73	-0.2	-3.14	NA	NA	NA
Q5U5X0	LYRM7	3	-1.79	-3.37	-1.08	-1.42	-1.9	-0.65	Assembly factor required for Rieske Fe-S protein UQCRFS1 incorporation into the cytochrome b-c1 (CIII) complex. Functions as a chaperone, binding to this subunit within the mitochondrial matrix and stabilizing it prior to its translocation and insertion into the late CIII dimeric intermediate within the mitochondrial inner membrane. {ECO:0000269|PubMed:23168492}.	FLJ20796;MZM1L;C5orf31	LYR motif containing 7
Q8TCS8	PNPT1	36	-1.79	-1.81	-1.77	-1.02	-0.82	-1.28	RNA-binding protein implicated in numerous RNA metabolic processes. Catalyzes the phosphorolysis of single-stranded polyribonucleotides processively in the 3'-to-5' direction. Mitochondrial intermembrane factor with RNA-processing exoribonulease activity. Component of the mitochondrial degradosome (mtEXO) complex, that degrades 3' overhang double- stranded RNA with a 3'-to-5' directionality in an…	PNPase;OLD35;old-35;DFNB70	polyribonucleotide nucleotidyltransferase 1
P16220	CREB1	4	-1.78	0.86	-4.14	0.03	-0.68	1.3	Phosphorylation-dependent transcription factor that stimulates transcription upon binding to the DNA cAMP response element (CRE), a sequence present in many viral and cellular promoters. Transcription activation is enhanced by the TORC coactivators which act independently of Ser-133 phosphorylation. Involved in different cellular processes including the synchronization of circadian rhythmicity an…	NA	cAMP responsive element binding protein 1
Q00535	CDK5	7	-1.78	-2.22	-1.57	0.01	-0.51	1.21	Proline-directed serine/threonine-protein kinase essential for neuronal cell cycle arrest and differentiation and may be involved in apoptotic cell death in neuronal diseases by triggering abortive cell cycle re-entry. Interacts with D1 and D3- type G1 cyclins. Phosphorylates SRC, NOS3, VIM/vimentin, p35/CDK5R1, MEF2A, SIPA1L1, SH3GLB1, PXN, PAK1, MCAM/MUC18, SEPT5, SYN1, DNM1, AMPH, SYNJ1, CDK16…	PSSALRE	cyclin dependent kinase 5
Q9H008	LHPP	3	-1.78	16.93	-3.29	1.96	1.53	1.08	Phosphatase that hydrolyzes imidodiphosphate, 3- phosphohistidine and 6-phospholysine. Has broad substrate specificity and can also hydrolyze inorganic diphosphate, but with lower efficiency (By similarity). {ECO:0000250}.	HDHD2B	phospholysine phosphohistidine inorganic pyrophosphate phosphatase
Q14197	MRPL58	4	-1.77	-1.45	-2.08	-0.95	-0.62	-1.59	Essential peptidyl-tRNA hydrolase component of the mitochondrial large ribosomal subunit. Acts as a codon-independent translation release factor that has lost all stop codon specificity and directs the termination of translation in mitochondrion, possibly in case of abortive elongation. May be involved in the hydrolysis of peptidyl-tRNAs that have been prematurely terminated and thus in the recyc…	DS-1;ICT1	mitochondrial ribosomal protein L58
Q86YB8	ERO1B	3	-1.77	-1.31	-2.29	-0.39	-0.59	-0.2	Oxidoreductase involved in disulfide bond formation in the endoplasmic reticulum. Efficiently reoxidizes P4HB/PDI, the enzyme catalyzing protein disulfide formation, in order to allow P4HB to sustain additional rounds of disulfide formation. Other protein disulfide isomerase family members can also be reoxidized, but at lower rates compared to P4HB, including PDIA2 (50% of P4HB reoxidation rate),…	ERO1-L(beta);Ero1beta;ERO1LB	endoplasmic reticulum oxidoreductase 1 beta
Q9BPX6	MICU1	6	-1.77	-2	-1.7	-0.76	-0.72	-0.95	NA	NA	NA
O15504	NUP42	5	-1.76	-0.39	-4.43	0.47	0.23	0.79	Required for the export of mRNAs containing poly(A) tails from the nucleus into the cytoplasm. In case of infection by HIV-1, it may participate in the docking of viral Vpr at the nuclear envelope. {ECO:0000269|PubMed:10610322, ECO:0000269|PubMed:16000379}.	NLP 1;CG1;hCG1;H RG271G13.9	nucleoporin like 2
P20674	COX5A	17	-1.76	-0.47	-2.71	-0.51	-0.23	-0.59	This is the heme A-containing chain of cytochrome c oxidase, the terminal oxidase in mitochondrial electron transport.	NA	cytochrome c oxidase subunit 5A
Q6NXE6	ARMC6	8	-1.75	-1.05	-2.2	-0.28	-0.02	-0.64	NA	MGC19595	armadillo repeat containing 6
Q9NR56	MBNL1	6	-1.75	-0.3	-2.29	1.17	0.66	2.75	Mediates pre-mRNA alternative splicing regulation. Acts either as activator or repressor of splicing on specific pre-mRNA targets. Inhibits cardiac troponin-T (TNNT2) pre-mRNA exon inclusion but induces insulin receptor (IR) pre-mRNA exon inclusion in muscle. Antagonizes the alternative splicing activity pattern of CELF proteins. Regulates the TNNT2 exon 5 skipping through competition with U2AF2.…	KIAA0428;EXP42;EXP40;EXP35;EXP;MBNL	muscleblind like splicing regulator 1
O75330	HMMR	9	-1.74	-2.35	-1.34	-0.39	-0.33	-0.5	Receptor for hyaluronic acid (HA) (By similarity). Involved in cell motility (By similarity). When hyaluronan binds to HMMR, the phosphorylation of a number of proteins, including PTK2/FAK1 occurs. May also be involved in cellular transformation and metastasis formation, and in regulating extracellular- regulated kinase (ERK) activity. May act as a regulator of adipogenisis (By similarity). {ECO:…	RHAMM;CD168	hyaluronan mediated motility receptor
P82930	MRPS34	4	-1.73	-3.89	-1.68	-1.13	-0.62	-2.41	Required for mitochondrial translation, plays a role in maintaining the stability of the small ribosomal subunit and the 12S rRNA that are required for mitoribosome formation. {ECO:0000250|UniProtKB:Q9JIK9}.	MRP-S12;MGC2616	mitochondrial ribosomal protein S34
Q9BYD1	MRPL13	4	-1.73	-2.28	-1.45	-1.11	-0.93	-1.66	NA	L13;RPL13;L13mt;RPML13;L13A	mitochondrial ribosomal protein L13
O94925	GLS	24	-1.72	-2.02	-1.42	-0.72	-1.01	-0.28	Catalyzes the first reaction in the primary pathway for the renal catabolism of glutamine. Plays a role in maintaining acid-base homeostasis. Regulates the levels of the neurotransmitter glutamate in the brain. Isoform 2 lacks catalytic activity.	KIAA0838;GLS1	glutaminase
Q8N6N7	ACBD7	3	-1.72	-19.23	17.5	-1.21	-18.83	1.98	Binds medium- and long-chain acyl-CoA esters.	FLJ38219;bA455B2.2	acyl-CoA binding domain containing 7
Q96RP9	GFM1	20	-1.72	-1.72	-1.7	-0.74	-0.56	-0.89	Mitochondrial GTPase that catalyzes the GTP-dependent ribosomal translocation step during translation elongation. During this step, the ribosome changes from the pre-translocational (PRE) to the post-translocational (POST) state as the newly formed A- site-bound peptidyl-tRNA and P-site-bound deacylated tRNA move to the P and E sites, respectively. Catalyzes the coordinated movement of the two tR…	EFGM;GFM;EGF1;mtEF-G1	G elongation factor mitochondrial 1
P50897	PPT1	7	-1.71	-2.11	-1.4	-1.86	-2.02	-1.52	Removes thioester-linked fatty acyl groups such as palmitate from modified cysteine residues in proteins or peptides during lysosomal degradation. Prefers acyl chain lengths of 14 to 18 carbons (PubMed:8816748). {ECO:0000269|PubMed:8816748}.	CLN1;INCL;PPT	palmitoyl-protein thioesterase 1
Q14149	MORC3	4	-1.71	-1.56	-1.84	0.45	0.85	0	Nuclear factor which forms MORC3-NBs (nuclear bodies) via an ATP-dependent mechanism (PubMed:20501696). Sumoylated MORC3-NBs can also associate with PML-NBs (PubMed:20501696). Recruits TP53 and SP100 to PML-NBs, thus regulating TP53 activity (PubMed:17332504). Binds RNA in vitro (PubMed:11927593). May be required for influenza A transcription during viral infection (PubMed:26202233). {ECO:0000269…	ZCW5;NXP2;KIAA0136;ZCWCC3	MORC family CW-type zinc finger 3
Q8IW35	CEP97	8	-1.71	-4.09	-0.34	-0.63	-0.91	-0.23	Acts as a key negative regulator of ciliogenesis in collaboration with CCP110 by capping the mother centriole thereby preventing cilia formation. Required for recruitment of CCP110 to the centrosome. {ECO:0000269|PubMed:17719545}.	FLJ23047;LRRIQ2	centrosomal protein 97
Q96PZ0	PUS7	12	-1.7	-1.34	-2.01	-0.44	-0.05	-1.22	NA	FLJ20485	pseudouridine synthase 7
P53350	PLK1	8	-1.69	-2.09	-1.39	-0.14	0.17	-0.44	Serine/threonine-protein kinase that performs several important functions throughout M phase of the cell cycle, including the regulation of centrosome maturation and spindle assembly, the removal of cohesins from chromosome arms, the inactivation of anaphase-promoting complex/cyclosome (APC/C) inhibitors, and the regulation of mitotic exit and cytokinesis. Polo-like kinase proteins acts by bindin…	PLK	polo like kinase 1
Q8IV63	VRK3	4	-1.68	-2.46	-0.88	0.56	0.29	1.11	Inactive kinase that suppresses ERK activity by promoting phosphatase activity of DUSP3 which specifically dephosphorylates and inactivates ERK in the nucleus. {ECO:0000250, ECO:0000269|PubMed:14645249, ECO:0000269|PubMed:19141289}.	NA	VRK serine/threonine kinase 3
Q9BQ70	TCF25	5	-1.68	-0.73	-3.21	-1.88	-3.08	-0.54	May play a role in cell death control. Acts as a transcriptional repressor. Has been shown to repress transcription of SRF in vitro and so may play a role in heart development. {ECO:0000269|PubMed:16574069}.	Nulp1;KIAA1049	transcription factor 25
P52756	RBM5	9	-1.67	-1.84	-1.08	-0.09	-0.47	0.44	NA	NA	NA
Q6KC79	NIPBL	17	-1.67	-2.47	-0.21	0.61	0.32	0.99	Plays an important role in the loading of the cohesin complex on to DNA. Forms a heterodimeric complex (also known as cohesin loading complex) with MAU2/SCC4 which mediates the loading of the cohesin complex onto chromatin (PubMed:22628566, PubMed:28914604). Plays a role in cohesin loading at sites of DNA damage. Its recruitement to double-strand breaks (DSBs) sites occurs in a CBX3-, RNF8- and R…	IDN3;DKFZp434L1319;FLJ11203;FLJ12597;FLJ13354;FLJ13648;Scc2	NIPBL, cohesin loading factor
Q86WA8	LONP2	4	-1.67	-0.35	-19.54	2.49	2.13	-11.05	ATP-dependent serine protease that mediates the selective degradation of misfolded and unassembled polypeptides in the peroxisomal matrix. Necessary for type 2 peroxisome targeting signal (PTS2)-containing protein processing and facilitates peroxisome matrix protein import (By similarity). May indirectly regulate peroxisomal fatty acid beta-oxidation through degradation of the self-processed form…	MGC4840;LONP;LONPL	lon peptidase 2, peroxisomal
Q9HA77	CARS2	4	-1.67	-1.56	-1.74	-0.94	-1.03	-0.9	NA	FLJ12118	cysteinyl-tRNA synthetase 2, mitochondrial
Q06265	EXOSC9	7	-1.66	-2.94	-1.3	0.44	0.98	0	Non-catalytic component of the RNA exosome complex which has 3'->5' exoribonuclease activity and participates in a multitude of cellular RNA processing and degradation events. In the nucleus, the RNA exosome complex is involved in proper maturation of stable RNA species such as rRNA, snRNA and snoRNA, in the elimination of RNA processing by-products and non-coding 'pervasive' transcripts, such as…	PM/Scl-75;Rrp45p;RRP45;p5;p6;PMSCL1	exosome component 9
Q9HC35	EML4	13	-1.66	-2.8	-0.27	-0.14	-0.01	-0.89	NA	NA	NA
O75179	ANKRD17	8	-1.65	-3.11	0.36	-0.63	-0.66	-0.44	NA	NA	NA
Q13459	MYO9B	3	-1.65	-1.58	-1.72	0.43	-0.03	1.38	Myosins are actin-based motor molecules with ATPase activity. Unconventional myosins serve in intracellular movements. Binds actin with high affinity both in the absence and presence of ATP and its mechanochemical activity is inhibited by calcium ions (PubMed:9490638). Also acts as a GTPase activator for RHOA (PubMed:9490638, PubMed:26529257). Plays a role in the regulation of cell migration via …	CELIAC4	myosin IXB
Q9ULR0	ISY1	13	-1.65	-0.62	-2.97	0.73	0.43	1.21	May play a role in pre-mRNA splicing. {ECO:0000305}.	KIAA1160;fSAP33	ISY1 splicing factor homolog
O43837	IDH3B	15	-1.64	-2.22	-0.79	-0.73	-0.74	-0.75	NA	NA	NA
P49411	TUFM	42	-1.64	-1.96	-1.38	-0.23	-0.16	-0.33	Promotes the GTP-dependent binding of aminoacyl-tRNA to the A-site of ribosomes during protein biosynthesis. Plays also a role in the regulation of autophagy and innate immunity. Recruits ATG5-ATG12 and NLRX1 at mitochondria and serves as a checkpoint of the RIG-I/DDX58-MAVS pathway. In turn, inhibits RLR-mediated type I interferon while promoting autophagy. {ECO:0000269|PubMed:22749352, ECO:0000…	EFTu;EF-TuMT;EFTU	Tu translation elongation factor, mitochondrial
P62070	RRAS2	4	-1.64	-1.39	-1.88	-1.13	-0.47	-3.11	It is a plasma membrane-associated GTP-binding protein with GTPase activity. Might transduce growth inhibitory signals across the cell membrane, exerting its effect through an effector shared with the Ras proteins but in an antagonistic fashion.	TC21	RAS related 2
Q9BT23	LIMD2	5	-1.64	-0.24	-8.11	0.32	4.89	-0.11	Acts as an activator of the protein-kinase ILK, thereby regulating cell motility (PubMed:24590809). {ECO:0000269|PubMed:24590809}.	MGC10986	LIM domain containing 2
Q9H7E2	TDRD3	3	-1.64	-3.35	15.22	3.2	16.65	-1.02	Scaffolding protein that specifically recognizes and binds dimethylarginine-containing proteins. In nucleus, acts as a coactivator: recognizes and binds asymmetric dimethylation on the core histone tails associated with transcriptional activation (H3R17me2a and H4R3me2a) and recruits proteins at these arginine- methylated loci. In cytoplasm, may play a role in the assembly and/or disassembly of m…	FLJ21007	tudor domain containing 3
Q14643	ITPR1	3	-1.63	0.11	-15.24	-0.11	3.11	-1.3	Intracellular channel that mediates calcium release from the endoplasmic reticulum following stimulation by inositol 1,4,5- trisphosphate (PubMed:27108797). Involved in the regulation of epithelial secretion of electrolytes and fluid through the interaction with AHCYL1 (By similarity). Plays a role in ER stress-induced apoptosis. Cytoplasmic calcium released from the ER triggers apoptosis by the …	Insp3r1;IP3R1;ACV;PPP1R94;SCA15;SCA16;SCA29	inositol 1,4,5-trisphosphate receptor type 1
Q9P0P8	MTRES1	4	-1.63	-1.36	-1.88	-1.06	-0.81	-1.35	NA	HSPC230;PRED31	chromosome 6 open reading frame 203
P42858	HTT	16	-1.62	-2.27	0	-0.19	-0.27	-0.23	May play a role in microtubule-mediated transport or vesicle function.	IT15;HD	huntingtin
Q9UBI1	COMMD3	6	-1.62	-1.31	-1.94	0	-0.32	0.29	May modulate activity of cullin-RING E3 ubiquitin ligase (CRL) complexes (PubMed:21778237). May down-regulate activation of NF-kappa-B (PubMed:15799966). Modulates Na(+) transport in epithelial cells by regulation of apical cell surface expression of amiloride-sensitive sodium channel (ENaC) subunits (PubMed:23637203). {ECO:0000269|PubMed:15799966, ECO:0000269|PubMed:23637203, ECO:0000305|PubMed:…	BUP;C10orf8	COMM domain containing 3
Q9ULG1	INO80	3	-1.62	14.46	-16.09	-0.31	-1.47	6.5	DNA helicase and probable main scaffold component of the chromatin remodeling INO80 complex which is involved in transcriptional regulation, DNA replication and probably DNA repair; according to PubMed:20687897 the contribution to DNA double-strand break repair appears to be largely indirect through transcriptional regulation. Recruited by YY1 to YY1-activated genes, where it acts as an essential…	KIAA1259;Ino80;hINO80;INO80A;INOC1	INO80 complex subunit
Q9Y3B8	REXO2	4	-1.62	-20.07	-0.29	-0.58	-2.96	3.23	3'-to-5' exoribonuclease specific for small oligoribonucleotides. Active on small (primarily </=5 nucleotides in length) single-stranded RNA and DNA oligomers. May have a role in cellular nucleotide recycling. {ECO:0000269|PubMed:23741365}.	DKFZP566E144;SFN;CGI-114	RNA exonuclease 2
P62314	SNRPD1	5	-1.61	-1.45	-1.73	-0.48	-0.31	-1.02	Core component of the spliceosomal U1, U2, U4 and U5 small nuclear ribonucleoproteins (snRNPs), the building blocks of the spliceosome. Thereby, plays an important role in the splicing of cellular pre-mRNAs. Most spliceosomal snRNPs contain a common set of Sm proteins SNRPB, SNRPD1, SNRPD2, SNRPD3, SNRPE, SNRPF and SNRPG that assemble in a heptameric protein ring on the Sm site of the small nucle…	HsT2456;Sm-D1;SNRPD	small nuclear ribonucleoprotein D1 polypeptide
Q9BSU1	C16orf70	4	-1.6	-5.44	-1.31	2.53	1.88	16.99	NA	lin-10;FLJ12076;C16orf6;LIN10	chromosome 16 open reading frame 70
Q9Y4P3	TBL2	8	-1.6	-2.43	-0.47	0.61	-0.8	2.85	NA	WS-betaTRP;WBSCR13;DKFZP43N024	transducin beta like 2
P48047	ATP5PO	15	-1.59	-1.72	-1.32	-0.79	-0.79	-0.69	Mitochondrial membrane ATP synthase (F(1)F(0) ATP synthase or Complex V) produces ATP from ADP in the presence of a proton gradient across the membrane which is generated by electron transport complexes of the respiratory chain. F-type ATPases consist of two structural domains, F(1) - containing the extramembraneous catalytic core and F(0) - containing the membrane proton channel, linked together…	OSCP;ATPO;ATP5O	ATP synthase peripheral stalk subunit OSCP
Q8IWV8	UBR2	7	-1.59	-2.98	-0.05	2.28	1.9	2.78	E3 ubiquitin-protein ligase which is a component of the N-end rule pathway. Recognizes and binds to proteins bearing specific N-terminal residues that are destabilizing according to the N-end rule, leading to their ubiquitination and subsequent degradation. Plays a critical role in chromatin inactivation and chromosome-wide transcriptional silencing during meiosis via ubiquitination of histone H2…	bA49A4.1;dJ392M17.3;KIAA0349;C6orf133	ubiquitin protein ligase E3 component n-recognin 2
Q9BZG8	DPH1	4	-1.59	-1.97	-1.36	-0.04	0.05	-0.19	Required for the first step in the synthesis of diphthamide, a post-translational modification of histidine which occurs in translation elongation factor 2 (EEF2). When overexpressed, suppresses colony formation ability and growth rate of ovarian cancer cells. Acts also as a tumor suppressor in lung and breast cancers (By similarity). Plays a role in embryonic growth, organogenesis and postnatal …	OVCA1;DPH2L;DPH2L1	diphthamide biosynthesis 1
O14578	CIT	9	-1.58	-1.6	-1.42	-0.15	0.1	-1.03	Plays a role in cytokinesis. Required for KIF14 localization to the central spindle and midbody. Putative RHO/RAC effector that binds to the GTP-bound forms of RHO and RAC1. It probably binds p21 with a tighter specificity in vivo. Displays serine/threonine protein kinase activity. Plays an important role in the regulation of cytokinesis and the development of the central nervous system. Phosphor…	KIAA0949;STK21;CRIK;CITK	citron rho-interacting serine/threonine kinase
Q14562	DHX8	9	-1.58	-0.1	-1.95	2.39	3.69	-0.12	Facilitates nuclear export of spliced mRNA by releasing the RNA from the spliceosome. {ECO:0000269|PubMed:8608946}.	HRH1;PRP22;PRPF22;Dhr2;DDX8	DEAH-box helicase 8
O75381	PEX14	6	-1.57	-1.07	-2.27	1.38	0.47	2.27	Peroxisome membrane protein that is an essential component of the peroxisomal import machinery. Functions as a docking factor for the predominantly cytoplasmic PTS1 receptor (PEX5). Plays a key role for peroxisome movement through a direct interaction with tubulin. {ECO:0000269|PubMed:21525035, ECO:0000269|PubMed:9653144}.	NA	peroxisomal biogenesis factor 14
P46778	RPL21	10	-1.57	-1.26	-1.81	1.49	-0.4	2.76	NA	NA	NA
Q13601	KRR1	8	-1.56	-1.25	-1.88	0.26	0.14	0.08	Required for 40S ribosome biogenesis. Involved in nucleolar processing of pre-18S ribosomal RNA and ribosome assembly (By similarity). {ECO:0000250}.	RIP-1;HRB2	KRR1, small subunit processome component homolog
Q9BV19	C1orf50	3	-1.56	3.73	-3.98	-3.26	-2.84	-4.21	NA	MGC955	chromosome 1 open reading frame 50
Q9H444	CHMP4B	5	-1.56	-1.74	-1.24	-0.44	-0.2	-0.79	Probable core component of the endosomal sorting required for transport complex III (ESCRT-III) which is involved in multivesicular bodies (MVBs) formation and sorting of endosomal cargo proteins into MVBs. MVBs contain intraluminal vesicles (ILVs) that are generated by invagination and scission from the limiting membrane of the endosome and mostly are delivered to lysosomes enabling degradation …	dJ553F4.4;Shax1;SNF7-2;VPS32B;C20orf178	charged multivesicular body protein 4B
Q9NYY8	FASTKD2	7	-1.56	-1.46	-1.64	-0.3	-0.48	-0.03	Plays an important role in assembly of the mitochondrial large ribosomal subunit (PubMed:25683715). {ECO:0000269|PubMed:25683715}.	KIAA0971	FAST kinase domains 2
O95169	NDUFB8	4	-1.55	-1.15	-1.92	0.18	-0.35	1	Accessory subunit of the mitochondrial membrane respiratory chain NADH dehydrogenase (Complex I), that is believed not to be involved in catalysis. Complex I functions in the transfer of electrons from NADH to the respiratory chain. The immediate electron acceptor for the enzyme is believed to be ubiquinone. {ECO:0000269|PubMed:27626371}.	ASHI;CI-ASHI	NADH:ubiquinone oxidoreductase subunit B8
P25325	MPST	10	-1.55	-0.97	-2.2	0	0.51	-1.11	Transfer of a sulfur ion to cyanide or to other thiol compounds. Also has weak rhodanese activity. Detoxifies cyanide and is required for thiosulfate biosynthesis. Acts as an antioxidant. In combination with cysteine aminotransferase (CAT), contributes to the catabolism of cysteine and is an important producer of hydrogen sulfide in the brain, retina and vascular endothelial cells. Hydrogen sulfi…	MST;TST2;TUM1	mercaptopyruvate sulfurtransferase
Q15642	TRIP10	4	-1.55	-0.88	-2.64	-2.69	0.36	-2.68	NA	NA	NA
Q16718	NDUFA5	8	-1.55	-1.35	-1.71	-0.47	-1.08	0.41	Accessory subunit of the mitochondrial membrane respiratory chain NADH dehydrogenase (Complex I), that is believed not to be involved in catalysis. Complex I functions in the transfer of electrons from NADH to the respiratory chain. The immediate electron acceptor for the enzyme is believed to be ubiquinone. {ECO:0000269|PubMed:27626371}.	B13;NUFM;CI-13KD-B;UQOR13;CI-13kB	NADH:ubiquinone oxidoreductase subunit A5
Q969S9	GFM2	7	-1.55	-0.44	-4.34	-1.88	-2.33	-1.2	Mitochondrial GTPase that mediates the disassembly of ribosomes from messenger RNA at the termination of mitochondrial protein biosynthesis. Acts in collaboration with MRRF. GTP hydrolysis follows the ribosome disassembly and probably occurs on the ribosome large subunit. Not involved in the GTP-dependent ribosomal translocation step during translation elongation. {ECO:0000255|HAMAP-Rule:MF 03059…	EFG2;FLJ21661;EF-G2mt	G elongation factor mitochondrial 2
Q08AG7	MZT1	3	-1.54	3.42	-4.24	0.46	-0.5	1.63	Required for gamma-tubulin complex recruitment to the centrosome. {ECO:0000269|PubMed:20360068}.	LOC440145;FLJ21869;MGC150539;RP11-11C5.2;MOZART1;C13orf37	mitotic spindle organizing protein 1
Q96RL1	UIMC1	5	-1.54	-1.09	-1.85	-0.82	-1.65	0.52	NA	NA	NA
O43615	TIMM44	24	-1.53	-1.97	-1.29	-0.27	-0.54	0.11	Essential component of the PAM complex, a complex required for the translocation of transit peptide-containing proteins from the inner membrane into the mitochondrial matrix in an ATP-dependent manner. Recruits mitochondrial HSP70 to drive protein translocation into the matrix using ATP as an energy source. {ECO:0000250|UniProtKB:Q01852}.	TIM44	translocase of inner mitochondrial membrane 44
O94967	WDR47	3	-1.53	-2.05	1.25	-0.97	-1.29	-0.51	NA	KIAA0893	WD repeat domain 47
P33121	ACSL1	5	-1.53	0.48	-4.66	-0.72	-0.26	-1.56	Activation of long-chain fatty acids for both synthesis of cellular lipids, and degradation via beta-oxidation. Preferentially uses palmitoleate, oleate and linoleate.	LACS2;LACS;ACS1;LACS1;FACL1;FACL2	acyl-CoA synthetase long chain family member 1
Q9Y6M9	NDUFB9	4	-1.53	-1.38	-1.64	-1.05	-0.49	-1.59	Accessory subunit of the mitochondrial membrane respiratory chain NADH dehydrogenase (Complex I), that is believed to be not involved in catalysis. Complex I functions in the transfer of electrons from NADH to the respiratory chain. The immediate electron acceptor for the enzyme is believed to be ubiquinone. {ECO:0000269|PubMed:27626371}.	B22;UQOR22;LYRM3	NADH:ubiquinone oxidoreductase subunit B9
O75600	GCAT	6	-1.52	-2.81	-0.35	-0.39	-0.62	0.04	NA	KBL	glycine C-acetyltransferase
Q13952	NFYC	3	-1.52	-1.95	-0.5	-0.81	0.44	-0.77	NA	NA	NA
Q14686	NCOA6	3	-1.52	0.07	-15.59	1.33	0.41	2.27	Nuclear receptor coactivator that directly binds nuclear receptors and stimulates the transcriptional activities in a hormone-dependent fashion. Coactivates expression in an agonist- and AF2-dependent manner. Involved in the coactivation of different nuclear receptors, such as for steroids (GR and ERs), retinoids (RARs and RXRs), thyroid hormone (TRs), vitamin D3 (VDR) and prostanoids (PPARs). Pr…	KIAA0181;RAP250;ASC2;AIB3;PRIP;TRBP;NRC	nuclear receptor coactivator 6
Q8IUX7	AEBP1	9	-1.51	-1.63	-1.34	1	1.09	0.43	May positively regulate MAP-kinase activity in adipocytes, leading to enhanced adipocyte proliferation and reduced adipocyte differentiation. May also positively regulate NF-kappa-B activity in macrophages by promoting the phosphorylation and subsequent degradation of I-kappa-B-alpha (NFKBIA), leading to enhanced macrophage inflammatory responsiveness. Can act as a transcriptional repressor. {ECO…	ACLP	AE binding protein 1
Q9NQW6	ANLN	8	-1.51	-1.71	-1.31	0.05	0	0.1	Required for cytokinesis (PubMed:16040610). Essential for the structural integrity of the cleavage furrow and for completion of cleavage furrow ingression. Plays a role in bleb assembly during metaphase and anaphase of mitosis (PubMed:23870127). May play a significant role in podocyte cell migration (PubMed:24676636). {ECO:0000269|PubMed:10931866, ECO:0000269|PubMed:12479805, ECO:0000269|PubMed:1…	ANILLIN;Scraps;scra	anillin actin binding protein
Q4ADV7	RIC1	3	-1.5	-1.34	-0.93	-0.09	0.29	-0.31	NA	NA	NA
P51149	RAB7A	12	-1.49	-1.78	-1.27	-0.79	-1.34	0.1	Key regulator in endo-lysosomal trafficking. Governs early-to-late endosomal maturation, microtubule minus-end as well as plus-end directed endosomal migration and positioning, and endosome-lysosome transport through different protein-protein interaction cascades. Plays a central role, not only in endosomal traffic, but also in many other cellular and physiological events, such as growth-factor-m…	RAB7	RAB7A, member RAS oncogene family
O75155	CAND2	3	-1.48	0.22	-1.71	-0.85	-0.14	-3.65	Probable assembly factor of SCF (SKP1-CUL1-F-box protein) E3 ubiquitin ligase complexes that promotes the exchange of the substrate-recognition F-box subunit in SCF complexes, thereby playing a key role in the cellular repertoire of SCF complexes. {ECO:0000250}.	TIP120B;KIAA0667;Tp120b	cullin associated and neddylation dissociated 2 (putative)
Q13309	SKP2	8	-1.48	-1.62	-1.35	-0.06	0.01	-0.2	Substrate recognition component of a SCF (SKP1-CUL1-F- box protein) E3 ubiquitin-protein ligase complex which mediates the ubiquitination and subsequent proteasomal degradation of target proteins involved in cell cycle progression, signal transduction and transcription. Specifically recognizes phosphorylated CDKN1B/p27kip and is involved in regulation of G1/S transition. Degradation of CDKN1B/p27…	FBXL1;FBL1;p45	S-phase kinase associated protein 2
Q562E7	WDR81	6	-1.48	-1.34	-1.52	-2.27	-2.5	-1.73	NA	NA	NA
Q6MZP7	LIN54	4	-1.48	-0.99	-2.1	-0.64	1.12	-3.33	Component of the DREAM complex, a multiprotein complex that can both act as a transcription activator or repressor depending on the context (PubMed:17671431, PubMed:17531812). In G0 phase, the complex binds to more than 800 promoters and is required for repression of E2F target genes (PubMed:17671431, PubMed:17531812). In S phase, the complex selectively binds to the promoters of G2/M genes whose…	MIP120;DKFZp686L1814;JC8.6;CXCDC1;TCX1	lin-54 DREAM MuvB core complex component
Q9H936	SLC25A22	5	-1.47	-1.93	2.71	-1.38	-19.58	0.98	NA	NA	NA
Q9UBD5	ORC3	5	-1.47	0.43	-2.4	-0.57	-1.63	1.14	NA	NA	NA
O14593	RFXANK	4	-1.46	-3.87	1.34	-0.16	-0.12	-0.62	Activates transcription from class II MHC promoters. Activation requires the activity of the MHC class II transactivator/CIITA. May regulate other genes in the cell. RFX binds the X1 box of MHC-II promoters (PubMed:9806546, PubMed:10072068, PubMed:10725724). May also potentiate the activation of RAF1 (By similarity). {ECO:0000250|UniProtKB:Q9Z205, ECO:0000269|PubMed:10072068, ECO:0000269|PubMed:1…	BLS;RFX-B;ANKRA1;F14150 1;MGC138628	regulatory factor X associated ankyrin containing protein
Q8IX90	SKA3	6	-1.46	-1.95	-0.87	0.15	0.27	-0.25	Component of the SKA1 complex, a microtubule-binding subcomplex of the outer kinetochore that is essential for proper chromosome segregation (PubMed:19289083, PubMed:19360002, PubMed:23085020). The SKA1 complex is a direct component of the kinetochore-microtubule interface and directly associates with microtubules as oligomeric assemblies (PubMed:19289083, PubMed:19360002). The complex facilitate…	MGC4832;RAMA1;C13orf3	spindle and kinetochore associated complex subunit 3
Q8N5M4	TTC9C	6	-1.46	-1.58	-1.25	0.17	-0.02	0.24	NA	MGC29649	tetratricopeptide repeat domain 9C
Q9BRK5	SDF4	3	-1.46	-19.63	18.16	-0.27	0.41	-0.53	NA	NA	NA
O75439	PMPCB	17	-1.45	-1.37	-1.52	-0.3	-0.25	-0.51	Cleaves presequences (transit peptides) from mitochondrial protein precursors. {ECO:0000250}.	MPPB;MPPP52	peptidase, mitochondrial processing beta subunit
Q8IYU8	MICU2	3	-1.45	-1.59	-1.15	-0.12	0.25	-0.88	Key regulator of mitochondrial calcium uniporter (MCU) required to limit calcium uptake by MCU when cytoplasmic calcium is low (PubMed:24503055, PubMed:24560927, PubMed:26903221). MICU1 and MICU2 form a disulfide-linked heterodimer that stimulate and inhibit MCU activity, depending on the concentration of calcium (PubMed:24560927). MICU2 acts as a gatekeeper of MCU that senses calcium level via i…	EFHA1	mitochondrial calcium uptake 2
Q9BV86	NTMT1	3	-1.45	-0.21	-16.79	1.94	1.04	4.91	Distributive alpha-N-methyltransferase that methylates the N-terminus of target proteins containing the N-terminal motif [Ala/Gly/Pro/Ser]-Pro-Lys when the initiator Met is cleaved. Specifically catalyzes mono-, di- or tri-methylation of the exposed alpha-amino group of the Ala, Gly or Ser residue in the [Ala/Gly/Ser]-Pro-Lys motif and mono- or di-methylation of Pro in the Pro-Pro-Lys motif. Some…	AD-003;HOMT1A;NRMT1;NRMT;C9orf32;METTL11A	N-terminal Xaa-Pro-Lys N-methyltransferase 1
Q9HBE1	PATZ1	3	-1.45	-2.18	-0.72	-0.57	-3.9	2.64	Transcriptional repressor. {ECO:0000269|PubMed:10713105}.	MAZR;dJ400N23;ZBTB19;ZSG;RIAZ;PATZ;ZNF278	POZ/BTB and AT hook containing zinc finger 1
Q9NRX1	PNO1	6	-1.45	-0.92	-2.04	-2.47	-2.18	-3.2	Positively regulates dimethylation of two adjacent adenosines in the loop of a conserved hairpin near the 3'-end of 18S rRNA (PubMed:25851604). {ECO:0000269|PubMed:25851604}.	RRP20;KHRBP1	partner of NOB1 homolog
P35240	NF2	5	-1.44	-3.58	0.63	-0.03	0.3	-0.1	NA	NA	NA
P46109	CRKL	14	-1.44	-0.88	-1.9	0.15	0.13	0.21	May mediate the transduction of intracellular signals.	NA	CRK like proto-oncogene, adaptor protein
Q9BVC5	C2orf49	5	-1.44	-1.74	-1.13	0.1	-0.35	0.81	NA	MGC5509;asw	chromosome 2 open reading frame 49
P04179	SOD2	13	-1.43	-1.68	-1.36	-1.78	-2.22	-1.12	NA	NA	NA
P09001	MRPL3	10	-1.43	-1.43	-1.46	-0.38	-0.1	-0.67	NA	MRL3;RPML3	mitochondrial ribosomal protein L3
P11182	DBT	7	-1.43	-0.24	-3.38	-0.14	0.25	-1.57	The branched-chain alpha-keto dehydrogenase complex catalyzes the overall conversion of alpha-keto acids to acyl-CoA and CO(2). It contains multiple copies of three enzymatic components: branched-chain alpha-keto acid decarboxylase (E1), lipoamide acyltransferase (E2) and lipoamide dehydrogenase (E3). Within this complex, the catalytic function of this enzyme is to accept, and to transfer to coen…	NA	dihydrolipoamide branched chain transacylase E2
Q02218	OGDH	19	-1.43	-0.93	-1.95	-0.41	-0.06	-1.03	2-oxoglutarate dehydrogenase (E1) component of the 2- oxoglutarate dehydrogenase complex, which mediates the decarboxylation of alpha-ketoglutarate (PubMed:24495017). The 2- oxoglutarate dehydrogenase complex catalyzes the overall conversion of 2-oxoglutarate to succinyl-CoA and CO(2) (PubMed:24495017). The 2-oxoglutarate dehydrogenase complex is mainly active in the mitochondrion (PubMed:2921171…	E1k	oxoglutarate dehydrogenase
Q96AT1	KIAA1143	9	-1.43	-1.6	-1.32	-0.36	0.19	-0.39	NA	NA	KIAA1143
Q9Y2U8	LEMD3	7	-1.43	-1.22	-1.64	1.36	1.96	-1.16	Can function as a specific repressor of TGF-beta, activin, and BMP signaling through its interaction with the R-SMAD proteins. Antagonizes TGF-beta-induced cell proliferation arrest. {ECO:0000269|PubMed:15601644, ECO:0000269|PubMed:15647271}.	MAN1	LEM domain containing 3
Q9HCG8	CWC22	11	-1.42	-1.2	-1.59	0.29	-0.13	0.95	Required for pre-mRNA splicing and for exon-junction complex (EJC) assembly. Hinders EIF4A3 from non-specifically binding RNA and escorts it to the splicing machinery to promote EJC assembly on mature mRNAs. Through its role in EJC assembly, required for nonsense-mediated mRNA decay. {ECO:0000269|PubMed:22959432, ECO:0000269|PubMed:22961380, ECO:0000269|PubMed:23236153}.	KIAA1604;EIF4GL;fSAPb;NCM	CWC22 spliceosome associated protein homolog
Q9P2R3	ANKFY1	11	-1.42	-3.05	1.52	-1.61	-1.62	-1.54	Proposed effector of Rab5. Binds to phosphatidylinositol 3-phosphate (PI(3)P). Involved in homotypic early endosome fusion and to a lesser extent in heterotypic fusion of chlathrin-coated vesicles with early endosomes. Involved in macropinocytosis; the function is dependent on Rab5-GTP. Required for correct endosomal localization. Involved in the internalization and trafficking of activated tyros…	ANKHZN;KIAA1255;ZFYVE14;BTBD23;RANK-5	ankyrin repeat and FYVE domain containing 1
O43318	MAP3K7	8	-1.41	-0.41	-2.89	0.11	0.2	0.01	NA	NA	NA
O43734	TRAF3IP2	6	-1.41	-0.35	-5.2	0.25	0.83	-0.64	NA	NA	NA
Q7LBR1	CHMP1B	3	-1.41	-1.18	-1.62	-2.81	-2.55	-3.71	Probable peripherally associated component of the endosomal sorting required for transport complex III (ESCRT-III) which is involved in multivesicular bodies (MVBs) formation and sorting of endosomal cargo proteins into MVBs. MVBs contain intraluminal vesicles (ILVs) that are generated by invagination and scission from the limiting membrane of the endosome and mostly are delivered to lysosomes en…	CHMP1.5;C18orf2;Vps46B	charged multivesicular body protein 1B
Q9Y448	KNSTRN	5	-1.41	-1.31	-1.49	-0.21	-0.27	-0.29	Essential component of the mitotic spindle required for faithful chromosome segregation and progression into anaphase (PubMed:19667759). Promotes the metaphase-to-anaphase transition and is required for chromosome alignment, normal timing of sister chromatid segregation, and maintenance of spindle pole architecture (PubMed:19667759, PubMed:22110139). The astrin (SPAG5)-kinastrin (SKAP) complex pr…	FLJ14502;SKAP;kinastrin;TRAF4AF1;C15orf23	kinetochore localized astrin (SPAG5) binding protein
Q9Y4C1	KDM3A	11	-1.41	-1.28	-1.52	-0.9	-0.61	-1.22	Histone demethylase that specifically demethylates 'Lys- 9' of histone H3, thereby playing a central role in histone code. Preferentially demethylates mono- and dimethylated H3 'Lys-9' residue, with a preference for dimethylated residue, while it has weak or no activity on trimethylated H3 'Lys-9'. Demethylation of Lys residue generates formaldehyde and succinate. Involved in hormone-dependent tr…	TSGA;KIAA0742;JHMD2A;JMJD1;JMJD1A	lysine demethylase 3A
O75348	ATP6V1G1	8	-1.4	-3.51	-0.49	-0.4	-0.32	-0.38	Catalytic subunit of the peripheral V1 complex of vacuolar ATPase (V-ATPase). V-ATPase is responsible for acidifying a variety of intracellular compartments in eukaryotic cells. In aerobic conditions, involved in intracellular iron homeostasis, thus triggering the activity of Fe(2+) prolyl hydroxylase (PHD) enzymes, and leading to HIF1A hydroxylation and subsequent proteasomal degradation (PubMed…	ATP6GL;Vma10;ATP6G;DKFZp547P234;ATP6J;ATP6G1	ATPase H+ transporting V1 subunit G1
P30622	CLIP1	15	-1.4	-0.65	-2.54	-1.35	-1.84	-0.54	Binds to the plus end of microtubules and regulates the dynamics of the microtubule cytoskeleton. Promotes microtubule growth and microtubule bundling. Links cytoplasmic vesicles to microtubules and thereby plays an important role in intracellular vesicle trafficking. Plays a role macropinocytosis and endosome trafficking. {ECO:0000269|PubMed:12433698, ECO:0000269|PubMed:17563362, ECO:0000269|Pub…	CYLN1;CLIP170;CLIP;CLIP-170;RSN	CAP-Gly domain containing linker protein 1
Q13627	DYRK1A	5	-1.4	-0.61	-2.63	-2.22	-1.32	-3.13	Dual-specificity kinase which possesses both serine/threonine and tyrosine kinase activities. May play a role in a signaling pathway regulating nuclear functions of cell proliferation. Modulates alternative splicing by phosphorylating the splice factor SRSF6 (By similarity). Exhibits a substrate preference for proline at position P+1 and arginine at position P- 3. Has pro-survival function and ne…	DYRK1;DYRK;MNBH	dual specificity tyrosine phosphorylation regulated kinase 1A
Q16763	UBE2S	8	-1.4	-1.24	-1.53	0.03	-0.12	0.28	Accepts ubiquitin from the E1 complex and catalyzes its covalent attachment to other proteins (PubMed:22496338). Catalyzes 'Lys-11'-linked polyubiquitination. Acts as an essential factor of the anaphase promoting complex/cyclosome (APC/C), a cell cycle- regulated ubiquitin ligase that controls progression through mitosis. Acts by specifically elongating 'Lys-11'-linked polyubiquitin chains initia…	E2-EPF	ubiquitin conjugating enzyme E2 S
Q6UVJ0	SASS6	11	-1.4	-0.66	-3.02	-0.72	-0.77	-0.87	Central scaffolding component of the centrioles ensuring their 9-fold symmetry. Required for centrosome biogenesis and duplication: required both for mother-centriole-dependent centriole duplication and deuterosome-dependent centriole amplification in multiciliated cells. Overexpression results in excess foci-bearing centriolar markers. Required for the recruitment of STIL to the procentriole and…	DKFZp761A078;SAS-6;FLJ22097;SAS6	SAS-6 centriolar assembly protein
Q99856	ARID3A	5	-1.4	0.09	-6.79	-0.36	0.48	-1.99	Transcription factor which may be involved in the control of cell cycle progression by the RB1/E2F1 pathway and in B-cell differentiation. {ECO:0000269|PubMed:11812999, ECO:0000269|PubMed:12692263}.	BRIGHT;DRIL1	AT-rich interaction domain 3A
P30038	ALDH4A1	18	-1.39	-2.74	0.11	-1.26	-0.77	-1.38	NA	NA	NA
P54886	ALDH18A1	59	-1.39	-1.85	-0.98	-0.15	-0.06	-0.26	NA	NA	NA
Q5W0B1	OBI1	6	-1.39	-1.75	-1.1	-0.18	-0.47	0.27	NA	FLJ13449;C13orf7	ring finger protein 219
Q71RC2	LARP4	10	-1.39	-1.77	-0.68	0.68	0.49	-0.37	RNA binding protein that binds to the poly-A tract of mRNA molecules (PubMed:21098120). Associates with the 40S ribosomal subunit and with polysomes (PubMed:21098120). Plays a role in the regulation of mRNA translation (PubMed:21098120). Plays a role in the regulation of cell morphology and cytoskeletal organization (PubMed:21834987, PubMed:27615744). {ECO:0000269|PubMed:21098120, ECO:0000269|Pub…	PP13296	La ribonucleoprotein domain family member 4
O60244	MED14	5	-1.38	-1.99	0.47	-2.61	-3.02	-2.04	Component of the Mediator complex, a coactivator involved in the regulated transcription of nearly all RNA polymerase II-dependent genes. Mediator functions as a bridge to convey information from gene-specific regulatory proteins to the basal RNA polymerase II transcription machinery. Mediator is recruited to promoters by direct interactions with regulatory proteins and serves as a scaffold for t…	EXLM1;CRSP150;TRAP170;RGR1;CSRP;CXorf4;CRSP2	mediator complex subunit 14
P20936	RASA1	4	-1.38	-0.91	-2.49	-0.13	0.23	-1.03	Inhibitory regulator of the Ras-cyclic AMP pathway. Stimulates the GTPase of normal but not oncogenic Ras p21; this stimulation may be further increased in the presence of NCK1. {ECO:0000269|PubMed:11389730, ECO:0000269|PubMed:8360177}.	GAP;CM-AVM;p120GAP;p120RASGAP;p120;RASA	RAS p21 protein activator 1
Q13015	MLLT11	4	-1.38	-0.62	-3.52	-0.61	-2.29	6.53	Cofactor for the transcription factor TCF7 (PubMed:26079538). Involved in regulation of lymphoid development by driving multipotent hematopoietic progenitor cells towards a T cell fate (PubMed:21715312). {ECO:0000269|PubMed:21715312, ECO:0000269|PubMed:26079538}.	AF1Q	MLLT11, transcription factor 7 cofactor
Q5UIP0	RIF1	21	-1.38	-1.87	0.59	-1.08	-1.86	-0.19	NA	NA	NA
Q9HBF4	ZFYVE1	3	-1.38	-1.93	-0.68	0.99	0.55	1.08	NA	DFCP1;KIAA1589;TAFF1;PPP1R172;ZNFN2A1	zinc finger FYVE-type containing 1
Q9NSE4	IARS2	28	-1.38	-1.19	-1.55	-0.81	-0.68	-1.39	NA	NA	NA
P17813	ENG	5	-1.37	-3.22	0.11	0.14	0.18	0.3	Vascular endothelium glycoprotein that plays an important role in the regulation of angiogenesis (PubMed:21737454, PubMed:23300529). Required for normal structure and integrity of adult vasculature (PubMed:7894484). Regulates the migration of vascular endothelial cells (PubMed:17540773). Required for normal extraembryonic angiogenesis and for embryonic heart development (By similarity). May play …	END;HHT1;CD105;ORW1;ORW	endoglin
Q8IWV7	UBR1	6	-1.37	-1.06	-1.86	1.67	2.34	-1.09	E3 ubiquitin-protein ligase which is a component of the N-end rule pathway. Recognizes and binds to proteins bearing specific N-terminal residues that are destabilizing according to the N-end rule, leading to their ubiquitination and subsequent degradation. May be involved in pancreatic homeostasis. Binds leucine and is a negative regulator of the leucine-mTOR signaling pathway, thereby controlli…	NA	ubiquitin protein ligase E3 component n-recognin 1
O75489	NDUFS3	12	-1.36	-2.68	-0.85	-1.03	-1.51	-0.27	Core subunit of the mitochondrial membrane respiratory chain NADH dehydrogenase (Complex I) that is believed to belong to the minimal assembly required for catalysis. Complex I functions in the transfer of electrons from NADH to the respiratory chain. The immediate electron acceptor for the enzyme is believed to be ubiquinone (By similarity). {ECO:0000250}.	CI-30	NADH:ubiquinone oxidoreductase core subunit S3
P82094	TMF1	11	-1.36	-1.83	-0.43	0.74	0.58	0.92	Potential coactivator of the androgen receptor. Mediates STAT3 degradation. May play critical roles in two RAB6-dependent retrograde transport processes: one from endosomes to the Golgi and the other from the Golgi to the ER. This protein binds the HIV-1 TATA element and inhibits transcriptional activation by the TATA-binding protein (TBP). {ECO:0000269|PubMed:10428808, ECO:0000269|PubMed:1409643…	ARA160;TMF	TATA element modulatory factor 1
Q7Z3U7	MON2	7	-1.36	-1.4	-1.32	-0.68	-1.35	0.23	NA	NA	NA
Q99536	VAT1	7	-1.36	-1.33	-0.88	-1.35	-3.17	0.8	Possesses ATPase activity (By similarity). Plays a part in calcium-regulated keratinocyte activation in epidermal repair mechanisms. Has no effect on cell proliferation. Negatively regulates mitochondrial fusion in cooperation with mitofusin proteins (MFN1-2). {ECO:0000250, ECO:0000269|PubMed:12898150, ECO:0000269|PubMed:17105775, ECO:0000269|PubMed:19508442}.	VATI;FLJ20230	vesicle amine transport 1
Q9H2W6	MRPL46	7	-1.36	-1.16	-1.53	-1.47	-0.88	-1.85	NA	NA	NA
O95299	NDUFA10	8	-1.35	-1.98	-0.65	-0.44	0	-0.15	Accessory subunit of the mitochondrial membrane respiratory chain NADH dehydrogenase (Complex I), that is believed not to be involved in catalysis. Complex I functions in the transfer of electrons from NADH to the respiratory chain. The immediate electron acceptor for the enzyme is believed to be ubiquinone. {ECO:0000269|PubMed:27626371}.	CI-42k	NADH:ubiquinone oxidoreductase subunit A10
O96006	ZBED1	5	-1.35	0.13	-5.18	-1.53	-1.63	-1.31	Binds to 5'-TGTCG[CT]GA[CT]A-3' DNA elements found in the promoter regions of a number of genes related to cell proliferation. Binds to the histone H1 promoter and stimulates transcription. Was first identified as gene weakly similar to Ac transposable elements, but does not code for any transposase activity. {ECO:0000269|PubMed:12663651}.	TRAMP;KIAA0785;DREF;hDREF;ALTE	zinc finger BED-type containing 1
P63000	RAC1	5	-1.35	-2.36	-1.02	-0.72	-0.7	-0.49	Plasma membrane-associated small GTPase which cycles between active GTP-bound and inactive GDP-bound states. In its active state, binds to a variety of effector proteins to regulate cellular responses such as secretory processes, phagocytosis of apoptotic cells, epithelial cell polarization and growth-factor induced formation of membrane ruffles. Rac1 p21/rho GDI heterodimer is the active compone…	TC-25;p21-Rac1;Rac-1	Rac family small GTPase 1
Q10713	PMPCA	19	-1.35	-1.76	-1.18	-0.35	-0.32	-0.38	Cleaves presequences (transit peptides) from mitochondrial protein precursors. {ECO:0000269|PubMed:25808372}.	KIAA0123;Alpha-MPP;INPP5E	peptidase, mitochondrial processing alpha subunit
Q9BX63	BRIP1	7	-1.35	-0.53	-2.28	-0.83	-0.91	-1.28	DNA-dependent ATPase and 5' to 3' DNA helicase required for the maintenance of chromosomal stability. Acts late in the Fanconi anemia pathway, after FANCD2 ubiquitination. Involved in the repair of DNA double-strand breaks by homologous recombination in a manner that depends on its association with BRCA1. {ECO:0000269|PubMed:11301010, ECO:0000269|PubMed:14983014, ECO:0000269|PubMed:16116421, ECO:…	OF;BACH1;FANCJ	BRCA1 interacting protein C-terminal helicase 1
P50748	KNTC1	16	-1.34	-1.8	-0.26	-0.94	-0.29	-1.76	Essential component of the mitotic checkpoint, which prevents cells from prematurely exiting mitosis. Required for the assembly of the dynein-dynactin and MAD1-MAD2 complexes onto kinetochores (PubMed:11146660, PubMed:11590237, PubMed:15824131). Its function related to the spindle assembly machinery is proposed to depend on its association in the mitotic RZZ complex. {ECO:0000269|PubMed:11146660,…	KIAA0166;ROD	kinetochore associated 1
Q13526	PIN1	11	-1.34	-1.38	-1.01	-2.36	-2.42	-2.14	Peptidyl-prolyl cis/trans isomerase (PPIase) that binds to and isomerizes specific phosphorylated Ser/Thr-Pro (pSer/Thr- Pro) motifs. By inducing conformational changes in a subset of phosphorylated proteins, acts as a molecular switch in multiple cellular processes (PubMed:21497122, PubMed:22033920, Ref. 21). Displays a preference for acidic residues located N-terminally to the proline bond to b…	dod	peptidylprolyl cis/trans isomerase, NIMA-interacting 1
Q8WWV3	RTN4IP1	5	-1.34	-0.85	-1.96	-0.62	0.87	-2.22	Plays a role in the regulation of retinal ganglion cell (RGC) neurite outgrowth, and hence in the development of the inner retina and optic nerve. Appears to be a potent inhibitor of regeneration following spinal cord injury. {ECO:0000250|UniProtKB:Q924D0}.	NIMP	reticulon 4 interacting protein 1
Q9NVV4	MTPAP	8	-1.34	-0.73	-2.15	1.25	1.23	1.21	Polymerase that creates the 3' poly(A) tail of mitochondrial transcripts. Can use all four nucleotides, but has higher activity with ATP and UTP (in vitro). Plays a role in replication-dependent histone mRNA degradation. May be involved in the terminal uridylation of mature histone mRNAs before their degradation is initiated. Might be responsible for the creation of some UAA stop codons which are…	FLJ10486;mtPAP;SPAX4;TENT6;PAPD1	mitochondrial poly(A) polymerase
Q9UK61	TASOR	22	-1.34	-1.43	-1.1	-0.5	-0.12	-1.29	Component of the HUSH complex, a multiprotein complex that mediates epigenetic repression. The HUSH complex is recruited to genomic loci rich in H3K9me3 and is probably required to maintain transcriptional silencing by promoting recruitment of SETDB1, a histone methyltransferase that mediates further deposition of H3K9me3. {ECO:0000269|PubMed:26022416}.	se89-1;RAP140;KIAA1105;TASOR;C3orf63	family with sequence similarity 208 member A
Q66GS9	CEP135	3	-1.33	-2	-0.88	0.86	0.58	1.26	Centrosomal protein involved in centriole biogenesis. Acts as a scaffolding protein during early centriole biogenesis. Required for the targeting of centriole satellite proteins to centrosomes such as of PCM1, SSX2IP and CEP290 and recruitment of WRAP73 to centrioles. Also required for centriole-centriole cohesion during interphase by acting as a platform protein for CEP250 at the centriole. {ECO…	FLJ13621;KIAA0635;CEP4	centrosomal protein 135
Q8IWI9	MGA	10	-1.33	-2.15	-0.07	0.77	0.88	0.54	Functions as a dual-specificity transcription factor, regulating the expression of both MAX-network and T-box family target genes. Functions as a repressor or an activator. Binds to 5'-AATTTCACACCTAGGTGTGAAATT-3' core sequence and seems to regulate MYC-MAX target genes. Suppresses transcriptional activation by MYC and inhibits MYC-dependent cell transformation. Function activated by heterodimeriz…	KIAA0518;MAD5;MXD5;FLJ12634	MGA, MAX dimerization protein
Q9H330	TMEM245	3	-1.33	-0.24	-6.83	-0.73	-4.28	1	NA	CG-2;C9orf5	transmembrane protein 245
P16234	PDGFRA	4	-1.32	-0.65	-4.44	-1.03	-1.21	-0.71	Tyrosine-protein kinase that acts as a cell-surface receptor for PDGFA, PDGFB and PDGFC and plays an essential role in the regulation of embryonic development, cell proliferation, survival and chemotaxis. Depending on the context, promotes or inhibits cell proliferation and cell migration. Plays an important role in the differentiation of bone marrow-derived mesenchymal stem cells. Required for n…	CD140a;PDGFR2;GAS9	platelet derived growth factor receptor alpha
P49821	NDUFV1	16	-1.32	-1.04	-1.6	-0.88	-0.57	-1.28	Core subunit of the mitochondrial membrane respiratory chain NADH dehydrogenase (Complex I) that is believed to belong to the minimal assembly required for catalysis. Complex I functions in the transfer of electrons from NADH to the respiratory chain. The immediate electron acceptor for the enzyme is believed to be ubiquinone (By similarity). {ECO:0000250}.	CI-51K	NADH:ubiquinone oxidoreductase core subunit V1
Q15070	OXA1L	3	-1.32	-2.39	-0.69	-1.68	-2.76	-0.36	Required for the insertion of integral membrane proteins into the mitochondrial inner membrane. Essential for the activity and assembly of cytochrome oxidase. Required for the correct biogenesis of ATP synthase and complex I in mitochondria. {ECO:0000269|PubMed:17936786, ECO:0000269|PubMed:7991568}.	MGC133129;OXA1	OXA1L, mitochondrial inner membrane protein
Q15080	NCF4	6	-1.32	-2.52	-0.25	-0.67	-0.36	-0.47	Component of the NADPH-oxidase, a multicomponent enzyme system responsible for the oxidative burst in which electrons are transported from NADPH to molecular oxygen, generating reactive oxidant intermediates. It may be important for the assembly and/or activation of the NADPH-oxidase complex. {ECO:0000269|PubMed:8280052}.	p40phox;SH3PXD4	neutrophil cytosolic factor 4
Q9H5Q4	TFB2M	3	-1.31	-0.76	-2.09	-2.08	-0.52	-3.1	S-adenosyl-L-methionine-dependent methyltransferase which specifically dimethylates mitochondrial 12S rRNA at the conserved stem loop. Also required for basal transcription of mitochondrial DNA, probably via its interaction with POLRMT and TFAM. Stimulates transcription independently of the methyltransferase activity. Compared to TFB1M, it activates transcription of mitochondrial DNA more efficie…	FLJ23182;FLJ22661;Hkp1	transcription factor B2, mitochondrial
Q9Y2Q9	MRPS28	8	-1.31	0.92	-3.61	-0.3	0.39	-1.57	NA	MRP-S28;HSPC007;MRPS35	mitochondrial ribosomal protein S28
O43819	SCO2	4	-1.3	-1.06	-1.51	-0.54	-0.67	-0.57	Acts as a copper chaperone, transporting copper to the Cu(A) site on the cytochrome c oxidase subunit II (MT-CO2/COX2).	SCO1L;MYP6	SCO2, cytochrome c oxidase assembly protein
P56270	MAZ	3	-1.3	-2.47	-0.38	-0.63	-5.25	1.66	May function as a transcription factor with dual roles in transcription initiation and termination. Binds to two sites, ME1a1 and ME1a2, within the MYC promoter having greater affinity for the former. Also binds to multiple G/C-rich sites within the promoter of the Sp1 family of transcription factors. Regulates inflammation-induced expression of serum amyloid A proteins. {ECO:0000269|PubMed:12270…	ZF87;Pur-1;Zif87;ZNF801	MYC associated zinc finger protein
Q06413	MEF2C	4	-1.3	-2.01	-0.76	-0.14	0.33	-2.16	Transcription activator which binds specifically to the MEF2 element present in the regulatory regions of many muscle- specific genes. Controls cardiac morphogenesis and myogenesis, and is also involved in vascular development. Plays an essential role in hippocampal-dependent learning and memory by suppressing the number of excitatory synapses and thus regulating basal and evoked synaptic transmi…	NA	myocyte enhancer factor 2C
Q13190	STX5	5	-1.3	-1.61	0.08	-1.05	-0.35	-4.64	Mediates endoplasmic reticulum to Golgi transport. Together with p115/USO1 and GM130/GOLGA2, involved in vesicle tethering and fusion at the cis-Golgi membrane to maintain the stacked and inter-connected structure of the Golgi apparatus. {ECO:0000250|UniProtKB:Q08851}.	SED5;STX5A	syntaxin 5
Q9NPD8	UBE2T	8	-1.3	-1.14	-1.45	0.25	0.26	-0.01	Accepts ubiquitin from the E1 complex and catalyzes its covalent attachment to other proteins. Catalyzes monoubiquitination. Involved in mitomycin-C (MMC)-induced DNA repair. Acts as a specific E2 ubiquitin-conjugating enzyme for the Fanconi anemia complex by associating with E3 ubiquitin-protein ligase FANCL and catalyzing monoubiquitination of FANCD2, a key step in the DNA damage pathway (PubMe…	HSPC150;FANCT	ubiquitin conjugating enzyme E2 T
Q13217	DNAJC3	5	-1.29	-0.79	-1.74	-0.48	-0.28	-2.84	Involved in the unfolded protein response (UPR) during endoplasmic reticulum (ER) stress. Acts as a negative regulator of the EIF2AK4/GCN2 kinase activity by preventing the phosphorylation of eIF-2-alpha at 'Ser-52' and hence attenuating general protein synthesis under ER stress, hypothermic and amino acid starving stress conditions (By similarity). Co-chaperone of HSPA8/HSC70, it stimulates its …	P58;P58IPK;HP58;ERdj6;PRKRI	DnaJ heat shock protein family (Hsp40) member C3
Q15031	LARS2	6	-1.29	-1.25	-1.32	-0.63	-0.48	-1.05	NA	KIAA0028;LEURS;MGC26121;mtLeuRS	leucyl-tRNA synthetase 2, mitochondrial
Q15361	TTF1	7	-1.29	0.44	-1.84	2.88	3.51	1.09	Multifunctional nucleolar protein that terminates ribosomal gene transcription, mediates replication fork arrest and regulates RNA polymerase I transcription on chromatin. Plays a dual role in rDNA regulation, being involved in both activation and silencing of rDNA transcription. Interaction with BAZ2A/TIP5 recovers DNA-binding activity. {ECO:0000269|PubMed:7597036}.	NA	transcription termination factor 1
Q96CN9	GCC1	3	-1.29	0.29	-6.22	0	0.44	-0.63	Probably involved in maintaining Golgi structure.	FLJ22035;GCC88;GCC1P;MGC20706	GRIP and coiled-coil domain containing 1
Q9GZT3	SLIRP	8	-1.29	-1.01	-1.55	0.4	0.22	0.56	RNA-binding protein that acts as a nuclear receptor corepressor. Probably acts by binding the SRA RNA, and repressing the SRA-mediated nuclear receptor coactivation. Binds the STR7 loop of SRA RNA. Also able to repress glucocorticoid (GR), androgen (AR), thyroid (TR) and VDR-mediated transactivation. {ECO:0000269|PubMed:16762838}.	DC50;C14orf156	SRA stem-loop interacting RNA binding protein
Q9NRN7	AASDHPPT	6	-1.29	-1.14	-1.43	-0.64	-0.87	-0.56	Catalyzes the post-translational modification of target proteins by phosphopantetheine. Can transfer the 4'- phosphopantetheine moiety from coenzyme A to a serine residue of a broad range of acceptors, such as the acyl carrier domain of FASN. {ECO:0000269|PubMed:11286508, ECO:0000269|PubMed:12815048, ECO:0000269|PubMed:18022563}.	LYS5;CGI-80;AASD-PPT;ACPS	aminoadipate-semialdehyde dehydrogenase-phosphopantetheinyl transferase
P11308	ERG	5	-1.28	-1.39	-1.15	-0.29	-1.7	1.16	Transcriptional regulator. May participate in transcriptional regulation through the recruitment of SETDB1 histone methyltransferase and subsequent modification of local chromatin structure.	erg-3;p55	ETS transcription factor ERG
P11498	PC	31	-1.28	-0.86	-1.72	-0.52	-0.35	-0.7	Pyruvate carboxylase catalyzes a 2-step reaction, involving the ATP-dependent carboxylation of the covalently attached biotin in the first step and the transfer of the carboxyl group to pyruvate in the second. Catalyzes in a tissue specific manner, the initial reactions of glucose (liver, kidney) and lipid (adipose tissue, liver, brain) synthesis from pyruvate.	PCB	pyruvate carboxylase
P16383	GCFC2	6	-1.28	-1.37	-1.14	0.04	0.43	-2.96	Factor that represses transcription. It binds to the GC- rich sequences (5'-GCGGGGC-3') present in the epidermal growth factor receptor, beta-actin, and calcium-dependent protease promoters. Involved in pre-mRNA splicing through regulating spliceosome C complex formation. May play a role during late-stage splicing events and turnover of excised inrons. {ECO:0000269|PubMed:24304693}.	DNABF;GCF;TCF9;C2orf3	GC-rich sequence DNA-binding factor 2
P18859	ATP5PF	7	-1.28	-1.07	-1.46	-1.16	-1.17	-1.48	Mitochondrial membrane ATP synthase (F(1)F(0) ATP synthase or Complex V) produces ATP from ADP in the presence of a proton gradient across the membrane which is generated by electron transport complexes of the respiratory chain. F-type ATPases consist of two structural domains, F(1) - containing the extramembraneous catalytic core and F(0) - containing the membrane proton channel, linked together…	CF6;ATP5A;ATP5;ATPM;ATP5J	ATP synthase peripheral stalk subunit F6
P31323	PRKAR2B	3	-1.28	0.82	-17.73	0.06	-0.41	0.78	Regulatory subunit of the cAMP-dependent protein kinases involved in cAMP signaling in cells. Type II regulatory chains mediate membrane association by binding to anchoring proteins, including the MAP2 kinase.	PRKAR2	protein kinase cAMP-dependent type II regulatory subunit beta
O14893	GEMIN2	3	-1.27	1.29	-5.66	2.49	4.24	-0.53	The SMN complex plays a catalyst role in the assembly of small nuclear ribonucleoproteins (snRNPs), the building blocks of the spliceosome. Thereby, plays an important role in the splicing of cellular pre-mRNAs. Most spliceosomal snRNPs contain a common set of Sm proteins SNRPB, SNRPD1, SNRPD2, SNRPD3, SNRPE, SNRPF and SNRPG that assemble in a heptameric protein ring on the Sm site of the small n…	SIP1	gem nuclear organelle associated protein 2
Q6ZN18	AEBP2	3	-1.27	-2.59	-0.09	-1.46	-0.67	-2.95	DNA-binding transcriptional repressor. May interact with and stimulate the activity of the PRC2 complex, which methylates 'Lys-9' and 'Lys-27' residues of histone H3. {ECO:0000269|PubMed:15225548}.	MGC17922	AE binding protein 2
Q9H7Z6	KAT8	4	-1.27	-0.21	-2.41	1.73	3.75	-0.85	NA	NA	NA
O95248	SBF1	7	-1.26	-1.18	-1.29	0.23	-0.01	0.36	Probable pseudophosphatase. Lacks several amino acids in the catalytic pocket which renders it catalytically inactive as a phosphatase. The pocket is however sufficiently preserved to bind phosphorylated substrates, and maybe protect them from phosphatases. Inhibits myoblast differentiation in vitro and induces oncogenic transformation in fibroblasts. According to PubMed:20937701, may function as…	MTMR5;DENND7A	SET binding factor 1
Q96NB3	ZNF830	3	-1.26	-3.88	-0.5	0.3	-0.02	0.81	Acts as an important regulator of the cell cycle that participates in the maintenance of genome integrity. During cell cycle progression in embryonic fibroblast, prevents replication fork collapse, double-strand break formation and cell cycle checkpoint activation. Controls mitotic cell cycle progression and cell survival in rapidly proliferating intestinal epithelium and embryonic stem cells. Du…	MGC20398;OMCG1;CCDC16	zinc finger protein 830
Q9NRP2	CMC2	3	-1.26	-1.52	-1.09	-1.31	-2.5	-0.19	May be involved in cytochrome c oxidase biogenesis. {ECO:0000250}.	DC13;MGC45036;C16orf61	C-X9-C motif containing 2
Q9NZJ0	DTL	6	-1.26	-0.4	-2.43	-0.51	-0.49	-0.37	Substrate-specific adapter of a DCX (DDB1-CUL4-X-box) E3 ubiquitin-protein ligase complex required for cell cycle control, DNA damage response and translesion DNA synthesis. The DCX(DTL) complex, also named CRL4(CDT2) complex, mediates the polyubiquitination and subsequent degradation of CDT1, CDKN1A/p21(CIP1), FBXO18/FBH1, KMT5A and SDE2 (PubMed:16861906, PubMed:16949367, PubMed:16964240, PubMed…	RAMP;L2DTL;DCAF2;CDT2	denticleless E3 ubiquitin protein ligase homolog
P28331	NDUFS1	28	-1.25	-0.99	-1.49	-0.46	-0.42	-0.52	NA	NA	NA
P51530	DNA2	5	-1.25	-0.33	-2.21	-1.1	-0.98	-1.52	Key enzyme involved in DNA replication and DNA repair in nucleus and mitochondrion. Involved in Okazaki fragments processing by cleaving long flaps that escape FEN1: flaps that are longer than 27 nucleotides are coated by replication protein A complex (RPA), leading to recruit DNA2 which cleaves the flap until it is too short to bind RPA and becomes a substrate for FEN1. Also involved in 5'-end r…	KIAA0083;DNA2L	DNA replication helicase/nuclease 2
Q49B96	COX19	3	-1.25	-3	-0.62	0.72	1.53	-0.12	May be required for the assembly of mitochondrial cytochrome c oxidase. {ECO:0000250}.	MGC104475	cytochrome c oxidase assembly factor COX19
Q63HN8	RNF213	76	-1.25	-1.51	-0.95	-1.18	-1.84	-0.01	NA	NA	NA
Q8NB78	KDM1B	5	-1.25	-2.23	-0.88	0.01	-0.27	0.42	Histone demethylase that demethylates 'Lys-4' of histone H3, a specific tag for epigenetic transcriptional activation, thereby acting as a corepressor. Required for de novo DNA methylation of a subset of imprinted genes during oogenesis. Acts by oxidizing the substrate by FAD to generate the corresponding imine that is subsequently hydrolyzed. Demethylates both mono- and di-methylated 'Lys-4' of …	FLJ34109;FLJ33898;dJ298J15.2;bA204B7.3;FLJ43328;LSD2;C6orf193;AOF1	lysine demethylase 1B
Q96EW2	HSPBAP1	3	-1.25	-1.41	-0.57	-2.29	-3.19	0.97	May play a role in cellular stress response. {ECO:0000250}.	FLJ22623;PASS1	HSPB1 associated protein 1
Q96GD4	AURKB	7	-1.25	-1.47	-0.93	-0.5	-0.68	-0.23	NA	NA	NA
Q9H0J9	PARP12	4	-1.25	-4.23	-0.43	-0.5	-3.2	0.81	NA	FLJ22693;PARP-12;ZC3H1;ZC3HDC1	poly(ADP-ribose) polymerase family member 12
Q9NY33	DPP3	23	-1.25	-1.14	-1.35	0.04	0.01	0.26	Cleaves and degrades bioactive peptides, including angiotensin, Leu-enkephalin and Met-enkephalin (PubMed:3233187, PubMed:1515063). Also cleaves Arg-Arg-beta-naphthylamide (in vitro) (PubMed:9425109, PubMed:3233187, PubMed:11209758). {ECO:0000269|PubMed:11209758, ECO:0000269|PubMed:1515063, ECO:0000269|PubMed:3233187, ECO:0000269|PubMed:9425109}.	NA	dipeptidyl peptidase 3
Q9Y508	RNF114	5	-1.25	-0.06	-2.11	-0.43	0.04	-3.2	E3 ubiquitin-protein ligase promoting the ubiquitination and degradation of the CDK inhibitor CDKN1A and probably also CDKN1B and CDKN1C. These activities stimulate cell cycle's G1-to-S phase transition and suppress cellular senescence. May play a role in spermatogenesis. {ECO:0000269|PubMed:23645206}.	PSORS12;ZNF313	ring finger protein 114
O75380	NDUFS6	4	-1.24	-1.11	-1.31	-4.44	-19.38	-3.01	Accessory subunit of the mitochondrial membrane respiratory chain NADH dehydrogenase (Complex I), that is believed not to be involved in catalysis. Complex I functions in the transfer of electrons from NADH to the respiratory chain. The immediate electron acceptor for the enzyme is believed to be ubiquinone. {ECO:0000269|PubMed:27626371}.	CI-13kA	NADH:ubiquinone oxidoreductase subunit S6
P41214	EIF2D	9	-1.24	-1.29	-0.8	-2.43	-2.36	-2.59	NA	NA	NA
Q13395	TARBP1	4	-1.24	-0.25	-18.86	-0.68	0.11	-2.64	Probable S-adenosyl-L-methionine-dependent methyltransferase which methylates RNA molecules such as tRNAs. In case of infection by HIV-1, it binds to the loop region of TAR RNA, a region also bound by RNA polymerase II. Binding of TARBP1 and RNA polymerase II to HIV-1 TAR RNA is mutually exclusive, suggesting that TARBP1 may function alone or in conjunction with HIV-1 Tat to disengage RNA polymer…	TRP-185;TRM3;TRMT3	TAR (HIV-1) RNA binding protein 1
Q14746	COG2	6	-1.24	-1.29	-0.94	-0.49	-0.61	-0.35	Required for normal Golgi morphology and function.	LDLC	component of oligomeric golgi complex 2
Q7L590	MCM10	3	-1.24	-0.69	-15.37	0.44	-0.39	1.96	NA	NA	NA
Q8NFH5	NUP35	7	-1.24	-2.13	0.1	-1.77	-1.64	-1.63	Functions as a component of the nuclear pore complex (NPC). NPC components, collectively referred to as nucleoporins (NUPs). Can play the role of both NPC structural components and of docking or interaction partners for transiently associated nuclear transport factors. May play a role in the association of MAD1 with the NPC. {ECO:0000269|PubMed:15703211}.	MP44	nucleoporin 35
Q9GZN8	C20orf27	3	-1.24	-18.14	16.89	1.17	0.42	16.88	NA	FLJ20550	chromosome 20 open reading frame 27
P20020	ATP2B1	9	-1.23	-0.91	-1.51	-1.48	-3.23	2.23	This magnesium-dependent enzyme catalyzes the hydrolysis of ATP coupled with the transport of calcium out of the cell.	PMCA1	ATPase plasma membrane Ca2+ transporting 1
P33552	CKS2	3	-1.23	-1.56	-0.98	-0.63	-0.5	-0.92	Binds to the catalytic subunit of the cyclin dependent kinases and is essential for their biological function.	NA	CDC28 protein kinase regulatory subunit 2
Q16540	MRPL23	5	-1.23	-1.11	-1.33	-0.47	-0.61	-0.31	NA	L23MRP;RPL23L	mitochondrial ribosomal protein L23
Q99622	C12orf57	4	-1.23	-1.1	-1.34	-0.02	-0.27	0.32	In brain, may be required for corpus callusum development. {ECO:0000269|PubMed:23453666}.	GRCC10;C10	chromosome 12 open reading frame 57
Q9UK45	LSM7	7	-1.23	-1.21	-1.3	-0.09	0.35	-0.93	Binds specifically to the 3'-terminal U-tract of U6 snRNA and is probably a component of the spliceosome.	YNL147W	LSM7 homolog, U6 small nuclear RNA and mRNA degradation associated
Q9Y6V7	DDX49	3	-1.23	-1.62	-0.89	0.02	0.82	-1.16	NA	FLJ10432;Dbp8	DEAD-box helicase 49
O75081	CBFA2T3	3	-1.22	-1.13	-1.31	-0.3	2.72	-3.33	NA	NA	NA
P08559	PDHA1	22	-1.22	0.06	-2.41	0.32	0.2	0.38	NA	NA	NA
P14854	COX6B1	7	-1.22	2.73	-2.62	1.19	4.23	-2.96	Connects the two COX monomers into the physiological dimeric form. {ECO:0000250}.	COXG;COX6B	cytochrome c oxidase subunit 6B1
P35237	SERPINB6	5	-1.22	0.67	-2.57	-0.83	-0.64	-0.23	May be involved in the regulation of serine proteinases present in the brain or extravasated from the blood (By similarity). Inhibitor of cathepsin G, kallikrein-8 and thrombin. May play an important role in the inner ear in the protection against leakage of lysosomal content during stress and loss of this protection results in cell death and sensorineural hearing loss. {ECO:0000250, ECO:0000269|…	PTI;CAP;PI6;DFNB91	serpin family B member 6
Q02241	KIF23	6	-1.22	-0.19	-3.34	2.57	2.68	2.22	Component of the centralspindlin complex that serves as a microtubule-dependent and Rho-mediated signaling required for the myosin contractile ring formation during the cell cycle cytokinesis. Essential for cytokinesis in Rho-mediated signaling. Required for the localization of ECT2 to the central spindle. Plus-end-directed motor enzyme that moves antiparallel microtubules in vitro. {ECO:0000269|…	MKLP1;MKLP-1;KNSL5	kinesin family member 23
Q5BJF6	ODF2	6	-1.22	-2.11	-0.95	0.38	1.84	-2.46	NA	NA	NA
Q8NDT2	RBM15B	9	-1.22	0.5	-2.02	0.06	0.07	0.04	May function in the regulation of alternative or illicit splicing. {ECO:0000269|PubMed:16129689}.	HUMAGCGB;OTT3	RNA binding motif protein 15B
Q8NHH9	ATL2	5	-1.22	-1.2	-1.15	-1.25	-1.46	-0.92	GTPase tethering membranes through formation of trans- homooligomers and mediating homotypic fusion of endoplasmic reticulum membranes. Functions in endoplasmic reticulum tubular network biogenesis (PubMed:18270207, PubMed:19665976, PubMed:27619977). {ECO:0000269|PubMed:18270207, ECO:0000269|PubMed:19665976, ECO:0000269|PubMed:27619977}.	ARL6IP2	atlastin GTPase 2
Q8WWK9	CKAP2	6	-1.22	-0.82	-1.58	-0.85	-1.58	0.1	NA	NA	NA
Q9UJX4	ANAPC5	8	-1.22	-2.84	0.85	0.03	0.64	-1.61	Component of the anaphase promoting complex/cyclosome (APC/C), a cell cycle-regulated E3 ubiquitin ligase that controls progression through mitosis and the G1 phase of the cell cycle. The APC/C complex acts by mediating ubiquitination and subsequent degradation of target proteins: it mainly mediates the formation of 'Lys-11'-linked polyubiquitin chains and, to a lower extent, the formation of 'Ly…	APC5	anaphase promoting complex subunit 5
O95182	NDUFA7	3	-1.21	-1.51	0.04	0.06	2.25	-1.11	Accessory subunit of the mitochondrial membrane respiratory chain NADH dehydrogenase (Complex I), that is believed not to be involved in catalysis. Complex I functions in the transfer of electrons from NADH to the respiratory chain. The immediate electron acceptor for the enzyme is believed to be ubiquinone. {ECO:0000269|PubMed:27626371}.	B14.5a	NADH:ubiquinone oxidoreductase subunit A7
O95202	LETM1	20	-1.21	-1.89	-0.66	-1.19	-1.32	-0.9	Mitochondrial proton/calcium antiporter that mediates proton-dependent calcium efflux from mitochondrion (PubMed:19797662). Crucial for the maintenance of mitochondrial tubular networks and for the assembly of the supercomplexes of the respiratory chain (PubMed:18628306). Required for the maintenance of the tubular shape and cristae organization (PubMed:18628306). In contrast to SLC8B1/NCLX, does…	SLC55A1	leucine zipper and EF-hand containing transmembrane protein 1
P49006	MARCKSL1	4	-1.21	-0.72	-1.66	-0.54	-0.17	-0.98	Controls cell movement by regulating actin cytoskeleton homeostasis and filopodium and lamellipodium formation. When unphosphorylated, induces cell migration. When phosphorylated by MAPK8, induces actin bundles formation and stabilization, thereby reducing actin plasticity, hence restricting cell movement, including neuronal migration. May also affect cancer cell migration. May be involved in cou…	F52;MacMARCKS;MLP1;MLP	MARCKS like 1
Q01581	HMGCS1	23	-1.21	-2.34	-0.58	-0.24	-0.08	-0.67	This enzyme condenses acetyl-CoA with acetoacetyl-CoA to form HMG-CoA, which is the substrate for HMG-CoA reductase.	HMGCS	3-hydroxy-3-methylglutaryl-CoA synthase 1
Q14674	ESPL1	6	-1.21	-1.64	-1.03	0.43	-0.3	1.78	Caspase-like protease, which plays a central role in the chromosome segregation by cleaving the SCC1/RAD21 subunit of the cohesin complex at the onset of anaphase. During most of the cell cycle, it is inactivated by different mechanisms. {ECO:0000269|PubMed:10411507, ECO:0000269|PubMed:11509732}.	KIAA0165;ESP1;SEPA	extra spindle pole bodies like 1, separase
Q9Y2Z4	YARS2	12	-1.21	-1.03	-1.37	0.5	0.39	0.58	Catalyzes the attachment of tyrosine to tRNA(Tyr) in a two-step reaction: tyrosine is first activated by ATP to form Tyr- AMP and then transferred to the acceptor end of tRNA(Tyr). {ECO:0000269|PubMed:15779907, ECO:0000269|PubMed:17997975}.	FLJ13995;CGI-04;mt-TyrRS	tyrosyl-tRNA synthetase 2
P07108	DBI	4	-1.2	-1.38	-0.6	0.22	1.12	0.08	NA	NA	NA
Q05397	PTK2	3	-1.2	1.91	-3.17	2.37	5.23	0.79	Non-receptor protein-tyrosine kinase that plays an essential role in regulating cell migration, adhesion, spreading, reorganization of the actin cytoskeleton, formation and disassembly of focal adhesions and cell protrusions, cell cycle progression, cell proliferation and apoptosis. Required for early embryonic development and placenta development. Required for embryonic angiogenesis, normal card…	FAK;FADK;FAK1;PPP1R71	protein tyrosine kinase 2
Q52LJ0	FAM98B	6	-1.2	-1.32	-0.83	0.16	1.36	-1.42	Positively stimulates PRMT1-induced protein arginine dimethylated arginine methylation (PubMed:28040436). Promotes colorectal cancer cell malignancy (PubMed:28040436). {ECO:0000269|PubMed:28040436}.	FLJ38426	family with sequence similarity 98 member B
Q9NRG9	AAAS	7	-1.2	-1.65	-0.55	-0.21	0.07	-0.57	Plays a role in the normal development of the peripheral and central nervous system.	NA	aladin WD repeat nucleoporin
O43493	TGOLN2	3	-1.19	-1.08	-1.13	1.93	1.43	12.38	NA	NA	NA
Q96Q89	KIF20B	8	-1.19	-2.16	-0.47	0.08	0.02	-0.08	NA	NA	NA
Q9NR12	PDLIM7	5	-1.19	-1.66	-0.93	0.51	0.67	0.39	May function as a scaffold on which the coordinated assembly of proteins can occur. May play a role as an adapter that, via its PDZ domain, localizes LIM-binding proteins to actin filaments of both skeletal muscle and nonmuscle tissues. Involved in both of the two fundamental mechanisms of bone formation, direct bone formation (e.g. embryonic flat bones mandible and cranium), and endochondral bon…	ENIGMA	PDZ and LIM domain 7
P24539	ATP5PB	20	-1.18	-0.94	-1.39	-0.5	-0.44	-0.74	Mitochondrial membrane ATP synthase (F(1)F(0) ATP synthase or Complex V) produces ATP from ADP in the presence of a proton gradient across the membrane which is generated by electron transport complexes of the respiratory chain. F-type ATPases consist of two structural domains, F(1) - containing the extramembraneous catalytic core, and F(0) - containing the membrane proton channel, linked togethe…	ATP5F1	ATP synthase peripheral stalk-membrane subunit b
Q05932	FPGS	10	-1.18	-1.7	-0.87	-0.54	-0.47	-0.8	Catalyzes conversion of folates to polyglutamate derivatives allowing concentration of folate compounds in the cell and the intracellular retention of these cofactors, which are important substrates for most of the folate-dependent enzymes that are involved in one-carbon transfer reactions involved in purine, pyrimidine and amino acid synthesis. Unsubstituted reduced folates are the preferred sub…	NA	folylpolyglutamate synthase
Q13620	CUL4B	13	-1.18	-2.29	-0.69	0.1	-0.38	0.83	NA	NA	NA
Q14061	COX17	4	-1.18	-1.8	-0.85	0.75	0.41	1.27	Copper chaperone for cytochrome c oxidase (COX). Binds two copper ions and deliver them to the Cu(A) site of COX (By similarity). {ECO:0000250}.	NA	cytochrome c oxidase copper chaperone COX17
Q15269	PWP2	14	-1.18	-3.01	0	-0.57	-1.71	1.27	NA	EHOC-17;UTP1;PWP2H	PWP2, small subunit processome component
Q7Z3C6	ATG9A	6	-1.18	-1.01	-1.33	0.11	-0.18	0.57	NA	NA	NA
Q9UL40	ZNF346	4	-1.18	-1.14	-1.38	0.17	1.63	0	Binds with low affinity to dsDNA and ssRNA, and with high affinity to dsRNA, with no detectable sequence specificity (PubMed:24521053). May bind to specific miRNA hairpins (PubMed:28431233). {ECO:0000269|PubMed:24521053, ECO:0000269|PubMed:28431233}.	JAZ;Zfp346	zinc finger protein 346
P62834	RAP1A	4	-1.17	-1.61	-0.68	-1.23	-1.16	-3.12	Induces morphological reversion of a cell line transformed by a Ras oncogene. Counteracts the mitogenic function of Ras, at least partly because it can interact with Ras GAPs and RAF in a competitive manner. Together with ITGB1BP1, regulates KRIT1 localization to microtubules and membranes. Plays a role in nerve growth factor (NGF)-induced neurite outgrowth. Plays a role in the regulation of embr…	KREV-1;SMGP21	RAP1A, member of RAS oncogene family
Q5TKA1	LIN9	3	-1.17	-1.64	-0.97	1.63	3.49	0.02	Acts as a tumor suppressor. Inhibits DNA synthesis. Its ability to inhibit oncogenic transformation is mediated through its association with RB1. Plays a role in the expression of genes required for the G1/S transition. {ECO:0000269|PubMed:15538385, ECO:0000269|PubMed:16730350}.	TGS	lin-9 DREAM MuvB core complex component
Q7KZI7	MARK2	5	-1.17	-1.6	-1.26	2.42	1.31	3.68	Serine/threonine-protein kinase involved in cell polarity and microtubule dynamics regulation. Phosphorylates CRTC2/TORC2, DCX, HDAC7, KIF13B, MAP2, MAP4, MAPT/TAU, and RAB11FIP2. Plays a key role in cell polarity by phosphorylating the microtubule-associated proteins MAP2, MAP4 and MAPT/TAU at KXGS motifs, causing detachment from microtubules, and their disassembly. Regulates epithelial cell pol…	PAR-1;Par1b;PAR-1B;EMK1	microtubule affinity regulating kinase 2
Q9P2W9	STX18	8	-1.17	-1.56	-0.87	0.7	1.59	-1.4	Syntaxin that may be involved in targeting and fusion of Golgi-derived retrograde transport vesicles with the ER. {ECO:0000269|PubMed:15029241}.	Ufe1	syntaxin 18
P61086	UBE2K	12	-1.16	-1.03	-1.27	-0.95	0.15	-1.94	NA	NA	NA
Q5T440	IBA57	9	-1.16	-0.75	-1.63	-0.74	0.06	-1.57	Involved in the maturation of mitochondrial 4Fe-4S proteins functioning late in the iron-sulfur cluster assembly pathway. {ECO:0000269|PubMed:23462291}.	FLJ12734;C1orf69	IBA57, iron-sulfur cluster assembly
Q92542	NCSTN	3	-1.16	-0.04	-5.63	-2.55	-3.03	-1.71	Essential subunit of the gamma-secretase complex, an endoprotease complex that catalyzes the intramembrane cleavage of integral membrane proteins such as Notch receptors and APP (amyloid-beta precursor protein) (PubMed:10993067, PubMed:12679784, PubMed:25043039, PubMed:26280335). The gamma- secretase complex plays a role in Notch and Wnt signaling cascades and regulation of downstream processes v…	KIAA0253;APH2	nicastrin
Q9H8Y5	ANKZF1	10	-1.16	-3.42	-0.5	-1.17	-1.03	-0.88	Plays a role in the cellular response to hydrogen peroxide and in the maintenance of mitochondrial integrity under conditions of cellular stress (PubMed:28302725). Involved in the endoplasmic reticulum (ER)-associated degradation (ERAD) pathway (By similarity). {ECO:0000250, ECO:0000269|PubMed:28302725}.	FLJ10415;ZNF744	ankyrin repeat and zinc finger domain containing 1
Q9P219	CCDC88C	3	-1.16	-2.06	0.42	1.29	1.17	1.12	Negative regulator of the canonical Wnt signaling pathway, acting downstream of DVL to inhibit CTNNB1/Beta-catenin stabilization (By similarity). May also activate the JNK signaling pathway (PubMed:25062847). {ECO:0000250|UniProtKB:Q6VGS5, ECO:0000269|PubMed:25062847}.	DAPLE;HkRP2;SCA40;KIAA1509	coiled-coil domain containing 88C
Q9UHP3	USP25	3	-1.16	2.8	-8.4	-0.34	-0.8	12.44	Deubiquitinating enzyme that hydrolyzes ubiquitin moieties conjugated to substrates and thus, functions to process newly synthesized Ubiquitin, to recycle ubiquitin molecules or to edit polyubiquitin chains and prevents proteasomal degradation of substrates. Hydrolyzes both 'Lys-48'- and 'Lys-63'-linked tetraubiquitin chains.	USP21	ubiquitin specific peptidase 25
O95671	ASMTL	20	-1.15	-1.82	-0.91	-0.68	-0.72	-0.34	Unknown. The presence of the putative catalytic domain of S-adenosyl-L-methionine binding argues for a methyltransferase activity.	NA	acetylserotonin O-methyltransferase like
P13073	COX4I1	18	-1.15	-1.58	-0.88	-0.36	-0.41	-0.31	This protein is one of the nuclear-coded polypeptide chains of cytochrome c oxidase, the terminal oxidase in mitochondrial electron transport.	COX4-1;COX4	cytochrome c oxidase subunit 4I1
P50613	CDK7	4	-1.15	-2.41	1.02	0.13	0.05	-0.01	Serine/threonine kinase involved in cell cycle control and in RNA polymerase II-mediated RNA transcription. Cyclin- dependent kinases (CDKs) are activated by the binding to a cyclin and mediate the progression through the cell cycle. Each different complex controls a specific transition between 2 subsequent phases in the cell cycle. Required for both activation and complex formation of CDK1/cycli…	CAK1;CDKN7;MO15;STK1;CAK	cyclin dependent kinase 7
P82909	MRPS36	5	-1.15	-1.21	-1.11	0.2	-0.22	0.83	NA	NA	NA
Q9NWB6	ARGLU1	10	-1.15	-1.65	-0.21	0.58	1.81	-0.09	Required for the estrogen-dependent expression of ESR1 target genes. Can act in cooperation with MED1. {ECO:0000269|PubMed:21454576}.	FLJ10154	arginine and glutamate rich 1
Q9NYH9	UTP6	13	-1.15	-0.69	-1.53	0.65	0.19	1.35	Involved in nucleolar processing of pre-18S ribosomal RNA. {ECO:0000250}.	HCA66;C17orf40	UTP6, small subunit processome component
Q9UI26	IPO11	8	-1.15	2.8	-2.62	0.25	0.5	0	Functions in nuclear protein import as nuclear transport receptor. Serves as receptor for nuclear localization signals (NLS) in cargo substrates. Is thought to mediate docking of the importin/substrate complex to the nuclear pore complex (NPC) through binding to nucleoporin and the complex is subsequently translocated through the pore by an energy requiring, Ran- dependent mechanism. At the nucle…	RanBP11	importin 11
P36957	DLST	17	-1.14	-0.89	-1.38	-0.19	-0.2	-0.31	Dihydrolipoamide succinyltransferase (E2) component of the 2-oxoglutarate dehydrogenase complex (By similarity). The 2- oxoglutarate dehydrogenase complex catalyzes the overall conversion of 2-oxoglutarate to succinyl-CoA and CO(2) (By similarity). The 2-oxoglutarate dehydrogenase complex is mainly active in the mitochondrion (PubMed:29211711). A fraction of the 2-oxoglutarate dehydrogenase compl…	DLTS	dihydrolipoamide S-succinyltransferase
P52789	HK2	24	-1.14	-2.19	-0.59	0.76	1.66	-0.12	NA	NA	hexokinase 2
Q13405	MRPL49	4	-1.14	-1.01	-1.26	-0.24	-0.28	-0.2	NA	NOF;NOF1;L49mt;C11orf4	mitochondrial ribosomal protein L49
Q16698	DECR1	17	-1.14	-1.04	-1.24	-0.58	-0.48	-0.35	Auxiliary enzyme of beta-oxidation. It participates in the metabolism of unsaturated fatty enoyl-CoA esters having double bonds in both even- and odd-numbered positions. Catalyzes the NADP-dependent reduction of 2,4-dienoyl-CoA to yield trans-3- enoyl-CoA.	SDR18C1;DECR	2,4-dienoyl-CoA reductase 1
Q9H8H3	METTL7A	3	-1.14	-2.53	0.3	0.02	1.13	-4.29	Probable methyltransferase. {ECO:0000250}.	DKFZP586A0522	methyltransferase like 7A
Q9UH73	EBF1	11	-1.14	-0.41	-2.59	0.47	0.78	-0.55	Transcriptional activator which recognizes variations of the palindromic sequence 5'-ATTCCCNNGGGAATT-3'. {ECO:0000250}.	OLF1;COE1;EBF	EBF transcription factor 1
Q9Y5J1	UTP18	17	-1.14	-0.73	-1.62	0.13	0.24	-0.36	Involved in nucleolar processing of pre-18S ribosomal RNA. {ECO:0000250}.	CGI-48;WDR50	UTP18, small subunit processome component
Q6Y7W6	GIGYF2	30	-1.13	-1.6	-0.48	-0.04	0.03	-0.21	NA	NA	NA
Q8N0X4	CLYBL	6	-1.13	-0.6	-2.42	-1.39	-1.15	-2.63	Mitochondrial citramalyl-CoA lyase indirectly involved in the vitamin B12 metabolism (PubMed:29056341). Converts citramalyl-CoA into acetyl-CoA and pyruvate in the C5- dicarboxylate catabolism pathway (PubMed:29056341). The C5- dicarboxylate catabolism pathway is required to detoxify itaconate, a vitamin B12-poisoning metabolite (PubMed:29056341). Also acts as a malate synthase in vitro, converti…	CLB	citrate lyase beta like
Q96IV0	NGLY1	7	-1.13	1.11	-2.04	-0.43	-0.06	-1.04	Specifically deglycosylates the denatured form of N- linked glycoproteins in the cytoplasm and assists their proteasome-mediated degradation. Cleaves the beta-aspartyl- glucosamine (GlcNAc) of the glycan and the amide side chain of Asn, converting Asn to Asp. Prefers proteins containing high- mannose over those bearing complex type oligosaccharides. Can recognize misfolded proteins in the endopla…	FLJ11005;PNG1	N-glycanase 1
Q9BWS9	CHID1	5	-1.13	-1.54	-1.19	0.43	0.2	0.43	Saccharide- and LPS-binding protein with possible roles in pathogen sensing and endotoxin neutralization. Ligand-binding specificity relates to the length of the oligosaccharides, with preference for chitotetraose (in vitro). {ECO:0000269|PubMed:20724479}.	MGC3234;FLJ42707;SI-CLP	chitinase domain containing 1
Q9HD33	MRPL47	7	-1.13	-2.67	-0.93	0.82	2.14	-0.05	NA	NA	NA
Q9NWS0	PIH1D1	6	-1.13	-2.39	-0.35	0.03	-0.09	-0.01	Involved in the assembly of C/D box small nucleolar ribonucleoprotein (snoRNP) particles (PubMed:17636026). Recruits the SWI/SNF complex to the core promoter of rRNA genes and enhances pre-rRNA transcription (PubMed:22368283, PubMed:24036451). Mediates interaction of TELO2 with the R2TP complex which is necessary for the stability of MTOR and SMG1 (PubMed:20864032). Positively regulates the assem…	FLJ20643;Pih1;NOP17	PIH1 domain containing 1
Q9UHK0	NUFIP1	5	-1.13	-5.07	-0.26	0.09	0.51	-1.92	Binds RNA. {ECO:0000269|PubMed:10556305}.	NUFIP	nuclear FMR1 interacting protein 1
P40692	MLH1	7	-1.12	-0.86	-1.37	0.23	0.49	-0.29	Heterodimerizes with PMS2 to form MutL alpha, a component of the post-replicative DNA mismatch repair system (MMR). DNA repair is initiated by MutS alpha (MSH2-MSH6) or MutS beta (MSH2-MSH6) binding to a dsDNA mismatch, then MutL alpha is recruited to the heteroduplex. Assembly of the MutL-MutS- heteroduplex ternary complex in presence of RFC and PCNA is sufficient to activate endonuclease activi…	HNPCC;FCC2;HNPCC2;COCA2	mutL homolog 1
P48739	PITPNB	13	-1.12	-1.13	-0.99	-0.26	-0.31	-0.17	Catalyzes the transfer of PtdIns and phosphatidylcholine between membranes.	VIB1B	phosphatidylinositol transfer protein beta
P49748	ACADVL	10	-1.12	-0.9	-1.31	-0.16	-0.18	-0.24	Active toward esters of long-chain and very long chain fatty acids such as palmitoyl-CoA, mysritoyl-CoA and stearoyl-CoA. Can accommodate substrate acyl chain lengths as long as 24 carbons, but shows little activity for substrates of less than 12 carbons. {ECO:0000269|PubMed:18227065}.	VLCAD;LCACD;ACAD6	acyl-CoA dehydrogenase very long chain
Q16512	PKN1	26	-1.12	-0.59	-1.63	0.26	-0.09	0.59	PKC-related serine/threonine-protein kinase involved in various processes such as regulation of the intermediate filaments of the actin cytoskeleton, cell migration, tumor cell invasion and transcription regulation. Part of a signaling cascade that begins with the activation of the adrenergic receptor ADRA1B and leads to the activation of MAPK14. Regulates the cytoskeletal network by phosphorylat…	DBK;PRK1;PKN;MGC46204;PAK1;PRKCL1	protein kinase N1
Q8N5Q1	FAM71E2	3	-1.12	-2.02	-0.33	-1.99	-2.45	-0.77	NA	DKFZp434G1729;C19orf16	family with sequence similarity 71 member E2
Q96C01	FAM136A	8	-1.12	-0.14	-2.33	-1.18	-1.28	-1.28	NA	FLJ14668	family with sequence similarity 136 member A
Q9NNW5	WDR6	6	-1.12	-3.49	0.79	0.28	0.34	0.35	Enhances the STK11/LKB1-induced cell growth suppression activity. Negative regulator of amino acid starvation-induced autophagy. {ECO:0000269|PubMed:17216128, ECO:0000269|PubMed:22354037}.	NA	WD repeat domain 6
Q9ULL5	PRR12	3	-1.12	-2.1	-0.32	0.07	2.05	-2.95	NA	KIAA1205	proline rich 12
Q9Y2Z9	COQ6	3	-1.12	1.73	-2.17	0.97	1.37	0.08	FAD-dependent monooxygenase required for the C5-ring hydroxylation during ubiquinone biosynthesis. Catalyzes the hydroxylation of 3-polyprenyl-4-hydroxybenzoic acid to 3- polyprenyl-4,5-dihydroxybenzoic acid. The electrons required for the hydroxylation reaction may be funneled indirectly from NADPH via a ferredoxin/ferredoxin reductase system to COQ6. {ECO:0000255|HAMAP-Rule:MF 03193}.	CGI-10	coenzyme Q6, monooxygenase
O95900	TRUB2	3	-1.11	-4.2	-1.13	-0.85	-1.11	-1.39	Minor enzyme contributing to the conversion of uridine to pseudouridine (PSI) at position 390 in mitochondrial COXI (MT- CO1) mRNA and at position 697-699 in mitochondrial COXIII (MT-CO3) mRNA, modulating the efficiency of mitochondrial protein synthesis without changes in transcript abundance or stability. {ECO:0000269|PubMed:27974379}.	CLONE24922	TruB pseudouridine synthase family member 2
P53597	SUCLG1	9	-1.11	-1.54	-0.6	-0.49	-0.35	-0.35	Succinyl-CoA synthetase functions in the citric acid cycle (TCA), coupling the hydrolysis of succinyl-CoA to the synthesis of either ATP or GTP and thus represents the only step of substrate-level phosphorylation in the TCA. The alpha subunit of the enzyme binds the substrates coenzyme A and phosphate, while succinate binding and specificity for either ATP or GTP is provided by different beta sub…	NA	succinate-CoA ligase alpha subunit
P61018	RAB4B	3	-1.11	-0.57	-1.55	-0.87	-0.72	-1.53	Protein transport. Probably involved in vesicular traffic (By similarity). {ECO:0000250}.	FLJ78649;MGC52123	RAB4B, member RAS oncogene family
P61026	RAB10	8	-1.11	-1.99	0.05	-0.88	-1.05	-0.76	The small GTPases Rab are key regulators of intracellular membrane trafficking, from the formation of transport vesicles to their fusion with membranes. Rabs cycle between an inactive GDP-bound form and an active GTP-bound form that is able to recruit to membranes different set of downstream effectors directly responsible for vesicle formation, movement, tethering and fusion (By similarity). That…	NA	RAB10, member RAS oncogene family
Q09472	EP300	7	-1.11	-0.66	-1.5	-2.85	-3.51	-1.11	Functions as histone acetyltransferase and regulates transcription via chromatin remodeling (PubMed:23415232, PubMed:23934153, PubMed:8945521). Acetylates all four core histones in nucleosomes. Histone acetylation gives an epigenetic tag for transcriptional activation (PubMed:23415232, PubMed:23934153, PubMed:8945521). Mediates cAMP-gene regulation by binding specifically to phosphorylated CREB p…	p300;KAT3B	E1A binding protein p300
Q9UGP4	LIMD1	4	-1.11	-0.08	-5.16	0.02	0.03	0.03	Adapter or scaffold protein which participates in the assembly of numerous protein complexes and is involved in several cellular processes such as cell fate determination, cytoskeletal organization, repression of gene transcription, cell-cell adhesion, cell differentiation, proliferation and migration. Positively regulates microRNA (miRNA)-mediated gene silencing and is essential for P-body forma…	NA	LIM domains containing 1
Q9UQN3	CHMP2B	5	-1.11	-2.77	-0.5	-0.17	-0.13	-0.37	Probable core component of the endosomal sorting required for transport complex III (ESCRT-III) which is involved in multivesicular bodies (MVBs) formation and sorting of endosomal cargo proteins into MVBs. MVBs contain intraluminal vesicles (ILVs) that are generated by invagination and scission from the limiting membrane of the endosome and mostly are delivered to lysosomes enabling degradation …	DKFZP564O123;CHMP2.5;VPS2B	charged multivesicular body protein 2B
Q9Y5K8	ATP6V1D	8	-1.11	-2.4	-0.49	-0.31	0.16	-1.07	Subunit of the peripheral V1 complex of vacuolar ATPase. Vacuolar ATPase is responsible for acidifying a variety of intracellular compartments in eukaryotic cells, thus providing most of the energy required for transport processes in the vacuolar system (By similarity). May play a role in cilium biogenesis through regulation of the transport and the localization of proteins to the cilium. {ECO:00…	VATD;VMA8;ATP6M	ATPase H+ transporting V1 subunit D
Q9Y5Q8	GTF3C5	10	-1.11	-0.9	-1.3	0.33	0.76	0.21	NA	NA	NA
Q12899	TRIM26	6	-1.1	-0.57	-2.4	-0.52	0.09	-1.02	E3 ubiquitin-protein ligase which regulates the IFN-beta production and antiviral response downstream of various DNA- encoded pattern-recognition receptors (PRRs). Promotes nuclear IRF3 ubiquitination and proteasomal degradation. Bridges together TBK1 and NEMO during the innate response to viral infection leading to the activation of TBK1. {ECO:0000269|PubMed:25763818, ECO:0000269|PubMed:26611359…	RNF95;ZNF173	tripartite motif containing 26
O75419	CDC45	5	-1.09	1.58	-2.29	0.7	0.36	1.24	Required for initiation of chromosomal DNA replication.	CDC45L2;CDC45L	cell division cycle 45
P48507	GCLM	4	-1.09	0.54	-2.54	1.24	1.25	1.3	NA	GLCLR	glutamate-cysteine ligase modifier subunit
P78549	NTHL1	5	-1.09	-0.73	-1.45	-0.06	-0.09	-0.1	NA	NA	NA
Q92506	HSD17B8	4	-1.09	-0.27	-2.98	1.18	1.46	-1.64	NAD-dependent 17-beta-hydroxysteroid dehydrogenase with highest activity towards estradiol. Has very low activity towards testosterone (PubMed:17978863). The heterotetramer with CBR4 has NADH-dependent 3-ketoacyl-acyl carrier protein reductase activity, and thereby plays a role in mitochondrial fatty acid biosynthesis (PubMed:19571038, PubMed:25203508). Within the heterotetramer, HSD17B8 binds NA…	HKE6;D6S2245E;RING2;KE6;H2-KE6;SDR30C1;FABGL	hydroxysteroid 17-beta dehydrogenase 8
Q99747	NAPG	10	-1.09	-0.97	-1.18	-0.36	-0.22	-0.29	Required for vesicular transport between the endoplasmic reticulum and the Golgi apparatus.	NA	NSF attachment protein gamma
Q9BX68	HINT2	4	-1.09	-1.38	-0.39	0.09	0.43	-0.45	Hydrolase probably involved in steroid biosynthesis. May play a role in apoptosis. Has adenosine phosphoramidase activity. {ECO:0000269|PubMed:16762638, ECO:0000269|PubMed:18653718}.	NA	histidine triad nucleotide binding protein 2
Q9H2J4	PDCL3	7	-1.09	-1.44	-0.83	0.19	0.15	-0.17	Acts as a chaperone for the angiogenic VEGF receptor KDR/VEGFR2, controlling its abundance and inhibiting its ubiquitination and degradation. Modulates the activation of caspases during apoptosis. Is a substrate for Orgyia pseudotsugata multicapsid polyhedrosis virus (OpMNPV) IAP-mediated ubiquitination. {ECO:0000269|PubMed:15371430, ECO:0000269|PubMed:23792958}.	VIAF1	phosducin like 3
Q9UHQ1	NARF	5	-1.09	-1.91	-0.43	-0.67	0.58	-2.39	NA	FLJ10067;DKFZp434G0420;IOP2	nuclear prelamin A recognition factor
Q9Y3B7	MRPL11	6	-1.09	-2.27	-0.4	-0.41	-0.25	-0.99	NA	NA	mitochondrial ribosomal protein L11
O60522	TDRD6	3	-1.08	0.13	-1.45	1.3	0.07	3.16	Involved in spermiogenesis, chromatoid body formation and for proper precursor and mature miRNA expression. {ECO:0000250|UniProtKB:P61407}.	NY-CO-45;bA446F17.4;CT41.2;SPATA36	tudor domain containing 6
P15923	TCF3	10	-1.08	-1.77	-0.5	-0.14	-0.2	-0.21	Transcriptional regulator. Involved in the initiation of neuronal differentiation. Heterodimers between TCF3 and tissue- specific basic helix-loop-helix (bHLH) proteins play major roles in determining tissue-specific cell fate during embryogenesis, like muscle or early B-cell differentiation. Dimers bind DNA on E- box motifs: 5'-CANNTG-3'. Binds to the kappa-E2 site in the kappa immunoglobulin ge…	E2A;ITF1;MGC129647;MGC129648;bHLHb21;VDIR;E47;p75	transcription factor 3
P30291	WEE1	8	-1.08	-2.09	0.2	-0.74	-1.36	0.66	Acts as a negative regulator of entry into mitosis (G2 to M transition) by protecting the nucleus from cytoplasmically activated cyclin B1-complexed CDK1 before the onset of mitosis by mediating phosphorylation of CDK1 on 'Tyr-15'. Specifically phosphorylates and inactivates cyclin B1-complexed CDK1 reaching a maximum during G2 phase and a minimum as cells enter M phase. Phosphorylation of cyclin…	WEE1A	WEE1 G2 checkpoint kinase
Q969Z0	TBRG4	12	-1.08	-1.69	-0.52	-1.72	-1.85	-1.38	NA	NA	NA
Q96BR5	COA7	10	-1.08	-0.63	-1.59	0.32	0.83	-0.53	Required for assembly of mitochondrial respiratory chain complex I and complex IV. {ECO:0000269|PubMed:24333015}.	FLJ12439;RESA1;C1orf163;SELRC1	cytochrome c oxidase assembly factor 7 (putative)
Q9Y580	RBM7	7	-1.08	-1.48	-0.74	-1.15	-1.45	-0.74	Subunit of the trimeric nuclear exosome targeting (NEXT) complex, a complex that directs a subset of non-coding short-lived RNAs for exosomal degradation. The RNA exosome is fundamental for the degradation of RNA in eukaryotic nuclei. Substrate targeting is facilitated by its cofactor MTREX, which links to RNA-binding protein adapters (PubMed:27871484). Possible involved in germ cell RNA processi…	NA	RNA binding motif protein 7
P10809	HSPD1	107	-1.07	-0.83	-1.3	-0.71	-1.14	-0.04	Chaperonin implicated in mitochondrial protein import and macromolecular assembly. Together with Hsp10, facilitates the correct folding of imported proteins. May also prevent misfolding and promote the refolding and proper assembly of unfolded polypeptides generated under stress conditions in the mitochondrial matrix (PubMed:1346131, PubMed:11422376). The functional units of these chaperonins con…	GroEL;HSP60;SPG13	heat shock protein family D (Hsp60) member 1
P14635	CCNB1	5	-1.07	-1.36	-0.58	-1.16	-1.24	-1.99	Essential for the control of the cell cycle at the G2/M (mitosis) transition. {ECO:0000269|PubMed:17495531, ECO:0000269|PubMed:17495533}.	CCNB	cyclin B1
P49407	ARRB1	7	-1.07	-1.58	-0.19	0.97	0.7	1.28	Functions in regulating agonist-mediated G-protein coupled receptor (GPCR) signaling by mediating both receptor desensitization and resensitization processes. During homologous desensitization, beta-arrestins bind to the GPRK-phosphorylated receptor and sterically preclude its coupling to the cognate G- protein; the binding appears to require additional receptor determinants exposed only in the a…	ARR1	arrestin beta 1
Q92466	DDB2	3	-1.07	0.11	-1.72	0.49	0.34	-1.3	Required for DNA repair. Binds to DDB1 to form the UV- damaged DNA-binding protein complex (the UV-DDB complex). The UV- DDB complex may recognize UV-induced DNA damage and recruit proteins of the nucleotide excision repair pathway (the NER pathway) to initiate DNA repair. The UV-DDB complex preferentially binds to cyclobutane pyrimidine dimers (CPD), 6-4 photoproducts (6-4 PP), apurinic sites an…	DDBB;UV-DDB2;FLJ34321;XPE	damage specific DNA binding protein 2
Q9NZW5	MPP6	14	-1.07	-0.99	-1.07	-1.14	-1.02	-1.68	NA	PALS2;VAM-1;p55T	membrane palmitoylated protein 6
Q9UHW5	GPN3	4	-1.07	-0.49	-1.98	0.04	0.25	-1.16	NA	NA	NA
Q9Y608	LRRFIP2	10	-1.07	-1.63	-0.85	0.51	0.73	-0.37	May function as activator of the canonical Wnt signaling pathway, in association with DVL3, upstream of CTNNB1/beta- catenin. Positively regulates Toll-like receptor (TLR) signaling in response to agonist probably by competing with the negative FLII regulator for MYD88-binding. {ECO:0000269|PubMed:15677333, ECO:0000269|PubMed:19265123}.	HUFI-2	LRR binding FLII interacting protein 2
P17980	PSMC3	33	-1.06	-0.4	-1.7	-0.02	-0.12	0.18	Component of the 26S proteasome, a multiprotein complex involved in the ATP-dependent degradation of ubiquitinated proteins. This complex plays a key role in the maintenance of protein homeostasis by removing misfolded or damaged proteins, which could impair cellular functions, and by removing proteins whose functions are no longer required. Therefore, the proteasome participates in numerous cell…	TBP1;TBP-1	proteasome 26S subunit, ATPase 3
O00764	PDXK	4	-1.05	0.3	-2.41	-0.37	-0.52	-0.18	Required for synthesis of pyridoxal-5-phosphate from vitamin B6.	PNK;PKH;FLJ21324;PRED79;FLJ31940;MGC15873;C21orf97;C21orf124	pyridoxal kinase
P11912	CD79A	3	-1.05	-5.16	-0.29	1.73	1.28	2.44	Required in cooperation with CD79B for initiation of the signal transduction cascade activated by binding of antigen to the B-cell antigen receptor complex (BCR) which leads to internalization of the complex, trafficking to late endosomes and antigen presentation. Also required for BCR surface expression and for efficient differentiation of pro- and pre-B-cells. Stimulates SYK autophosphorylation…	MB-1;IGA	CD79a molecule
P30519	HMOX2	19	-1.05	-0.87	-0.41	-0.66	1.82	-1.85	Heme oxygenase cleaves the heme ring at the alpha methene bridge to form biliverdin. Biliverdin is subsequently converted to bilirubin by biliverdin reductase. Under physiological conditions, the activity of heme oxygenase is highest in the spleen, where senescent erythrocytes are sequestrated and destroyed. Heme oxygenase 2 could be implicated in the production of carbon monoxide in brain where …	HO-2	heme oxygenase 2
Q15121	PEA15	3	-1.05	-0.2	-16.53	5.22	7.88	-3.89	Blocks Ras-mediated inhibition of integrin activation and modulates the ERK MAP kinase cascade. Inhibits RPS6KA3 activities by retaining it in the cytoplasm (By similarity). Inhibits both TNFRSF6- and TNFRSF1A-mediated CASP8 activity and apoptosis. Regulates glucose transport by controlling both the content of SLC2A1 glucose transporters on the plasma membrane and the insulin-dependent traffickin…	HMAT1;MAT1;PED;PEA-15;MAT1H;HUMMAT1H;PED-PEA15;PED/PEA15	proliferation and apoptosis adaptor protein 15
Q5HYK3	COQ5	4	-1.05	-0.87	-1.23	0.16	0.53	-0.34	Methyltransferase required for the conversion of 2- polyprenyl-6-methoxy-1,4-benzoquinol (DDMQH2) to 2-polyprenyl-3- methyl-6-methoxy-1,4-benzoquinol (DMQH2). {ECO:0000255|HAMAP- Rule:MF 03191}.	MGC4767	coenzyme Q5, methyltransferase
Q86TX2	ACOT1	12	-1.05	-0.86	-1.22	-0.42	-0.3	-1.02	Acyl-CoA thioesterases are a group of enzymes that catalyze the hydrolysis of acyl-CoAs to the free fatty acid and coenzyme A (CoASH), providing the potential to regulate intracellular levels of acyl-CoAs, free fatty acids and CoASH. Active towards fatty acyl-CoA with chain-lengths of C12-C16 (By similarity). {ECO:0000250}.	ACH2;CTE-1;LACH2	acyl-CoA thioesterase 1
Q9BYD2	MRPL9	7	-1.05	-2.56	-0.18	-0.62	-0.9	-0.19	NA	NA	mitochondrial ribosomal protein L9
Q9H910	JPT2	13	-1.05	-1.15	-0.84	0.64	1.11	-0.22	NA	FLJ13092;L11;KIAA1426;C16orf34;HN1L	Jupiter microtubule associated homolog 2
Q9NX62	IMPAD1	4	-1.05	-1.37	-0.73	0.1	-0.13	-1.93	May play a role in the formation of skeletal elements derived through endochondral ossification, possibly by clearing adenosine 3',5'-bisphosphate produced by Golgi sulfotransferases during glycosaminoglycan sulfation. {ECO:0000250}.	FLJ20421;IMPA3;gPAPP	inositol monophosphatase domain containing 1
O75131	CPNE3	16	-1.04	-2.17	0.46	-0.04	-0.01	-0.07	Calcium-dependent phospholipid-binding protein that plays a role in ERBB2-mediated tumor cell migration in response to growth factor heregulin stimulation (PubMed:20010870). {ECO:0000269|PubMed:20010870}.	NA	copine 3
P05023	ATP1A1	25	-1.04	-1.15	-0.91	-1.07	-1.76	0.11	NA	NA	NA
P51948	MNAT1	3	-1.04	-1.54	-0.78	1.33	2.03	-0.42	Stabilizes the cyclin H-CDK7 complex to form a functional CDK-activating kinase (CAK) enzymatic complex. CAK activates the cyclin-associated kinases CDK1, CDK2, CDK4 and CDK6 by threonine phosphorylation. CAK complexed to the core-TFIIH basal transcription factor activates RNA polymerase II by serine phosphorylation of the repetitive C-terminal domain (CTD) of its large subunit (POLR2A), allowing…	MAT1;RNF66	MNAT1, CDK activating kinase assembly factor
Q05D32	CTDSPL2	8	-1.04	0.14	-2.6	0.14	0.2	-0.25	Probable phosphatase. {ECO:0000250}.	HSPC129;FLJ10523	CTD small phosphatase like 2
Q5T6F2	UBAP2	11	-1.04	-1.27	-0.95	-0.08	0.51	-0.58	NA	KIAA1491;bA176F3.5;FLJ22435	ubiquitin associated protein 2
Q9HAW4	CLSPN	8	-1.04	-1.77	-0.43	-0.15	-0.21	-0.23	Required for checkpoint mediated cell cycle arrest in response to inhibition of DNA replication or to DNA damage induced by both ionizing and UV irradiation. Adapter protein which binds to BRCA1 and the checkpoint kinase CHEK1 and facilitates the ATR- dependent phosphorylation of both proteins. Can also bind specifically to branched DNA structures and may associate with S- phase chromatin followi…	NA	claspin
Q9NX47	MARCHF5	3	-1.04	0.29	-2.52	-1.14	-0.13	-2.01	Mitochondrial E3 ubiquitin-protein ligase that plays a crucial role in the control of mitochondrial morphology by acting as a positive regulator of mitochondrial fission. May play a role in the prevention of cell senescence acting as a regulator of mitochondrial quality control. Promotes ubiquitination of FIS1, DNM1L and MFN1. {ECO:0000269|PubMed:16874301, ECO:0000269|PubMed:17606867, ECO:0000269…	FLJ20445;MARCH-V;MITOL;RNF153	membrane associated ring-CH-type finger 5
Q9NYZ3	GTSE1	7	-1.04	-1.18	-0.76	1.4	0.3	2.65	NA	NA	NA
O95235	KIF20A	12	-1.03	-2.27	-0.27	-0.63	-0.58	-0.67	Mitotic kinesin required for chromosome passenger complex (CPC)-mediated cytokinesis. Following phosphorylation by PLK1, involved in recruitment of PLK1 to the central spindle. Interacts with guanosine triphosphate (GTP)-bound forms of RAB6A and RAB6B. May act as a motor required for the retrograde RAB6 regulated transport of Golgi membranes and associated vesicles along microtubules. Has a micro…	RAB6KIFL	kinesin family member 20A
Q99470	SDF2	3	-1.03	-0.93	-0.8	-0.62	-0.34	-2.65	NA	NA	stromal cell derived factor 2
Q9H7Z7	PTGES2	9	-1.03	-1.07	-0.96	0.39	0.58	-0.01	Isomerase that catalyzes the conversion of PGH2 into the more stable prostaglandin E2 (PGE2). {ECO:0000269|PubMed:12804604, ECO:0000269|PubMed:18198127}.	FLJ14038;C9orf15	prostaglandin E synthase 2
O75947	ATP5PD	13	-1.02	-1.02	-1.02	-0.22	-0.32	-0.07	Mitochondrial membrane ATP synthase (F(1)F(0) ATP synthase or Complex V) produces ATP from ADP in the presence of a proton gradient across the membrane which is generated by electron transport complexes of the respiratory chain. F-type ATPases consist of two structural domains, F(1) - containing the extramembraneous catalytic core, and F(0) - containing the membrane proton channel, linked togethe…	ATPQ;ATP5JD;ATP5H	ATP synthase peripheral stalk subunit d
P82663	MRPS25	4	-1.02	-1.57	-0.48	-0.44	-0.48	-0.69	NA	MRP-S25;FLJ00023;DKFZp313H0817;RPMS25	mitochondrial ribosomal protein S25
Q96G46	DUS3L	13	-1.02	-0.33	-1.98	0.94	1.41	0.47	Catalyzes the synthesis of dihydrouridine, a modified base found in the D-loop of most tRNAs. {ECO:0000250}.	DUS3;FLJ13896	dihydrouridine synthase 3 like
O00217	NDUFS8	8	-1.01	-1.15	-0.92	-0.86	-0.86	-1.03	Core subunit of the mitochondrial membrane respiratory chain NADH dehydrogenase (Complex I) that is believed to belong to the minimal assembly required for catalysis. Complex I functions in the transfer of electrons from NADH to the respiratory chain. The immediate electron acceptor for the enzyme is believed to be ubiquinone (By similarity). May donate electrons to ubiquinone. {ECO:0000250}.	TYKY;CI-23k	NADH:ubiquinone oxidoreductase core subunit S8
O75390	CS	37	-1.01	-0.99	-1.02	0.06	0.06	0.06	NA	NA	citrate synthase
P09669	COX6C	5	-1.01	-1.49	-0.65	-0.14	-0.07	-0.33	This protein is one of the nuclear-coded polypeptide chains of cytochrome c oxidase, the terminal oxidase in mitochondrial electron transport.	NA	cytochrome c oxidase subunit 6C
P52434	POLR2H	5	-1.01	-1.47	-0.61	-0.89	-0.83	-1.98	DNA-dependent RNA polymerase catalyzes the transcription of DNA into RNA using the four ribonucleoside triphosphates as substrates. Common component of RNA polymerases I, II and III which synthesize ribosomal RNA precursors, mRNA precursors and many functional non-coding RNAs, and small RNAs, such as 5S rRNA and tRNAs, respectively. {ECO:0000269|PubMed:9852112}.	RPB8	RNA polymerase II subunit H
P56181	NDUFV3	4	-1.01	-0.14	-5.41	-2.25	-0.47	-4.85	Accessory subunit of the mitochondrial membrane respiratory chain NADH dehydrogenase (Complex I), that is believed not to be involved in catalysis. Complex I functions in the transfer of electrons from NADH to the respiratory chain. The immediate electron acceptor for the enzyme is believed to be ubiquinone. May be the terminally assembled subunit of Complex I. {ECO:0000269|PubMed:27626371}.	CI-10k	NADH:ubiquinone oxidoreductase subunit V3
Q29RF7	PDS5A	38	-1.01	-1.07	-0.85	-0.23	-0.8	0.58	Probable regulator of sister chromatid cohesion in mitosis which may stabilize cohesin complex association with chromatin. May couple sister chromatid cohesion during mitosis to DNA replication. Cohesion ensures that chromosome partitioning is accurate in both meiotic and mitotic cells and plays an important role in DNA repair. {ECO:0000269|PubMed:15855230, ECO:0000269|PubMed:19907496}.	KIAA0648;PIG54;SCC-112	PDS5 cohesin associated factor A
Q7Z6J9	TSEN54	6	-1.01	-0.98	-1.02	-0.3	-0.15	-0.84	Non-catalytic subunit of the tRNA-splicing endonuclease complex, a complex responsible for identification and cleavage of the splice sites in pre-tRNA. It cleaves pre-tRNA at the 5' and 3' splice sites to release the intron. The products are an intron and two tRNA half-molecules bearing 2',3' cyclic phosphate and 5'-OH termini. There are no conserved sequences at the splice sites, but the intron …	SEN54;SEN54L	tRNA splicing endonuclease subunit 54
Q96H79	ZC3HAV1L	12	-1.01	-0.86	-1.14	-0.18	-0.14	-0.15	NA	MGC14289;C7orf39	zinc finger CCCH-type containing, antiviral 1 like
Q9BYN8	MRPS26	6	-1.01	-5.1	1.13	0.92	1.28	0.55	NA	MRP-S13;MRP-S26;RPMS13;dJ534B8.3;C20orf193	mitochondrial ribosomal protein S26
Q9Y3Y2	CHTOP	3	-1.01	-0.36	-1.88	-1.62	-1.64	-2.72	NA	NA	NA
P55196	AFDN	10	-1	-0.94	-1.07	0.19	-0.08	0.73	NA	NA	NA
Q9NXV2	KCTD5	4	-1	-2.23	-0.41	-0.08	0.4	-1.52	Its interaction with CUL3 suggests that it may act as a substrate adapter in some E3 ligase complex. Does not affect the function of Kv channel Kv2.1/KCNB1, Kv1.2/KCNA2, Kv4.2/KCND2 and Kv3.4/KCNC4.	FLJ20040	potassium channel tetramerization domain containing 5
O95834	EML2	3	-0.99	0.47	-17.79	-1.17	-1.13	-1.26	Tubulin binding protein that inhibits microtubule nucleation and growth, resulting in shorter microtubules. {ECO:0000269|PubMed:11694528}.	EMAP2;ELP70;EMAP-2	EMAP like 2
P53985	SLC16A1	8	-0.99	-0.54	-1.48	-0.29	-0.4	-0.2	Proton-coupled monocarboxylate transporter. Catalyzes the rapid transport across the plasma membrane of many monocarboxylates such as lactate, pyruvate, branched-chain oxo acids derived from leucine, valine and isoleucine, and the ketone bodies acetoacetate, beta-hydroxybutyrate and acetate. Depending on the tissue and on cicumstances, mediates the import or export of lactic acid and ketone bodie…	MCT;MCT1	solute carrier family 16 member 1
Q6ZSR9	NA	3	-0.99	-4.07	-0.48	-0.82	1.07	-3.02	NA	NA	NA
Q9H7B2	RPF2	5	-0.99	-0.57	-1.49	-0.33	-0.67	0.14	Involved in ribosomal large subunit assembly. May regulate the localization of the 5S RNP/5S ribonucleoprotein particle to the nucleolus. {ECO:0000269|PubMed:24120868}.	FLJ21087;bA397G5.4;BXDC1	ribosome production factor 2 homolog
Q9P260	RELCH	3	-0.99	-15.93	1.68	-3.34	-4.27	0.09	NA	HsT885;HsT3308;FLJ33841;KIAA1468	RAB11 binding and LisH domain, coiled-coil and HEAT repeat containing
P60520	GABARAPL2	7	-0.98	-0.35	-1.46	0.11	0.65	-0.6	Ubiquitin-like modifier involved in intra-Golgi traffic. Modulates intra-Golgi transport through coupling between NSF activity and SNAREs activation. It first stimulates the ATPase activity of NSF which in turn stimulates the association with GOSR1 (By similarity). Involved in autophagy. Plays a role in mitophagy which contributes to regulate mitochondrial quantity and quality by eliminating the …	GEF2;ATG8;GATE16;GATE-16;ATG8C	GABA type A receptor associated protein like 2
P61106	RAB14	17	-0.98	-0.49	-1.62	0.01	0.27	-0.44	Involved in membrane trafficking between the Golgi complex and endosomes during early embryonic development. Regulates the Golgi to endosome transport of FGFR-containing vesicles during early development, a key process for developing basement membrane and epiblast and primitive endoderm lineages during early postimplantation development. May act by modulating the kinesin KIF16B-cargo association …	FBP;RAB-14	RAB14, member RAS oncogene family
Q14676	MDC1	24	-0.98	-0.35	-1.69	-0.43	-1	0.57	NA	NA	NA
Q9BQE5	APOL2	5	-0.98	-1.11	-0.85	-0.06	-0.1	0.01	NA	NA	NA
O75391	SPAG7	3	-0.97	-0.53	-1.46	0.41	0.19	0.69	NA	FSA-1;ACRP;MGC20134	sperm associated antigen 7
P15291	B4GALT1	5	-0.97	-0.09	-1.92	-0.81	-1.05	-0.55	NA	NA	NA
P82933	MRPS9	11	-0.97	-1.77	-0.82	-0.68	-0.88	-0.59	NA	RPMS9;MRP-S9;S9mt	mitochondrial ribosomal protein S9
P83881	RPL36A	3	-0.97	0.34	-3.59	-2.03	-7.47	0.31	NA	L36A;RPL44	ribosomal protein L36a
Q6IA86	ELP2	10	-0.97	-1.12	-0.53	-0.34	1.09	-2.11	NA	NA	NA
Q6P1M0	SLC27A4	4	-0.97	1.53	-6.53	-1.16	-0.1	-2.88	Involved in translocation of long-chain fatty acids (LFCA) across the plasma membrane. Appears to be the principal fatty acid transporter in small intestinal enterocytes. Plays a role in the formation of the epidermal barrier. Required for fat absorption in early embryogenesis. Has acyl-CoA ligase activity for long-chain and very-long-chain fatty acids (VLCFAs). Indirectly inhibits RPE65 via subs…	FATP4;ACSVL4	solute carrier family 27 member 4
Q9NVM9	INTS13	26	-0.97	-0.39	-1.44	-0.01	0.73	-0.08	Crucial regulator of the mitotic cell cycle and development. At prophase, required for dynein anchoring to the nuclear envelope important for proper centrosome-nucleus coupling. At G2/M phase, may be required for proper spindle formation and execution of cytokinesis. Probable component of the Integrator (INT) complex, a complex involved in the small nuclear RNAs (snRNA) U1 and U2 transcription an…	FLJ10637;NET48;Mat89Bb;SPATA30;C12orf11;ASUN	integrator complex subunit 13
Q9UKT4	FBXO5	3	-0.97	0.37	-4.46	-0.59	-1.34	0.6	Regulates progression through early mitosis by inhibiting the anaphase promoting complex/cyclosome (APC). Binds to the APC activators CDC20 and FZR1/CDH1 to prevent APC activation. Can also bind directly to the APC to inhibit substrate-binding. {ECO:0000269|PubMed:11988738, ECO:0000269|PubMed:16921029}.	FBX5;Fbxo31;EMI1	F-box protein 5
Q9UNL2	SSR3	5	-0.97	3.34	-5.12	1.88	-0.99	3.23	TRAP proteins are part of a complex whose function is to bind calcium to the ER membrane and thereby regulate the retention of ER resident proteins.	TRAPG	signal sequence receptor subunit 3
P49454	CENPF	53	-0.96	-1.06	-0.89	-0.44	-0.41	-0.48	Required for kinetochore function and chromosome segregation in mitosis. Required for kinetochore localization of dynein, LIS1, NDE1 and NDEL1. Regulates recycling of the plasma membrane by acting as a link between recycling vesicles and the microtubule network though its association with STX4 and SNAP25. Acts as a potential inhibitor of pocket protein-mediated cellular processes during developme…	hcp-1	centromere protein F
Q00577	PURA	5	-0.96	-0.45	-1.42	0.17	-0.95	1.32	This is a probable transcription activator that specifically binds the purine-rich single strand of the PUR element located upstream of the MYC gene. May play a role in the initiation of DNA replication and in recombination.	PURALPHA;PUR1;PUR-ALPHA	purine rich element binding protein A
Q6PL18	ATAD2	30	-0.96	-0.66	-1.24	-0.35	-0.14	-0.93	May be a transcriptional coactivator of the nuclear receptor ESR1 required to induce the expression of a subset of estradiol target genes, such as CCND1, MYC and E2F1. May play a role in the recruitment or occupancy of CREBBP at some ESR1 target gene promoters. May be required for histone hyperacetylation. Involved in the estrogen-induced cell proliferation and cell cycle progression of breast ca…	PRO2000;DKFZp667N1320;MGC5254;MGC29843;CT137;ANCCA	ATPase family, AAA domain containing 2
Q9NVH2	INTS7	6	-0.96	-4.22	0.45	0.78	0.56	-0.82	NA	NA	NA
O00330	PDHX	4	-0.95	-5.56	0.07	3.25	2.75	3.99	Required for anchoring dihydrolipoamide dehydrogenase (E3) to the dihydrolipoamide transacetylase (E2) core of the pyruvate dehydrogenase complexes of eukaryotes. This specific binding is essential for a functional PDH complex.	E3BP;proX;PDX1;OPDX;DLDBP	pyruvate dehydrogenase complex component X
P14406	COX7A2	6	-0.95	-1.2	-0.71	-0.72	-1.08	-0.19	This protein is one of the nuclear-coded polypeptide chains of cytochrome c oxidase, the terminal oxidase in mitochondrial electron transport.	COXVIIa-L;COX7AL	cytochrome c oxidase subunit 7A2
P41162	ETV3	3	-0.95	0.26	-1.8	-6.87	-16.31	-5.28	Transcriptional repressor that contribute to growth arrest during terminal macrophage differentiation by repressing target genes involved in Ras-dependent proliferation. Represses MMP1 promoter activity. {ECO:0000269|PubMed:12007404}.	PE-1	ETS variant 3
P98179	RBM3	13	-0.95	-0.87	-1	0.24	0.27	0.04	Cold-inducible mRNA binding protein that enhances global protein synthesis at both physiological and mild hypothermic temperatures. Reduces the relative abundance of microRNAs, when overexpressed. Enhances phosphorylation of translation initiation factors and active polysome formation (By similarity). {ECO:0000250}.	IS1-RNPL	RNA binding motif protein 3
Q15004	PCLAF	5	-0.95	-0.94	-0.94	-0.17	0.09	-0.78	PCNA-binding protein that acts as a regulator of DNA repair during DNA replication. Following DNA damage, the interaction with PCNA is disrupted, facilitating the interaction between monoubiquitinated PCNA and the translesion DNA synthesis DNA polymerase eta (POLH) at stalled replisomes, facilitating the bypass of replication-fork-blocking lesions. Also acts as a regulator of centrosome number. {…	NS5ATP9;OEATC-1;p15(PAF);PAF15;KIAA0101	PCNA clamp associated factor
Q99623	PHB2	32	-0.95	-1.68	-0.45	-0.03	0	-0.31	Acts as a mediator of transcriptional repression by nuclear hormone receptors via recruitment of histone deacetylases (By similarity). Functions as an estrogen receptor (ER)-selective coregulator that potentiates the inhibitory activities of antiestrogens and represses the activity of estrogens. Competes with NCOA1 for modulation of ER transcriptional activity. Probably involved in regulating mit…	REA;BCAP37;Bap37;p22	prohibitin 2
P07205	PGK2	3	-0.94	1.43	-1.93	1.05	0.54	13.8	Essential for sperm motility and male fertility (PubMed:26677959). Not required for the completion of spermatogenesis (By similarity). {ECO:0000250|UniProtKB:P09041, ECO:0000269|PubMed:26677959}.	PGKPS;PGK-2	phosphoglycerate kinase 2
P10515	DLAT	25	-0.94	-0.88	-0.98	-0.25	-0.08	-0.56	The pyruvate dehydrogenase complex catalyzes the overall conversion of pyruvate to acetyl-CoA and CO(2), and thereby links the glycolytic pathway to the tricarboxylic cycle.	PDC-E2;DLTA	dihydrolipoamide S-acetyltransferase
P61006	RAB8A	5	-0.94	-4.37	-0.01	-0.09	0.05	-2.51	The small GTPases Rab are key regulators of intracellular membrane trafficking, from the formation of transport vesicles to their fusion with membranes. Rabs cycle between an inactive GDP-bound form and an active GTP-bound form that is able to recruit to membranes different sets of downstream effectors directly responsible for vesicle formation, movement, tethering and fusion. That Rab is involve…	RAB8;MEL	RAB8A, member RAS oncogene family
P62306	SNRPF	7	-0.94	-1.44	-0.91	0.27	0.02	0.72	Core component of the spliceosomal U1, U2, U4 and U5 small nuclear ribonucleoproteins (snRNPs), the building blocks of the spliceosome. Thereby, plays an important role in the splicing of cellular pre-mRNAs. Most spliceosomal snRNPs contain a common set of Sm proteins SNRPB, SNRPD1, SNRPD2, SNRPD3, SNRPE, SNRPF and SNRPG that assemble in a heptameric protein ring on the Sm site of the small nucle…	Sm-F	small nuclear ribonucleoprotein polypeptide F
Q9Y5J9	TIMM8B	6	-0.94	-0.32	-1.46	-0.01	-0.05	0.34	Probable mitochondrial intermembrane chaperone that participates in the import and insertion of some multi-pass transmembrane proteins into the mitochondrial inner membrane. Also required for the transfer of beta-barrel precursors from the TOM complex to the sorting and assembly machinery (SAM complex) of the outer membrane. Acts as a chaperone-like protein that protects the hydrophobic precursor…	TIM8B;DDP2;FLJ21744;MGC102866;MGC117373	translocase of inner mitochondrial membrane 8 homolog B
O00584	RNASET2	3	-0.93	-0.9	-1.07	0.36	1.4	-0.44	Has ribonuclease activity, with higher activity at acidic pH. Probably is involved in lysosomal degradation of ribosomal RNA (By similarity). Probably plays a role in cellular RNA catabolism. {ECO:0000250, ECO:0000269|PubMed:16620762, ECO:0000269|PubMed:19525954, ECO:0000269|PubMed:22735700}.	RNASE6PL;FLJ10907;bA514O12.3	ribonuclease T2
Q504Q3	PAN2	3	-0.93	0.33	-2.15	-0.13	0.39	-16.87	Catalytic subunit of the poly(A)-nuclease (PAN) deadenylation complex, one of two cytoplasmic mRNA deadenylases involved in general and miRNA-mediated mRNA turnover. PAN specifically shortens poly(A) tails of RNA and the activity is stimulated by poly(A)-binding protein (PABP). PAN deadenylation is followed by rapid degradation of the shortened mRNA tails by the CCR4-NOT complex. Deadenylated mRN…	KIAA0710;hPAN2;USP52	poly(A) specific ribonuclease subunit PAN2
Q8WTV0	SCARB1	5	-0.93	-1.53	0.75	1.38	1.17	0.99	Receptor for different ligands such as phospholipids, cholesterol ester, lipoproteins, phosphatidylserine and apoptotic cells (PubMed:12016218, PubMed:12519372, PubMed:21226579). Receptor for HDL, mediating selective uptake of cholesteryl ether and HDL-dependent cholesterol efflux (PubMed:26965621). Also facilitates the flux of free and esterified cholesterol between the cell surface and apoB-con…	SRB1;CLA-1;CLA1;SR-BI;CD36L1	scavenger receptor class B member 1
Q92734	TFG	6	-0.93	-0.4	-1.56	0.22	1.09	-0.85	Plays a role in the normal dynamic function of the endoplasmic reticulum (ER) and its associated microtubules (PubMed:23479643, PubMed:27813252). {ECO:0000269|PubMed:23479643, ECO:0000269|PubMed:27813252}.	TF6;FLJ36137;SPG57	TRK-fused gene
Q9BQ69	MACROD1	9	-0.93	-0.88	-1.01	-0.37	-0.07	-1.08	Removes ADP-ribose from glutamate residues in proteins bearing a single ADP-ribose moiety. Inactive towards proteins bearing poly-ADP-ribose. Deacetylates O-acetyl-ADP ribose, a signaling molecule generated by the deacetylation of acetylated lysine residues in histones and other proteins. Plays a role in estrogen signaling. Binds to androgen receptor (AR) and amplifies the transactivation functio…	LRP16	MACRO domain containing 1
Q9BTA9	WAC	7	-0.93	-0.39	-1.45	0.2	0.79	-1.31	NA	NA	NA
Q9NVI7	ATAD3A	11	-0.93	-0.93	-0.63	-0.78	-1.14	-0.17	Essential for mitochondrial network organization, mitochondrial metabolism and cell growth at organism and cellular level. May play an important role in mitochondrial protein synthesis. May also participate in mitochondrial DNA replication. May bind to mitochondrial DNA D-loops and contribute to nucleoid stability. Required for enhanced channeling of cholesterol for hormone-dependent steroidogene…	FLJ10709	ATPase family, AAA domain containing 3A
O14646	CHD1	3	-0.92	0.06	-4.19	1.87	19.35	0.55	ATP-dependent chromatin-remodeling factor which functions as substrate recognition component of the transcription regulatory histone acetylation (HAT) complex SAGA. Regulates polymerase II transcription. Also required for efficient transcription by RNA polymerase I, and more specifically the polymerase I transcription termination step. Regulates negatively DNA replication. Not only involved in tr…	NA	chromodomain helicase DNA binding protein 1
O60749	SNX2	22	-0.92	-0.77	-1.04	0.34	0.19	0.48	NA	NA	NA
P36542	ATP5F1C	18	-0.92	-1.39	-0.65	-0.58	-0.53	-0.71	Mitochondrial membrane ATP synthase (F(1)F(0) ATP synthase or Complex V) produces ATP from ADP in the presence of a proton gradient across the membrane which is generated by electron transport complexes of the respiratory chain. F-type ATPases consist of two structural domains, F(1) - containing the extramembraneous catalytic core, and F(0) - containing the membrane proton channel, linked togethe…	ATP5CL1;ATP5C;ATP5C1	ATP synthase F1 subunit gamma
P46734	MAP2K3	12	-0.92	-0.91	-0.98	1.94	1.63	2.28	Dual specificity kinase. Is activated by cytokines and environmental stress in vivo. Catalyzes the concomitant phosphorylation of a threonine and a tyrosine residue in the MAP kinase p38. Part of a signaling cascade that begins with the activation of the adrenergic receptor ADRA1B and leads to the activation of MAPK14. {ECO:0000269|PubMed:21224381, ECO:0000269|PubMed:8622669}.	MEK3;MKK3;MAPKK3;PRKMK3	mitogen-activated protein kinase kinase 3
Q13438	OS9	10	-0.92	-2.05	-0.21	0.28	0.53	-0.84	NA	NA	NA
Q4G0N4	NADK2	13	-0.92	0.12	-2.86	-1.25	-1.26	-1.44	Mitochondrial NAD(+) kinase that phosphorylates NAD(+) to yield NADP(+). Can use both ATP or inorganic polyphosphate as the phosphoryl donor. Also has weak NADH kinase activity in vitro; however NADH kinase activity is much weaker than the NAD(+) kinase activity and may not be relevant in vivo. {ECO:0000269|PubMed:23212377}.	FLJ30596;MNADK;C5orf33;NADKD1	NAD kinase 2, mitochondrial
Q9H1Y0	ATG5	3	-0.92	-1.07	-0.75	0	-0.49	1.02	Involved in autophagic vesicle formation. Conjugation with ATG12, through a ubiquitin-like conjugating system involving ATG7 as an E1-like activating enzyme and ATG10 as an E2-like conjugating enzyme, is essential for its function. The ATG12-ATG5 conjugate acts as an E3-like enzyme which is required for lipidation of ATG8 family proteins and their association to the vesicle membranes. Involved in…	ASP;APG5;hAPG5;APG5L	autophagy related 5
Q9H4I3	TRABD	6	-0.92	-0.9	-0.91	-0.66	2.17	-0.92	NA	PP2447	TraB domain containing
O60763	USO1	30	-0.91	-1.57	0.54	0.34	0.46	0.36	General vesicular transport factor required for intercisternal transport in the Golgi stack; it is required for transcytotic fusion and/or subsequent binding of the vesicles to the target membrane. May well act as a vesicular anchor by interacting with the target membrane and holding the vesicular and target membranes in proximity. {ECO:0000250|UniProtKB:P41542}.	TAP;VDP;p115	USO1 vesicle transport factor
P00505	GOT2	36	-0.91	-1.03	-0.69	-0.89	-1.03	-0.73	Catalyzes the irreversible transamination of the L- tryptophan metabolite L-kynurenine to form kynurenic acid (KA). Plays a key role in amino acid metabolism. Important for metabolite exchange between mitochondria and cytosol. Facilitates cellular uptake of long-chain free fatty acids. {ECO:0000269|PubMed:9537447}.	mitAAT;KATIV;KAT4;KYAT4	glutamic-oxaloacetic transaminase 2
P01137	TGFB1	5	-0.91	-0.76	-1.06	-0.25	0.02	-1.86	Multifunctional protein that controls proliferation, differentiation and other functions in many cell types. Many cells synthesize TGFB1 and have specific receptors for it. It positively and negatively regulates many other growth factors. It plays an important role in bone remodeling as it is a potent stimulator of osteoblastic bone formation, causing chemotaxis, proliferation and differentiation…
P13804	ETFA	24	-0.91	-0.94	-0.89	0.02	-0.06	0.18	Heterodimeric electron transfer flavoprotein that accepts electrons from several mitochondrial dehydrogenases, including acyl-CoA dehydrogenases, glutaryl-CoA and sarcosine dehydrogenase (PubMed:27499296, PubMed:15159392, PubMed:15975918, PubMed:9334218, PubMed:10356313). It transfers the electrons to the main mitochondrial respiratory chain via ETF-ubiquinone oxidoreductase (ETF dehydrogenase) (…	GA2;EMA;MADD	electron transfer flavoprotein subunit alpha
P48147	PREP	13	-0.91	-0.47	-1.43	0.18	0.33	0.18	Cleaves peptide bonds on the C-terminal side of prolyl residues within peptides that are up to approximately 30 amino acids long.	NA	prolyl endopeptidase
Q7LBC6	KDM3B	42	-0.91	-0.93	-0.98	-0.21	-0.36	0.06	Histone demethylase that specifically demethylates 'Lys- 9' of histone H3, thereby playing a central role in histone code. Demethylation of Lys residue generates formaldehyde and succinate. May have tumor suppressor activity. {ECO:0000269|PubMed:16603237}.	KIAA1082;NET22;C5orf7;JMJD1B	lysine demethylase 3B
Q86V48	LUZP1	10	-0.91	-0.58	-1.21	-0.19	0.59	-1.61	NA	LUZP	leucine zipper protein 1
Q96PU4	UHRF2	6	-0.91	-0.75	-1	-1.09	-1.32	-0.69	E3 ubiquitin-protein ligase that is an intermolecular hub protein in the cell cycle network. Through cooperative DNA and histone binding, may contribute to a tighter epigenetic control of gene expression in differentiated cells. Ubiquitinates cyclins, CCND1 and CCNE1, in an apparently phosphorylation-independent manner and induces G1 arrest. Also ubiquitinates PCNP leading to its degradation by t…	RNF107;NIRF;URF2;MGC33463;TDRD23	ubiquitin like with PHD and ring finger domains 2
O60341	KDM1A	21	-0.9	-1.23	-0.49	-0.1	-0.07	-0.24	NA	NA	NA
O60524	NEMF	5	-0.9	1.59	-1.94	-0.02	-0.69	1.21	NA	NA	NA
P23368	ME2	22	-0.9	-0.6	-1.19	-0.73	-0.52	-1.26	NA	NA	malic enzyme 2
P56282	POLE2	4	-0.9	-0.86	-0.93	0.06	-0.09	0.33	Participates in DNA repair and in chromosomal DNA replication.	DPE2	DNA polymerase epsilon 2, accessory subunit
Q9BYT8	NLN	13	-0.9	-0.4	-1.53	-0.16	0.17	-0.51	Hydrolyzes oligopeptides such as neurotensin, bradykinin and dynorphin A. {ECO:0000250}.	KIAA1226;AGTBP	neurolysin
Q9UGM6	WARS2	3	-0.9	-0.91	-0.75	-0.54	-0.41	-1.56	Mitochondrial aminoacyl-tRNA synthetase that activate and transfer the amino acids to their corresponding tRNAs during the translation of mitochondrial genes and protein synthesis. {ECO:0000305|PubMed:28650581}.	TrpRS	tryptophanyl tRNA synthetase 2, mitochondrial
Q9Y237	PIN4	5	-0.9	-0.56	-1.27	1.28	1.57	0.56	NA	NA	NA
Q9Y312	AAR2	9	-0.9	-0.66	-1.1	0.46	1.13	0.21	Component of the U5 snRNP complex that is required for spliceosome assembly and for pre-mRNA splicing. {ECO:0000250|UniProtKB:P32357}.	bA234K24.2;C20orf4	AAR2 splicing factor homolog
O14933	UBE2L6	7	-0.89	-0.5	-1.32	-0.31	-0.2	-0.77	Catalyzes the covalent attachment of ubiquitin or ISG15 to other proteins. Functions in the E6/E6-AP-induced ubiquitination of p53/TP53. Promotes ubiquitination and subsequent proteasomal degradation of FLT3. {ECO:0000269|PubMed:15131269, ECO:0000269|PubMed:16428300, ECO:0000269|PubMed:20508617}.	UBCH8	ubiquitin conjugating enzyme E2 L6
P11802	CDK4	6	-0.89	-1.12	-0.49	-0.81	-0.63	-1.03	Ser/Thr-kinase component of cyclin D-CDK4 (DC) complexes that phosphorylate and inhibit members of the retinoblastoma (RB) protein family including RB1 and regulate the cell-cycle during G(1)/S transition. Phosphorylation of RB1 allows dissociation of the transcription factor E2F from the RB/E2F complexes and the subsequent transcription of E2F target genes which are responsible for the progressi…	PSK-J3	cyclin dependent kinase 4
Q8NHM5	KDM2B	3	-0.89	-3.86	16.25	0.02	-0.79	14.96	NA	NA	NA
Q8TDD1	DDX54	13	-0.89	-0.85	-0.91	-0.18	-1.02	1.32	Has RNA-dependent ATPase activity. Represses the transcriptional activity of nuclear receptors. {ECO:0000269|PubMed:12466272}.	MGC2835;APR-5;DP97	DEAD-box helicase 54
Q96GN5	CDCA7L	9	-0.89	-0.57	-1.23	1.27	1.24	-0.33	NA	NA	NA
Q9BYW2	SETD2	8	-0.89	-0.97	-0.81	-0.64	3.66	-2.28	NA	NA	NA
Q9H9B4	SFXN1	15	-0.89	-0.64	-1.14	-1.09	-1.08	-1.12	Might be involved in the transport of a component required for iron utilization into or out of the mitochondria.	FLJ12876;SLC56A1	sideroflexin 1
Q9UNT1	RABL2B	3	-0.89	-1.24	-0.73	0.14	0.32	-0.07	Small GTPase required for ciliation. Activated in a guanine nucleotide exchange factor (GEF)-independent manner via its intrinsic GDP for GTP nucleotide exchange ability (PubMed:28625565). Involved in ciliary assembly by binding the intraflagellar transport (IFT) complex B from the large pool pre- docked at the base of the cilium and thus triggers its entry into the cilia (PubMed:28625565, PubMed…	NA	RAB, member of RAS oncogene family like 2B
O95429	BAG4	4	-0.88	-0.28	-2.07	-1.03	-0.82	-2.35	Inhibits the chaperone activity of HSP70/HSC70 by promoting substrate release (By similarity). Prevents constitutive TNFRSF1A signaling. Negative regulator of PRKN translocation to damaged mitochondria. {ECO:0000250, ECO:0000269|PubMed:24270810}.	SODD	BCL2 associated athanogene 4
P30048	PRDX3	21	-0.88	0.1	-1.7	-0.06	-0.05	0	NA	NA	NA
P51649	ALDH5A1	13	-0.88	-0.48	-1.23	-0.33	-0.23	-0.76	Catalyzes one step in the degradation of the inhibitory neurotransmitter gamma-aminobutyric acid (GABA). {ECO:0000269|PubMed:19300440}.	SSADH;SSDH	aldehyde dehydrogenase 5 family member A1
Q13576	IQGAP2	7	-0.88	-2.52	1.27	-0.72	-1.04	-0.29	Binds to activated CDC42 and RAC1 but does not seem to stimulate their GTPase activity. Associates with calmodulin.	NA	IQ motif containing GTPase activating protein 2
Q5JTZ9	AARS2	14	-0.88	-0.72	-1.06	-0.58	-0.5	-1.23	Catalyzes the attachment of alanine to tRNA(Ala) in a two-step reaction: alanine is first activated by ATP to form Ala- AMP and then transferred to the acceptor end of tRNA(Ala). Also edits incorrectly charged tRNA(Ala) via its editing domain. {ECO:0000255|HAMAP-Rule:MF 03133}.	KIAA1270;bA444E17.1;AARSL	alanyl-tRNA synthetase 2, mitochondrial
Q5T5X7	BEND3	5	-0.88	-1.12	-0.72	-0.46	-0.28	-1.01	Transcriptional repressor which associates with the NoRC (nucleolar remodeling complex) complex and plays a key role in repressing rDNA transcription. The sumoylated form modulates the stability of the NoRC complex component BAZ2A/TIP5 by controlling its USP21-mediated deubiquitination (PubMed:21914818, PubMed:26100909). Binds to unmethylated major satellite DNA and is involved in the recruitment…	KIAA1553	BEN domain containing 3
Q86YS7	C2CD5	4	-0.88	1.14	-4.72	-0.24	2.15	-0.33	NA	NA	NA
Q9BW19	KIFC1	19	-0.88	-1.3	-0.42	-0.09	-0.23	-0.11	Minus end-directed microtubule-dependent motor required for bipolar spindle formation (PubMed:15843429). May contribute to movement of early endocytic vesicles (By similarity). Regulates cilium formation and structure (By similarity). {ECO:0000250|UniProtKB:Q9QWT9, ECO:0000269|PubMed:15843429}.	HSET;KNSL2	kinesin family member C1
Q9Y2I1	NISCH	8	-0.88	-1.06	-0.69	0.16	-0.32	0.93	NA	NA	NA
O15234	CASC3	3	-0.87	-0.81	-0.87	-0.06	0.11	-0.48	Core component of the splicing-dependent multiprotein exon junction complex (EJC) deposited at splice junctions on mRNAs. The EJC is a dynamic structure consisting of core proteins and several peripheral nuclear and cytoplasmic associated factors that join the complex only transiently either during EJC assembly or during subsequent mRNA metabolism. The EJC marks the position of the exon-exon junc…	MLN51;BTZ	CASC3, exon junction complex subunit
P21912	SDHB	18	-0.87	-0.12	-1.81	-0.78	-0.4	-1.19	Iron-sulfur protein (IP) subunit of succinate dehydrogenase (SDH) that is involved in complex II of the mitochondrial electron transport chain and is responsible for transferring electrons from succinate to ubiquinone (coenzyme Q).	SDH1;SDH	succinate dehydrogenase complex iron sulfur subunit B
P56381	ATP5F1E	3	-0.87	-0.33	-1.49	-0.8	-0.66	-0.68	Mitochondrial membrane ATP synthase (F(1)F(0) ATP synthase or Complex V) produces ATP from ADP in the presence of a proton gradient across the membrane which is generated by electron transport complexes of the respiratory chain. F-type ATPases consist of two structural domains, F(1) - containing the extramembraneous catalytic core, and F(0) - containing the membrane proton channel, linked togethe…	ATP5E	ATP synthase F1 subunit epsilon
Q16795	NDUFA9	13	-0.87	-0.76	-0.96	-0.39	-0.56	-0.09	Accessory subunit of the mitochondrial membrane respiratory chain NADH dehydrogenase (Complex I), that is believed not to be involved in catalysis. Complex I functions in the transfer of electrons from NADH to the respiratory chain. The immediate electron acceptor for the enzyme is believed to be ubiquinone. {ECO:0000269|PubMed:22114105, ECO:0000269|PubMed:27626371}.	SDR22E1;CI-39k;NDUFS2L	NADH:ubiquinone oxidoreductase subunit A9
Q9BUJ2	HNRNPUL1	31	-0.87	-0.67	-1.02	-0.72	-0.8	-0.76	NA	NA	NA
Q9NSV4	DIAPH3	7	-0.87	-1.22	-0.75	-2.7	-1.91	-2.91	NA	NA	NA
Q9UBP6	METTL1	4	-0.87	-0.47	-1.38	-0.38	-1.51	0.83	Catalyzes the formation of N(7)-methylguanine at position 46 (m7G46) in tRNA. {ECO:0000255|HAMAP-Rule:MF 03055, ECO:0000269|PubMed:12403464}.	TRM8;TRMT8;C12orf1	methyltransferase like 1
G9CGD6	NA	3	-0.86	-1.41	-0.37	0.68	2.57	-1.72	NA	NA	NA
O60879	DIAPH2	3	-0.86	-1.64	-0.89	-4.45	-6.3	13.65	Could be involved in oogenesis. Involved in the regulation of endosome dynamics. Implicated in a novel signal transduction pathway, in which isoform 3 and CSK are sequentially activated by RHOD to regulate the motility of early endosomes through interactions with the actin cytoskeleton. {ECO:0000269|PubMed:12577064}.	POF;DIA;POF2;DIA2	diaphanous related formin 2
P09622	DLD	37	-0.86	-0.98	-0.83	0.07	0.65	-0.44	Lipoamide dehydrogenase is a component of the glycine cleavage system as well as an E3 component of three alpha-ketoacid dehydrogenase complexes (pyruvate-, alpha-ketoglutarate-, and branched-chain amino acid-dehydrogenase complex) (PubMed:15712224, PubMed:16442803, PubMed:16770810, PubMed:17404228, PubMed:20160912, PubMed:20385101). The 2-oxoglutarate dehydrogenase complex is mainly active in th…	DLDH;LAD;GCSL	dihydrolipoamide dehydrogenase
P35236	PTPN7	3	-0.86	-1.22	-0.66	0.6	0.42	-3.3	Protein phosphatase that acts preferentially on tyrosine-phosphorylated MAPK1. Plays a role in the regulation of T and B-lymphocyte development and signal transduction. {ECO:0000269|PubMed:10206983, ECO:0000269|PubMed:10559944, ECO:0000269|PubMed:10702794, ECO:0000269|PubMed:1510684, ECO:0000269|PubMed:1530918, ECO:0000269|PubMed:9624114}.	HEPTP;LC-PTP	protein tyrosine phosphatase, non-receptor type 7
P52292	KPNA2	22	-0.86	-1.23	-0.37	-0.93	-0.7	-1.32	Functions in nuclear protein import as an adapter protein for nuclear receptor KPNB1. Binds specifically and directly to substrates containing either a simple or bipartite NLS motif. Docking of the importin/substrate complex to the nuclear pore complex (NPC) is mediated by KPNB1 through binding to nucleoporin FxFG repeats and the complex is subsequently translocated through the pore by an energy …	SRP1alpha;IPOA1;QIP2;RCH1	karyopherin subunit alpha 2
Q92947	GCDH	12	-0.86	-0.88	-0.83	-0.19	-0.19	-0.25	Catalyzes the oxidative decarboxylation of glutaryl-CoA to crotonyl-CoA and CO(2) in the degradative pathway of L-lysine, L-hydroxylysine, and L-tryptophan metabolism. It uses electron transfer flavoprotein as its electron acceptor. Isoform Short is inactive. {ECO:0000269|PubMed:17176108, ECO:0000269|PubMed:6423663, ECO:0000269|PubMed:8541831}.	ACAD5	glutaryl-CoA dehydrogenase
Q96GA3	LTV1	5	-0.86	-0.57	-1.31	0.04	-0.21	0.14	NA	FLJ14909;dJ468K18.4;C6orf93	LTV1 ribosome biogenesis factor
Q96SN8	CDK5RAP2	11	-0.86	-0.78	-0.93	0.04	0.09	-0.04	NA	NA	NA
Q9Y4P1	ATG4B	11	-0.86	-1.96	-0.46	0.81	0.16	1.97	NA	NA	NA
O14561	NDUFAB1	5	-0.85	-1.38	0.15	-0.26	0.12	-1.32	Carrier of the growing fatty acid chain in fatty acid biosynthesis (By similarity). Accessory and non-catalytic subunit of the mitochondrial membrane respiratory chain NADH dehydrogenase (Complex I), which functions in the transfer of electrons from NADH to the respiratory chain (PubMed:27626371). {ECO:0000250|UniProtKB:P52505, ECO:0000269|PubMed:27626371}.	SDAP;FASN2A;ACP;ACP1	NADH:ubiquinone oxidoreductase subunit AB1
O75915	ARL6IP5	6	-0.85	-0.35	-1.41	0.68	0.23	1.39	Regulates intracellular concentrations of taurine and glutamate. Negatively modulates SLC1A1/EAAC1 glutamate transport activity by decreasing its affinity for glutamate in a PKC activity-dependent manner. May be involved in membrane traffic. {ECO:0000250|UniProtKB:Q8R5J9, ECO:0000250|UniProtKB:Q9ES40}.	PRAF3;JWA;GTRAP3-18;DERP11;HSPC127;Yip6b	ADP ribosylation factor like GTPase 6 interacting protein 5
P49815	TSC2	10	-0.85	-0.77	-0.93	-0.05	-0.41	0.55	NA	NA	NA
P52657	GTF2A2	4	-0.85	-1.07	-0.48	-0.34	0.21	-0.38	TFIIA is a component of the transcription machinery of RNA polymerase II and plays an important role in transcriptional activation. TFIIA in a complex with TBP mediates transcriptional activity. {ECO:0000269|PubMed:11030333}.	TFIIA;HsT18745	general transcription factor IIA subunit 2
P61764	STXBP1	5	-0.85	-0.66	-1.06	1.14	3.5	-0.88	May participate in the regulation of synaptic vesicle docking and fusion, possibly through interaction with GTP-binding proteins. Essential for neurotransmission and binds syntaxin, a component of the synaptic vesicle fusion machinery probably in a 1:1 ratio. Can interact with syntaxins 1, 2, and 3 but not syntaxin 4. May play a role in determining the specificity of intracellular fusion reaction…	hUNC18;MUNC18-1;UNC18;rbSec1	syntaxin binding protein 1
Q6P1N9	TATDN1	5	-0.85	-1.21	-0.81	-0.11	0.53	-0.89	Putative deoxyribonuclease. {ECO:0000250}.	CDA11	TatD DNase domain containing 1
Q8IUI8	CRLF3	9	-0.85	-0.06	-1.45	1.14	1.42	-0.85	May play a role in the negative regulation of cell cycle progression. {ECO:0000269|PubMed:19427400}.	CREME9;CYTOR4	cytokine receptor like factor 3
Q8N6M0	OTUD6B	8	-0.85	-0.31	-1.31	-0.21	-0.2	-0.25	NA	CGI-77;DUBA5	OTU domain containing 6B
Q9Y2V7	COG6	4	-0.85	-2.19	-0.67	0.31	0.06	0.41	Required for normal Golgi function. {ECO:0000250}.	COD2;KIAA1134	component of oligomeric golgi complex 6
Q9Y697	NFS1	7	-0.85	-0.5	-1.22	0.02	0.39	-0.61	Catalyzes the removal of elemental sulfur from cysteine to produce alanine. It supplies the inorganic sulfur for iron- sulfur (Fe-S) clusters. May be involved in the biosynthesis of molybdenum cofactor. {ECO:0000269|PubMed:18650437}.	NifS;IscS	NFS1, cysteine desulfurase
O00233	PSMD9	7	-0.84	-1.66	-0.27	0.05	-0.33	0.59	Acts as a chaperone during the assembly of the 26S proteasome, specifically of the base subcomplex of the PA700/19S regulatory complex (RC). During the base subcomplex assembly is part of an intermediate PSMD9:PSMC6:PSMC3 module, also known as modulator trimer complex; PSMD9 is released during the further base assembly process. {ECO:0000269|PubMed:19490896}.	p27;Rpn4	proteasome 26S subunit, non-ATPase 9
O43432	EIF4G3	17	-0.84	-1.07	-0.4	1	0.99	0.42	Probable component of the protein complex eIF4F, which is involved in the recognition of the mRNA cap, ATP-dependent unwinding of 5'-terminal secondary structure and recruitment of mRNA to the ribosome. Thought to be a functional homolog of EIF4G1. {ECO:0000269|PubMed:9418880}.	eIF4GII	eukaryotic translation initiation factor 4 gamma 3
P10606	COX5B	11	-0.84	-2.23	0.16	0.21	-0.95	1.74	This protein is one of the nuclear-coded polypeptide chains of cytochrome c oxidase, the terminal oxidase in mitochondrial electron transport.	NA	cytochrome c oxidase subunit 5B
P25490	YY1	8	-0.84	-0.22	-1.92	0.03	0.81	-0.19	Multifunctional transcription factor that exhibits positive and negative control on a large number of cellular and viral genes by binding to sites overlapping the transcription start site. Binds to the consensus sequence 5'-CCGCCATNTT-3'; some genes have been shown to contain a longer binding motif allowing enhanced binding; the initial CG dinucleotide can be methylated greatly reducing the bindi…	NF-E1;DELTA;UCRBP;YIN-YANG-1;INO80S	YY1 transcription factor
P40429	RPL13A	21	-0.84	-0.81	-0.9	-0.19	-0.11	-0.4	Associated with ribosomes but is not required for canonical ribosome function and has extra-ribosomal functions. Component of the GAIT (gamma interferon-activated inhibitor of translation) complex which mediates interferon-gamma-induced transcript-selective translation inhibition in inflammation processes. Upon interferon-gamma activation and subsequent phosphorylation dissociates from the riboso…	L13A;TSTA1	ribosomal protein L13a
P67870	CSNK2B	10	-0.84	-0.81	-0.86	-0.28	0.03	-0.86	Participates in Wnt signaling (By similarity). Plays a complex role in regulating the basal catalytic activity of the alpha subunit. {ECO:0000250, ECO:0000269|PubMed:11239457, ECO:0000269|PubMed:16818610}.	Ckb1;Ckb2	casein kinase 2 beta
Q00325	SLC25A3	13	-0.84	-1.31	-0.15	-0.39	0.06	-0.88	Transport of phosphate groups from the cytosol to the mitochondrial matrix. Phosphate is cotransported with H(+). May play a role regulation of the mitochondrial permeability transition pore (mPTP).	PHC	solute carrier family 25 member 3
Q01664	TFAP4	9	-0.84	-0.37	-1.24	-0.99	-0.43	-1.19	Transcription factor that activates both viral and cellular genes by binding to the symmetrical DNA sequence 5'- CAGCTG-3'.	AP-4;bHLHc41	transcription factor AP-4
Q15404	RSU1	5	-0.84	-1.35	-0.06	0.05	0.68	-0.2	Potentially plays a role in the Ras signal transduction pathway. Capable of suppressing v-Ras transformation in vitro.	RSP-1;FLJ31034	Ras suppressor protein 1
Q7L4I2	RSRC2	8	-0.84	0.1	-1.61	-0.74	0.26	-1.4	NA	FLJ11021	arginine and serine rich coiled-coil 2
Q8N9N7	LRRC57	4	-0.84	-1.43	-0.09	0.38	-0.67	3.45	NA	FLJ36812	leucine rich repeat containing 57
Q969U7	PSMG2	8	-0.84	-1.97	-0.13	0.64	0.33	1.11	Chaperone protein which promotes assembly of the 20S proteasome as part of a heterodimer with PSMG1. The PSMG1-PSMG2 heterodimer binds to the PSMA5 and PSMA7 proteasome subunits, promotes assembly of the proteasome alpha subunits into the heteroheptameric alpha ring and prevents alpha ring dimerization. {ECO:0000269|PubMed:16251969, ECO:0000269|PubMed:17707236}.	HCCA3;MDS003;MGC15092;CLAST3;HsT1707;PAC2;TNFSF5IP1	proteasome assembly chaperone 2
Q96C36	PYCR2	14	-0.84	-0.75	-0.93	0.31	-0.04	0.88	Housekeeping enzyme that catalyzes the last step in proline biosynthesis. In some cell types, such as erythrocytes, its primary function may be the generation of NADP(+). Can utilize both NAD and NADP. Has higher affinity for NADP, but higher catalytic efficiency with NADH (PubMed:2722838, PubMed:6894153). Involved in cellular response to oxidative stress (PubMed:25865492). {ECO:0000269|PubMed:25…	P5CR2	pyrroline-5-carboxylate reductase 2
Q96HA7	TONSL	16	-0.84	-1.38	0.1	-0.05	-0.55	0.81	Component of the MMS22L-TONSL complex, a complex that stimulates the recombination-dependent repair of stalled or collapsed replication forks. The MMS22L-TONSL complex is required to maintain genome integrity during DNA replication by promoting homologous recombination-mediated repair of replication fork- associated double-strand breaks. It may act by mediating the assembly of RAD51 filaments on …	IKBR;NFKBIL2	tonsoku like, DNA repair protein
Q9BRP1	PDCD2L	3	-0.84	-0.63	-1.04	0.61	0.73	0.4	Over-expression suppresses AP1, CREB, NFAT, and NF-kB transcriptional activation, and delays cell cycle progression at S phase. {ECO:0000269|PubMed:17393540}.	MGC13096	programmed cell death 2 like
Q02952	AKAP12	35	-0.83	-1.15	-0.49	-0.07	0.52	-0.62	Anchoring protein that mediates the subcellular compartmentation of protein kinase A (PKA) and protein kinase C (PKC).	AKAP250;SSeCKS	A-kinase anchoring protein 12
Q14257	RCN2	8	-0.83	-0.51	-1.29	-2.27	-1.88	-2.81	Not known. Binds calcium.	ERC-55;E6BP;ERC55;TCBP49	reticulocalbin 2
Q15067	ACOX1	18	-0.83	-0.95	-0.24	-0.62	-0.6	-0.82	NA	NA	NA
Q8IV38	ANKMY2	4	-0.83	-0.98	-0.56	1.46	0.41	18.54	May be involved in the trafficking of signaling proteins to the cilia. {ECO:0000250}.	DKFZP564O043;ZMYND20	ankyrin repeat and MYND domain containing 2
Q96B26	EXOSC8	3	-0.83	-1.57	-0.49	0.3	1.33	-1.61	Non-catalytic component of the RNA exosome complex which has 3'->5' exoribonuclease activity and participates in a multitude of cellular RNA processing and degradation events. In the nucleus, the RNA exosome complex is involved in proper maturation of stable RNA species such as rRNA, snRNA and snoRNA, in the elimination of RNA processing by-products and non-coding 'pervasive' transcripts, such as…	OIP2;RRP43;bA421P11.3;Rrp43p;EAP2;p9;CIP3	exosome component 8
Q9NP50	SINHCAF	3	-0.83	0.67	-2.47	-1.74	0.38	-2.4	Subunit of the Sin3 deacetylase complex (Sin3/HDAC), this subunit is important for the repression of genes encoding components of the TGF-beta signaling pathway (PubMed:22865885, PubMed:22984288). Core component of a SIN3A complex (composed of at least SINHCAF, SIN3A, HDAC1, SAP30, RBBP4, OGT and TET1) present in embryonic stem (ES) cells. Promotes the stability of SIN3A and its presence on chrom…	TERA;C12orf14;FAM60A	SIN3-HDAC complex associated factor
O94822	LTN1	3	-0.82	-0.29	-1.85	-0.72	-0.34	-0.81	NA	NA	NA
O94829	IPO13	3	-0.82	-1.44	0.1	-2.22	-15.9	-0.22	Functions in nuclear protein import as nuclear transport receptor. Serves as receptor for nuclear localization signals (NLS) in cargo substrates. Is thought to mediate docking of the importin/substrate complex to the nuclear pore complex (NPC) through binding to nucleoporin and the complex is subsequently translocated through the pore by an energy requiring, Ran- dependent mechanism. At the nucle…	IMP13;KIAA0724;RANBP13	importin 13
P31040	SDHA	31	-0.82	-0.76	-0.88	-0.55	-0.47	-0.76	Flavoprotein (FP) subunit of succinate dehydrogenase (SDH) that is involved in complex II of the mitochondrial electron transport chain and is responsible for transferring electrons from succinate to ubiquinone (coenzyme Q) (PubMed:24781757). Can act as a tumor suppressor (PubMed:20484225). {ECO:0000269|PubMed:20484225, ECO:0000305|PubMed:24781757}.	FP;SDHF;SDH2	succinate dehydrogenase complex flavoprotein subunit A
P40818	USP8	17	-0.82	-1.09	0.02	1.6	1.93	0.75	Hydrolase that can remove conjugated ubiquitin from proteins and therefore plays an important regulatory role at the level of protein turnover by preventing degradation. Converts both 'Lys-48' an 'Lys-63'-linked ubiquitin chains. Catalytic activity is enhanced in the M phase. Involved in cell proliferation. Required to enter into S phase in response to serum stimulation. May regulate T-cell anerg…	HumORF8;KIAA0055;UBPY;SPG59	ubiquitin specific peptidase 8
P55809	OXCT1	25	-0.82	-0.48	-1.14	-0.49	-0.39	-0.67	Key enzyme for ketone body catabolism. Transfers the CoA moiety from succinate to acetoacetate. Formation of the enzyme-CoA intermediate proceeds via an unstable anhydride species formed between the carboxylate groups of the enzyme and substrate.	SCOT;OXCT	3-oxoacid CoA-transferase 1
P61244	MAX	4	-0.82	-0.92	0.49	0.62	0.28	-0.64	NA	NA	NA
Q04323	UBXN1	11	-0.82	0.05	-1.9	-0.26	0.64	-1.75	Ubiquitin-binding protein that plays a role in the modulation of innate immune response. Blocks both the RIG-I-like receptors (RLR) and NF-kappa-B pathways. Following viral infection, UBXN1 is induced and recruited to the RLR component MAVS. In turn, interferes with MAVS oligomerization, and disrupts the MAVS/TRAF3/TRAF6 signalosome. This function probably serves as a brake to prevent excessive R…	LOC51035;2B28;UBXD10;SAKS1	UBX domain protein 1
Q14135	VGLL4	4	-0.82	-1.41	-0.51	0.43	0.3	0.62	May act as a specific coactivator for the mammalian TEFs. {ECO:0000250}.	KIAA0121	vestigial like family member 4
Q76FK4	NOL8	6	-0.82	-1.12	-0.64	0.05	1.17	-5.36	NA	NA	NA
Q8NBU5	ATAD1	7	-0.82	2.85	-3.48	-0.11	-0.25	-0.79	ATPase that plays a critical role in regulating the surface expression of AMPA receptors (AMPAR), thereby regulating synaptic plasticity and learning and memory. Required for NMDA- stimulated AMPAR internalization and inhibition of GRIA1 and GRIA2 recycling back to the plasma membrane; these activities are ATPase-dependent (By similarity). {ECO:0000250}.	FLJ14600	ATPase family, AAA domain containing 1
Q9UBP0	SPAST	10	-0.82	-0.23	-1.42	-1.68	-1.96	-1.18	ATP-dependent microtubule severing protein that specifically recognizes and cuts microtubules that are polyglutamylated (PubMed:11809724, PubMed:15716377, PubMed:16219033, PubMed:17389232, PubMed:20530212, PubMed:22637577, PubMed:26875866). Preferentially recognizes and acts on microtubules decorated with short polyglutamate tails: severing activity increases as the number of glutamates per tubul…	FSP2;ADPSP;KIAA1083;SPG4	spastin
Q9Y6E2	BZW2	24	-0.82	-0.8	-0.79	0.08	0.13	-0.04	May be involved in neuronal differentiation. {ECO:0000250}.	HSPC028;MST017;MSTP017	basic leucine zipper and W2 domains 2
O43156	TTI1	12	-0.81	-0.63	-0.98	-0.08	-0.36	0.16	Regulator of the DNA damage response (DDR). Part of the TTT complex that is required to stabilize protein levels of the phosphatidylinositol 3-kinase-related protein kinase (PIKK) family proteins. The TTT complex is involved in the cellular resistance to DNA damage stresses, like ionizing radiation (IR), ultraviolet (UV) and mitomycin C (MMC). Together with the TTT complex and HSP90 may participa…	smg-10;KIAA0406	TELO2 interacting protein 1
P23434	GCSH	3	-0.81	-0.55	-1.05	-0.82	-0.84	-0.69	The glycine cleavage system catalyzes the degradation of glycine. The H protein (GCSH) shuttles the methylamine group of glycine from the P protein (GLDC) to the T protein (GCST). {ECO:0000269|PubMed:1671321}.	NA	glycine cleavage system protein H
Q03188	CENPC	11	-0.81	-2.45	3.75	0.41	0.58	0.07	Component of the CENPA-NAC (nucleosome-associated) complex, a complex that plays a central role in assembly of kinetochore proteins, mitotic progression and chromosome segregation. The CENPA-NAC complex recruits the CENPA-CAD (nucleosome distal) complex and may be involved in incorporation of newly synthesized CENPA into centromeres. CENPC recruits DNA methylation and DNMT3B to both centromeric a…	CENP-C;hcp-4;MIF2;CENPC1	centromere protein C
Q14C86	GAPVD1	20	-0.81	-0.27	-1.21	0.06	-0.12	0.21	NA	NA	NA
Q6P1R4	DUS1L	6	-0.81	-0.28	-1.25	0.57	0.86	0.33	Catalyzes the synthesis of dihydrouridine, a modified base found in the D-loop of most tRNAs. {ECO:0000250}.	PP3111;DUS1	dihydrouridine synthase 1 like
Q8TEK3	DOT1L	3	-0.81	-16.89	-0.22	0.15	-0.46	0.87	Histone methyltransferase. Methylates 'Lys-79' of histone H3. Nucleosomes are preferred as substrate compared to free histones. Binds to DNA.	KIAA1814;DOT1;KMT4	DOT1 like histone lysine methyltransferase
Q9NQS1	AVEN	4	-0.81	-0.17	-1.46	0.61	0.63	0.57	Protects against apoptosis mediated by Apaf-1.	PDCD12	apoptosis and caspase activation inhibitor
Q9UJZ1	STOML2	10	-0.81	-1.13	-0.53	-0.38	-0.75	0.21	Mitochondrial protein that probably regulates the biogenesis and the activity of mitochondria. Stimulates cardiolipin biosynthesis, binds cardiolipin-enriched membranes where it recruits and stabilizes some proteins including prohibitin and may therefore act in the organization of functional microdomains in mitochondrial membranes. Through regulation of the mitochondrial function may play a role …	SLP-2;HSPC108	stomatin like 2
A6NHZ5	LRRC14B	6	-0.8	-0.71	-0.86	-1.42	-1.08	-2.46	NA	NA	leucine rich repeat containing 14B
O95229	ZWINT	4	-0.8	-0.93	-0.64	-0.49	-0.01	-0.85	Part of the MIS12 complex, which is required for kinetochore formation and spindle checkpoint activity. Required to target ZW10 to the kinetochore at prometaphase. {ECO:0000269|PubMed:15094189, ECO:0000269|PubMed:15485811, ECO:0000269|PubMed:15824131, ECO:0000269|PubMed:16732327}.	KNTC2AP;SIP30;Zwint1	ZW10 interacting kinetochore protein
P30049	ATP5F1D	9	-0.8	-1.19	-0.57	-0.33	-0.21	-0.54	Mitochondrial membrane ATP synthase (F(1)F(0) ATP synthase or Complex V) produces ATP from ADP in the presence of a proton gradient across the membrane which is generated by electron transport complexes of the respiratory chain. F-type ATPases consist of two structural domains, F(1) - containing the extramembraneous catalytic core, and F(0) - containing the membrane proton channel, linked togethe…	ATP5D	ATP synthase F1 subunit delta
Q13111	CHAF1A	19	-0.8	-0.63	-0.97	0.01	0.27	-0.83	Core component of the CAF-1 complex, a complex thought to mediate chromatin assembly in DNA replication and DNA repair. Assembles histone octamers onto replicating DNA in vitro. CAF-1 performs the first step of the nucleosome assembly process, bringing newly synthesized histones H3 and H4 to replicating DNA; histones H2A/H2B can bind to this chromatin precursor subsequent to DNA replication to co…	CAF1P150;CAF1B;CAF-1;CAF1;P150;MGC71229	chromatin assembly factor 1 subunit A
Q6VY07	PACS1	6	-0.8	-0.71	-0.86	0.4	0.74	0.08	NA	NA	NA
Q96AB3	ISOC2	5	-0.8	-1.16	-0.47	0.14	-0.09	0.48	NA	FLJ23469	isochorismatase domain containing 2
Q96DV4	MRPL38	7	-0.8	-3.72	-0.17	-0.36	0.2	-1.93	NA	RPML3;MRP-L3;HSPC262;MGC4810	mitochondrial ribosomal protein L38
P12235	SLC25A4	8	-0.79	-1.05	-0.24	-1.3	-2.69	1.74	Involved in mitochondrial ADP/ATP transport. Catalyzes the exchange of cytoplasmic ADP with mitochondrial ATP across the mitochondrial inner membrane. {ECO:0000269|PubMed:27693233}.	T1;PEO3;PEO2;ANT1	solute carrier family 25 member 4
P51151	RAB9A	3	-0.79	1.18	-17.95	-3.16	-4.52	-1.8	Involved in the transport of proteins between the endosomes and the trans Golgi network. Involved in the recruitment of SGSM2 to melanosomes and is required for the proper trafficking of melanogenic enzymes TYR, TYRP1 and DCT/TYRP2 to melanosomes in melanocytes. {ECO:0000250|UniProtKB:P24408, ECO:0000250|UniProtKB:Q9R0M6}.	RAB9	RAB9A, member RAS oncogene family
P55199	ELL	3	-0.79	-0.88	0.23	-1.64	-3.59	0.45	Elongation factor component of the super elongation complex (SEC), a complex required to increase the catalytic rate of RNA polymerase II transcription by suppressing transient pausing by the polymerase at multiple sites along the DNA. Elongation factor component of the little elongation complex (LEC), a complex required to regulate small nuclear RNA (snRNA) gene transcription by RNA polymerase I…	Men;ELL1;PPP1R68;C19orf17	elongation factor for RNA polymerase II
Q15058	KIF14	10	-0.79	-0.44	-1.21	-0.44	-0.49	-0.28	Microtubule motor protein that binds to microtubules with high affinity through each tubulin heterodimer and has an ATPase activity (By similarity). Plays a role in many processes like cell division, cytokinesis and also in cell proliferation and apoptosis (PubMed:24784001, PubMed:16648480). During cytokinesis, targets to central spindle and midbody through its interaction with PRC1 and CIT respe…	KIAA0042	kinesin family member 14
Q5JRX3	PITRM1	25	-0.79	-0.33	-1.23	-0.82	-0.51	-1.23	NA	NA	NA
Q7Z417	NUFIP2	15	-0.79	-0.16	-1.56	-0.41	-0.23	-0.7	Binds RNA. {ECO:0000269|PubMed:12837692}.	KIAA1321;MGC117262;PIG1;182-FIP;FIP-82;82-FIP	nuclear FMR1 interacting protein 2
Q9BSJ2	TUBGCP2	20	-0.79	-0.75	-0.83	-0.35	0.15	-1.04	Gamma-tubulin complex is necessary for microtubule nucleation at the centrosome.	GCP2;Spc97p;SPBC97	tubulin gamma complex associated protein 2
Q9NXH9	TRMT1	18	-0.79	-0.7	-0.84	-0.07	0.68	-0.75	Dimethylates a single guanine residue at position 26 of most tRNAs using S-adenosyl-L-methionine as donor of the methyl groups.	FLJ20244;TRM1	tRNA methyltransferase 1
O00214	LGALS8	3	-0.78	0.02	-1.81	4.45	4.75	-0.95	NA	NA	NA
O95400	CD2BP2	6	-0.78	0.17	-2.05	0.13	0.01	0.34	Involved in pre-mRNA splicing as component of the U5 snRNP complex that is involved in spliceosome assembly. {ECO:0000269|PubMed:15840814}.	LIN1;Snu40;PPP1R59;U5-52K	CD2 cytoplasmic tail binding protein 2
O96019	ACTL6A	21	-0.78	-0.75	-0.83	-0.06	0.11	-0.57	Involved in transcriptional activation and repression of select genes by chromatin remodeling (alteration of DNA-nucleosome topology). Component of SWI/SNF chromatin remodeling complexes that carry out key enzymatic activities, changing chromatin structure by altering DNA-histone contacts within a nucleosome in an ATP-dependent manner. Required for maximal ATPase activity of SMARCA4/BRG1/BAF190A …	Actl6;BAF53A;Arp4;Baf53a;INO80K	actin like 6A
Q5QJE6	DNTTIP2	18	-0.78	-0.99	-0.53	0.59	0.25	1.1	Regulates the transcriptional activity of DNTT and ESR1. May function as a chromatin remodeling protein. {ECO:0000269|PubMed:12786946, ECO:0000269|PubMed:15047147}.	HSU15552;ERBP;TdIF2	deoxynucleotidyltransferase terminal interacting protein 2
Q8IWX8	CHERP	18	-0.78	-0.86	-0.69	0.17	0.25	-0.22	Involved in calcium homeostasis, growth and proliferation. {ECO:0000269|PubMed:10794731, ECO:0000269|PubMed:12656674}.	ERPROT213-21;DAN16	calcium homeostasis endoplasmic reticulum protein
Q8N6F7	GCSAM	3	-0.78	-0.53	-1	0.01	0.28	-0.75	Involved in the negative regulation of lymphocyte motility. It mediates the migration-inhibitory effects of IL6. Serves as a positive regulator of the RhoA signaling pathway. Enhancement of RhoA activation results in inhibition of lymphocyte and lymphoma cell motility by activation of its downstream effector ROCK. Is a regulator of B-cell receptor signaling, that acts through SYK kinase activatio…	MGC40441;HGAL;GCET2	germinal center associated signaling and motility
Q96BH1	RNF25	3	-0.78	-1.49	-0.22	-1.63	-1.35	-2.5	E3 ubiquitin-protein ligase that mediates ubiquitination and subsequent proteasomal degradation of NKD2 (By similarity). Stimulates transcription mediated by NF-kappa-B. {ECO:0000250, ECO:0000269|PubMed:12748188}.	AO7;FLJ13906	ring finger protein 25
Q96Q15	SMG1	11	-0.78	-0.06	-1.24	0.58	0.36	1.04	Serine/threonine protein kinase involved in both mRNA surveillance and genotoxic stress response pathways. Recognizes the substrate consensus sequence [ST]-Q. Plays a central role in nonsense-mediated decay (NMD) of mRNAs containing premature stop codons by phosphorylating UPF1/RENT1. Recruited by release factors to stalled ribosomes together with SMG8 and SMG9 (forming the SMG1C protein kinase c…	LIP;KIAA0421;ATX	SMG1, nonsense mediated mRNA decay associated PI3K related kinase
Q9BUB7	TMEM70	6	-0.78	-0.3	-1.29	-0.06	-0.42	0.45	Involved in biogenesis of mitochondrial ATP synthase. {ECO:0000269|PubMed:18953340, ECO:0000269|PubMed:20937241}.	FLJ20533	transmembrane protein 70
Q9H269	VPS16	11	-0.78	-0.36	-1.28	-0.54	-0.16	-1.42	Plays a role in vesicle-mediated protein trafficking to lysosomal compartments including the endocytic membrane transport and autophagic pathways. Believed to act as a core component of the putative HOPS and CORVET endosomal tethering complexes which are proposed to be involved in the Rab5-to-Rab7 endosome conversion probably implicating MON1A/B, and via binding SNAREs and SNARE complexes to medi…	NA	VPS16, CORVET/HOPS core subunit
Q9UBW7	ZMYM2	7	-0.78	-0.92	-0.49	-0.15	-0.44	0.24	NA	NA	NA
Q9ULR3	PPM1H	7	-0.78	-1.58	-0.09	-0.18	1.06	-1.21	Dephosphorylates CDKN1B at 'Thr-187', thus removing a signal for proteasomal degradation. {ECO:0000269|PubMed:22586611}.	KIAA1157;FLJ13253;NERPP-2C;ARHCL1	protein phosphatase, Mg2+/Mn2+ dependent 1H
O75027	ABCB7	8	-0.77	-1.09	-0.53	-0.58	-0.62	-0.47	Could be involved in the transport of heme from the mitochondria to the cytosol. Plays a central role in the maturation of cytosolic iron-sulfur (Fe/S) cluster-containing proteins.	EST140535;Atm1p;ASAT;ABC7	ATP binding cassette subfamily B member 7
P50416	CPT1A	9	-0.77	0.03	-2.03	-0.02	-0.08	-0.37	Catalyzes the transfer of the acyl group of long-chain fatty acid-CoA conjugates onto carnitine, an essential step for the mitochondrial uptake of long-chain fatty acids and their subsequent beta-oxidation in the mitochondrion. Plays an important role in triglyceride metabolism.	CPT1-L;L-CPT1;CPT1	carnitine palmitoyltransferase 1A
P99999	CYCS	7	-0.77	-1.11	-0.14	1.3	1.41	1.03	Electron carrier protein. The oxidized form of the cytochrome c heme group can accept an electron from the heme group of the cytochrome c1 subunit of cytochrome reductase. Cytochrome c then transfers this electron to the cytochrome oxidase complex, the final protein carrier in the mitochondrial electron-transport chain.	HCS;CYC	cytochrome c, somatic
Q5T653	MRPL2	3	-0.77	-0.87	-0.69	-0.4	-0.58	-0.13	NA	MRP-L14;RPML14;CGI-22	mitochondrial ribosomal protein L2
Q8N5L8	RPP25L	4	-0.77	-0.78	-0.69	-0.72	-1.34	0.19	May be a component of ribonuclease P or MRP.	bA296L22.5;MGC29635;C9orf23	ribonuclease P/MRP subunit p25 like
Q96BK5	PINX1	9	-0.77	-0.59	-0.93	0.19	0.25	-0.12	Microtubule-binding protein essential for faithful chromosome segregation. Mediates TRF1 and TERT accumulation in nucleolus and enhances TRF1 binding to telomeres. Inhibits telomerase activity. May inhibit cell proliferation and act as tumor suppressor. {ECO:0000269|PubMed:15381700, ECO:0000269|PubMed:17198684, ECO:0000269|PubMed:19117989, ECO:0000269|PubMed:19265708, ECO:0000269|PubMed:19393617,…	PinX1;LPTL;LPTS;FLJ20565;MGC8850;Gno1;Pxr1	PIN2 (TERF1) interacting telomerase inhibitor 1
Q9H0L4	CSTF2T	8	-0.77	-0.99	-0.45	-1.12	-0.97	-1.22	May play a significant role in AAUAAA-independent mRNA polyadenylation in germ cells. Directly involved in the binding to pre-mRNAs (By similarity). {ECO:0000250}.	DKFZp434C1013;KIAA0689;CstF-64T;tauCstF-64	cleavage stimulation factor subunit 2 tau variant
Q9NY93	DDX56	12	-0.77	-1.37	-0.46	-0.32	-0.23	-0.26	May play a role in later stages of the processing of the pre-ribosomal particles leading to mature 60S ribosomal subunits. Has intrinsic ATPase activity.	NOH61	DEAD-box helicase 56
Q9P0J0	NDUFA13	6	-0.77	-1.33	-0.42	0.14	0.22	-0.22	Accessory subunit of the mitochondrial membrane respiratory chain NADH dehydrogenase (Complex I), that is believed not to be involved in catalysis (PubMed:27626371). Complex I functions in the transfer of electrons from NADH to the respiratory chain. The immediate electron acceptor for the enzyme is believed to be ubiquinone (PubMed:27626371). Involved in the interferon/all-trans-retinoic acid (I…	CGI-39;CDA016;GRIM-19;GRIM19;B16.6	NADH:ubiquinone oxidoreductase subunit A13
Q9UK76	JPT1	6	-0.77	-0.73	-0.82	-0.06	0.41	-0.38	Modulates negatively AKT-mediated GSK3B signaling (PubMed:21323578, PubMed:22155408). Induces CTNNB1 'Ser-33' phosphorylation and degradation through the suppression of the inhibitory 'Ser-9' phosphorylation of GSK3B, which represses the function of the APC:CTNNB1:GSK3B complex and the interaction with CDH1/E-cadherin in adherent junctions (PubMed:25169422). Plays a role in the regulation of cell…	ARM2;HN1A;HN1	Jupiter microtubule associated homolog 1
Q9Y305	ACOT9	4	-0.77	-0.8	-0.8	-2.14	-1.51	-5.03	Acyl-CoA thioesterases are a group of enzymes that catalyze the hydrolysis of acyl-CoAs to the free fatty acid and coenzyme A (CoASH), providing the potential to regulate intracellular levels of acyl-CoAs, free fatty acids and CoASH. Active on long chain acyl-CoAs.	CGI-16;MT-ACT48;ACATE2	acyl-CoA thioesterase 9
Q9Y6Y0	IVNS1ABP	12	-0.77	-0.65	-0.89	-0.07	-0.2	0.03	NA	NA	NA
P49189	ALDH9A1	24	-0.76	0.04	-1.38	-0.41	-0.51	-0.14	Converts gamma-trimethylaminobutyraldehyde into gamma- butyrobetaine. Catalyzes the irreversible oxidation of a broad range of aldehydes to the corresponding acids in an NAD-dependent reaction. {ECO:0000269|PubMed:10702312}.	E3;ALDH7;ALDH4;ALDH9	aldehyde dehydrogenase 9 family member A1
P50213	IDH3A	16	-0.76	-0.86	-0.67	-0.07	-0.06	-0.04	Catalytic subunit of the enzyme which catalyzes the decarboxylation of isocitrate (ICT) into alpha-ketoglutarate. The heterodimer composed of the alpha (IDH3A) and beta (IDH3B) subunits and the heterodimer composed of the alpha (IDH3A) and gamma (IDH3G) subunits, have considerable basal activity but the full activity of the heterotetramer (containing two subunits of IDH3A, one of IDH3B and one of…	NA	isocitrate dehydrogenase 3 (NAD(+)) alpha
Q13370	PDE3B	3	-0.76	0.46	-2.12	1.64	1.89	-2.82	Cyclic nucleotide phosphodiesterase with a dual- specificity for the second messengers cAMP and cGMP, which are key regulators of many important physiological processes. May play a role in fat metabolism. Regulates cAMP binding of RAPGEF3. Through simultaneous binding to RAPGEF3 and PIK3R6 assembles a signaling complex in which the PI3K gamma complex is activated by RAPGEF3 and which is involved …	HcGIP1	phosphodiesterase 3B
Q15007	WTAP	12	-0.76	-0.73	-0.77	-1.07	-1.56	-0.09	Regulatory subunit of the WMM N6-methyltransferase complex, a multiprotein complex that mediates N6-methyladenosine (m6A) methylation of some adenosine residues of some mRNAs and plays a role in the efficiency of mRNA splicing, processing and mRNA stability. Required for accumulation of METTL3 and METTL14 to nuclear speckle (PubMed:24316715, PubMed:24407421, PubMed:24981863). Acts as a mRNA splic…	KIAA0105;MGC3925;Mum2	WT1 associated protein
Q16254	E2F4	4	-0.76	-0.53	-0.97	0.29	0.05	0.67	Transcription activator that binds DNA cooperatively with DP proteins through the E2 recognition site, 5'-TTTC[CG]CGC- 3' found in the promoter region of a number of genes whose products are involved in cell cycle regulation or in DNA replication. The DRTF1/E2F complex functions in the control of cell-cycle progression from G1 to S phase. E2F4 binds with high affinity to RBL1 and RBL2. In some in…	E2F-4	E2F transcription factor 4
Q5T8D3	ACBD5	4	-0.76	-0.6	-0.89	0.21	-0.27	0.95	NA	NA	NA
Q7L576	CYFIP1	21	-0.76	-0.38	-1.17	0.08	0.22	-0.09	Component of the CYFIP1-EIF4E-FMR1 complex which binds to the mRNA cap and mediates translational repression. In the CYFIP1-EIF4E-FMR1 complex this subunit is an adapter between EIF4E and FMR1. Promotes the translation repression activity of FMR1 in brain probably by mediating its association with EIF4E and mRNA (By similarity). Regulates formation of membrane ruffles and lamellipodia. Plays a ro…	KIAA0068;P140SRA-1;SHYC	cytoplasmic FMR1 interacting protein 1
Q86TU7	SETD3	8	-0.76	-0.27	-1.26	0.45	1.02	-1.09	NA	NA	NA
Q8IV50	LYSMD2	7	-0.76	0.15	-2.14	-0.57	-0.96	-0.07	NA	MGC35274	LysM domain containing 2
Q8N6R0	EEF1AKNMT	8	-0.76	-1.12	-0.23	-0.18	-0.11	-0.56	NA	NA	NA
Q9BRS2	RIOK1	14	-0.76	-1.49	-0.24	-0.24	-0.3	-0.17	Involved in the final steps of cytoplasmic maturation of the 40S ribosomal subunit. Involved in processing of 18S-E pre- rRNA to the mature 18S rRNA. Required for the recycling of NOB1 and PNO1 from the late 40S precursor (PubMed:22072790). The association with the very late 40S subunit intermediate may involve a translation-like checkpoint point cycle preceeding the binding to the 60S ribosomal …	AD034;FLJ30006;bA288G3.1;RRP10	RIO kinase 1
Q9BT78	COPS4	12	-0.76	-2.52	0.08	-1.53	-2.52	-0.65	Component of the COP9 signalosome complex (CSN), a complex involved in various cellular and developmental processes. The CSN complex is an essential regulator of the ubiquitin (Ubl) conjugation pathway by mediating the deneddylation of the cullin subunits of SCF-type E3 ligase complexes, leading to decrease the Ubl ligase activity of SCF-type complexes such as SCF, CSA or DDB2. Also involved in t…	CSN4	COP9 signalosome subunit 4
Q9UHV9	PFDN2	14	-0.76	-0.94	-0.68	0.11	-0.32	0.8	Binds specifically to cytosolic chaperonin (c-CPN) and transfers target proteins to it. Binds to nascent polypeptide chain and promotes folding in an environment in which there are many competing pathways for nonnative proteins. {ECO:0000269|PubMed:9630229}.	NA	prefoldin subunit 2
P47985	UQCRFS1	8	-0.75	-0.56	-0.94	-0.31	-0.41	-0.32	Cytochrome b-c1 complex subunit Rieske, mitochondrial: Component of the mitochondrial ubiquinol-cytochrome c reductase complex dimer (complex III dimer), which is a respiratory chain that generates an electrochemical potential coupled to ATP synthesis (PubMed:28673544). Incorporation of UQCRFS1 is the penultimate step in complex III assembly (By similarity). {ECO:0000250|UniProtKB:P47985, ECO:000…	RIS1;RIP1;UQCR5;RISP	ubiquinol-cytochrome c reductase, Rieske iron-sulfur polypeptide 1
P60660	MYL6	13	-0.75	-0.44	-1.03	-0.61	-0.75	-0.3	Regulatory light chain of myosin. Does not bind calcium.	ESMLC;MLC3NM;MLC1SM	myosin light chain 6
Q16352	INA	4	-0.75	-0.58	-0.87	0.05	-1.27	16.64	Class-IV neuronal intermediate filament that is able to self-assemble. It is involved in the morphogenesis of neurons. It may form an independent structural network without the involvement of other neurofilaments or it may cooperate with NF-L to form the filamentous backbone to which NF-M and NF-H attach to form the cross-bridges.	NF-66;NEF5	internexin neuronal intermediate filament protein alpha
Q8IY37	DHX37	15	-0.75	-1.37	0.74	-0.57	-0.27	-0.98	NA	KIAA1517;MGC4322;MGC2695;Dhr1;DDX37	DEAH-box helicase 37
Q8N8A6	DDX51	9	-0.75	-0.71	-0.79	-0.31	0	-1.52	ATP-binding RNA helicase involved in the biogenesis of 60S ribosomal subunits. {ECO:0000250}.	NA	DEAD-box helicase 51
Q8NAV1	PRPF38A	4	-0.75	0.36	-2.05	-0.21	-0.19	-0.29	May be required for pre-mRNA splicing. {ECO:0000305}.	FLJ14936;Prp38	pre-mRNA processing factor 38A
Q99584	S100A13	4	-0.75	-0.74	-0.49	-0.51	0.06	-1.17	Plays a role in the export of proteins that lack a signal peptide and are secreted by an alternative pathway. Binds two calcium ions per subunit. Binds one copper ion. Binding of one copper ion does not interfere with calcium binding. Required for the copper-dependent stress-induced export of IL1A and FGF1. The calcium-free protein binds to lipid vesicles containing phosphatidylserine, but not to…	NA	S100 calcium binding protein A13
Q9H8G2	CAAP1	3	-0.75	-0.11	-14.4	-0.7	-1.31	0.44	Anti-apoptotic protein that modulates a caspase-10 dependent mitochondrial caspase-3/9 feedback amplification loop. {ECO:0000269|PubMed:21980415}.	FLJ13657;CAAP;C9orf82	caspase activity and apoptosis inhibitor 1
Q9UH65	SWAP70	18	-0.75	-1.22	-0.27	0.65	0.65	1.04	Phosphatidylinositol 3,4,5-trisphosphate-dependent guanine nucleotide exchange factor (GEF) which, independently of RAS, transduces signals from tyrosine kinase receptors to RAC. It also mediates signaling of membrane ruffling. Regulates the actin cytoskeleton as an effector or adapter protein in response to agonist stimulated phosphatidylinositol (3,4)-bisphosphate production and cell protrusion…	KIAA0640;SWAP-70	switching B cell complex subunit SWAP70
O43299	AP5Z1	4	-0.74	-0.51	-0.97	0.08	-0.16	0.46	As part of AP-5, a probable fifth adaptor protein complex it may be involved in endosomal transport. According to PubMed:20613862 it is a putative helicase required for efficient homologous recombination DNA double-strand break repair. {ECO:0000269|PubMed:20613862, ECO:0000269|PubMed:22022230}.	SPG48;zeta;KIAA0415	adaptor related protein complex 5 subunit zeta 1
O75940	SMNDC1	12	-0.74	-0.41	-1.08	-0.5	-0.42	-0.35	Necessary for spliceosome assembly. Overexpression causes apoptosis. {ECO:0000269|PubMed:11331295, ECO:0000269|PubMed:11331595, ECO:0000269|PubMed:9817934}.	SPF30;SMNR;TDRD16C	survival motor neuron domain containing 1
P08579	SNRPB2	9	-0.74	-0.05	-1.35	-0.39	-0.58	-0.28	Involved in pre-mRNA splicing. This protein is associated with snRNP U2. It binds stem loop IV of U2 snRNA only in presence of the U2A' protein.	Msl1;U2B''	small nuclear ribonucleoprotein polypeptide B2
P31930	UQCRC1	32	-0.74	-0.88	-0.62	-0.54	-0.57	-0.49	This is a component of the ubiquinol-cytochrome c reductase complex (complex III or cytochrome b-c1 complex), which is part of the mitochondrial respiratory chain. This protein may mediate formation of the complex between cytochromes c and c1.	D3S3191;QCR1;UQCR1	ubiquinol-cytochrome c reductase core protein 1
P35749	MYH11	4	-0.74	-0.21	-1.25	-0.53	0.8	-3.32	Muscle contraction.	SMMHC;SMHC	myosin heavy chain 11
P43897	TSFM	10	-0.74	-0.14	-1.45	-0.67	-0.8	-0.59	Associates with the EF-Tu.GDP complex and induces the exchange of GDP to GTP. It remains bound to the aminoacyl-tRNA.EF- Tu.GTP complex up to the GTP hydrolysis stage on the ribosome. {ECO:0000255|HAMAP-Rule:MF 03135, ECO:0000269|PubMed:27677415}.	EF-Tsmt;EF-TS	Ts translation elongation factor, mitochondrial
P49366	DHPS	8	-0.74	-0.38	-1.09	-0.05	-0.04	-0.19	Catalyzes the NAD-dependent oxidative cleavage of spermidine and the subsequent transfer of the butylamine moiety of spermidine to the epsilon-amino group of a specific lysine residue of the eIF-5A precursor protein to form the intermediate deoxyhypusine residue.	MIG13	deoxyhypusine synthase
Q14008	CKAP5	78	-0.74	-1.43	0.4	-0.09	-0.24	0.22	Binds to the plus end of microtubules and regulates microtubule dynamics and microtubule organization. Acts as processive microtubule polymerase. Promotes cytoplasmic microtubule nucleation and elongation. Plays a major role in organizing spindle poles. In spindle formation protects kinetochore microtubules from depolymerization by KIF2C and has an essential role in centrosomal microtubule assemb…	ch-TOG;KIAA0097;TOG;TOGp	cytoskeleton associated protein 5
Q6PJT7	ZC3H14	13	-0.74	-0.34	-1.13	0.49	0.93	-0.01	NA	NA	NA
Q8IVD9	NUDCD3	7	-0.74	-1.36	-0.37	-0.09	-0.15	-0.17	NA	KIAA1068;NudCL	NudC domain containing 3
Q96MU7	YTHDC1	9	-0.74	0.12	-1.61	-1.05	-1.28	-0.57	Regulator of alternative splicing that specifically recognizes and binds N6-methyladenosine (m6A)-containing RNAs (PubMed:26318451, PubMed:26876937, PubMed:25242552). M6A is a modification present at internal sites of mRNAs and some non- coding RNAs and plays a role in the efficiency of mRNA splicing, processing and stability (PubMed:26318451, PubMed:25242552). Acts as a key regulator of exon-inc…	YT521;KIAA1966;YT521-B	YTH domain containing 1
Q9BTZ2	DHRS4	6	-0.74	-1.3	0	-2.3	-5.07	-0.75	NA	NA	NA
Q9H6U6	BCAS3	4	-0.74	-1.19	-0.3	0.78	1.56	0.24	NA	NA	NA
Q9H9F9	ACTR5	11	-0.74	0.64	-2.26	-0.15	0.06	-1.16	Proposed core component of the chromatin remodeling INO80 complex which is involved in transcriptional regulation, DNA replication and probably DNA repair. Involved in DNA double-strand break repair and UV-damage excision repair. {ECO:0000269|PubMed:19014934, ECO:0000269|PubMed:20855601}.	FLJ12785;Arp5;INO80M	ARP5 actin related protein 5 homolog
Q9UBX3	SLC25A10	5	-0.74	-0.86	-0.66	-1.11	-1.24	-1.1	Involved in translocation of malonate, malate and succinate in exchange for phosphate, sulfate, sulfite or thiosulfate across mitochondrial inner membrane.	DIC	solute carrier family 25 member 10
Q9ULD9	ZNF608	9	-0.74	-0.62	-0.85	0.73	1.09	0.11	Transcription factor, which represses ZNF609 transcription. {ECO:0000250|UniProtKB:Q56A10}.	KIAA1281;DKFZp434M098;NY-REN-36	zinc finger protein 608
O95707	POP4	4	-0.73	-1.07	-0.52	-0.33	-0.3	-0.51	Part of ribonuclease P, a protein complex that generates mature tRNA molecules by cleaving their 5'-ends. May function with RPP38 to coordinate the nucleolar targeting and/or assembly of RNase P.	RPP29	POP4 homolog, ribonuclease P/MRP subunit
P05107	ITGB2	6	-0.73	-0.58	-0.88	0.45	-0.04	1.36	Integrin ITGAL/ITGB2 is a receptor for ICAM1, ICAM2, ICAM3 and ICAM4. Integrins ITGAM/ITGB2 and ITGAX/ITGB2 are receptors for the iC3b fragment of the third complement component and for fibrinogen. Integrin ITGAX/ITGB2 recognizes the sequence G-P-R in fibrinogen alpha-chain. Integrin ITGAM/ITGB2 recognizes P1 and P2 peptides of fibrinogen gamma chain. Integrin ITGAM/ITGB2 is also a receptor for f…	LFA-1;MAC-1;CD18;MFI7	integrin subunit beta 2
P07954	FH	38	-0.73	-0.67	-0.77	-0.36	-0.14	-0.77	Also acts as a tumor suppressor.	NA	fumarate hydratase
P42704	LRPPRC	106	-0.73	-0.6	-0.83	-0.23	-0.31	-0.09	May play a role in RNA metabolism in both nuclei and mitochondria. In the nucleus binds to HNRPA1-associated poly(A) mRNAs and is part of nmRNP complexes at late stages of mRNA maturation which are possibly associated with nuclear mRNA export. May bind mature mRNA in the nucleus outer membrane. In mitochondria binds to poly(A) mRNA. Plays a role in translation or stability of mitochondrially enco…	GP130;LRP130;LSFC	leucine rich pentatricopeptide repeat containing
Q12980	NPRL3	5	-0.73	-0.69	-0.94	-0.11	-1.21	1.95	As a component of the GATOR1 complex functions as an inhibitor of the amino acid-sensing branch of the TORC1 pathway. The GATOR1 complex strongly increases GTP hydrolysis by RRAGA and RRAGB within RRAGC-containing heterodimers, thereby deactivating RRAGs, releasing mTORC1 from lysosomal surface and inhibiting mTORC1 signaling. The GATOR1 complex is negatively regulated by GATOR2 the other GATOR s…	CGTHBA;RMD11;NPR3;MARE;HS-40;C16orf35	NPR3 like, GATOR1 complex subunit
Q14157	UBAP2L	35	-0.73	-0.4	-1.04	-0.08	-0.19	-0.04	NA	NA	NA
Q5VIR6	VPS53	8	-0.73	-0.69	-0.78	0.83	0.71	1.27	Acts as component of the GARP complex that is involved in retrograde transport from early and late endosomes to the trans-Golgi network (TGN). The GARP complex is required for the maintenance of the cycling of mannose 6-phosphate receptors between the TGN and endosomes, this cycling is necessary for proper lysosomal sorting of acid hydrolases such as CTSD (PubMed:15878329, PubMed:18367545). Acts …	FLJ10979;HCCS1	VPS53, GARP complex subunit
Q86Y91	KIF18B	4	-0.73	-0.12	-2.37	-0.09	0.06	-0.61	In complex with KIF2C, constitutes the major microtubule plus-end depolymerizing activity in mitotic cells. Its major role may be to transport KIF2C and/or MAPRE1 along microtubules. {ECO:0000269|PubMed:20600703, ECO:0000269|PubMed:21820309}.	NA	kinesin family member 18B
Q96H20	SNF8	3	-0.73	-2	-0.04	-0.94	-0.35	-17.45	Component of the endosomal sorting complex required for transport II (ESCRT-II), which is required for multivesicular body (MVB) formation and sorting of endosomal cargo proteins into MVBs. The MVB pathway mediates delivery of transmembrane proteins into the lumen of the lysosome for degradation. The ESCRT-II complex is probably involved in the recruitment of the ESCRT-III complex. The ESCRT-II c…	EAP30;VPS22;Dot3	SNF8, ESCRT-II complex subunit
Q9Y4R8	TELO2	11	-0.73	0.38	-1.76	-0.34	-1.05	0.4	Regulator of the DNA damage response (DDR). Part of the TTT complex that is required to stabilize protein levels of the phosphatidylinositol 3-kinase-related protein kinase (PIKK) family proteins. The TTT complex is involved in the cellular resistance to DNA damage stresses, like ionizing radiation (IR), ultraviolet (UV) and mitomycin C (MMC). Together with the TTT complex and HSP90 may participa…	KIAA0683;hCLK2;TEL2	telomere maintenance 2
O75506	HSBP1	3	-0.72	-0.87	0.49	-0.06	-1.79	0.84	Negative regulator of the heat shock response. Negatively affects HSF1 DNA-binding activity. May have a role in the suppression of the activation of the stress response during the aging process.	NA	heat shock factor binding protein 1
P00441	SOD1	9	-0.72	-0.68	-0.75	-0.36	-0.13	-0.53	NA	NA	NA
P13667	PDIA4	54	-0.72	-0.64	-0.84	-0.39	0.26	-1.04	NA	ERP70;ERP72	protein disulfide isomerase family A member 4
P19474	TRIM21	3	-0.72	-1.02	-0.23	0.94	1.2	0.78	E3 ubiquitin-protein ligase whose activity is dependent on E2 enzymes, UBE2D1, UBE2D2, UBE2E1 and UBE2E2. Forms a ubiquitin ligase complex in cooperation with the E2 UBE2D2 that is used not only for the ubiquitination of USP4 and IKBKB but also for its self-ubiquitination. Component of cullin-RING-based SCF (SKP1-CUL1-F-box protein) E3 ubiquitin-protein ligase complexes such as SCF(SKP2)-like com…	RNF81;RO52;SSA1	tripartite motif containing 21
P49356	FNTB	4	-0.72	-0.54	-0.86	-0.44	-0.81	0.12	Essential subunit of the farnesyltransferase complex. Catalyzes the transfer of a farnesyl moiety from farnesyl diphosphate to a cysteine at the fourth position from the C- terminus of several proteins having the C-terminal sequence Cys- aliphatic-aliphatic-X. {ECO:0000269|PubMed:12036349, ECO:0000269|PubMed:12825937, ECO:0000269|PubMed:16893176, ECO:0000269|PubMed:19246009, ECO:0000269|PubMed:84…	FPTB	farnesyltransferase, CAAX box, beta
Q14CX7	NAA25	13	-0.72	-0.58	-0.82	0.02	0.23	-0.79	Non-catalytic subunit of the NatB complex which catalyzes acetylation of the N-terminal methionine residues of peptides beginning with Met-Asp-Glu. May play a role in normal cell-cycle progression. {ECO:0000269|PubMed:18570629}.	FLJ13089;C12orf30	N(alpha)-acetyltransferase 25, NatB auxiliary subunit
Q5JPH6	EARS2	6	-0.72	-0.82	-0.61	-0.25	-0.07	-0.49	Catalyzes the attachment of glutamate to tRNA(Glu) in a two-step reaction: glutamate is first activated by ATP to form Glu-AMP and then transferred to the acceptor end of tRNA(Glu). {ECO:0000250}.	KIAA1970;MSE1	glutamyl-tRNA synthetase 2, mitochondrial
Q86UV5	USP48	11	-0.72	-0.55	-0.83	0.41	0.33	0.16	NA	NA	NA
Q96SK2	TMEM209	4	-0.72	-0.69	0.78	-0.51	-0.36	-1.2	NA	FLJ14803;NET31	transmembrane protein 209
Q9H9P8	L2HGDH	10	-0.72	-0.14	-1.67	-0.6	-0.02	-1.19	NA	FLJ12618;C14orf160	L-2-hydroxyglutarate dehydrogenase
Q9NUQ6	SPATS2L	6	-0.72	-1.02	-0.4	-0.41	0.33	-1.42	NA	NA	NA
Q9UBQ5	EIF3K	7	-0.72	-0.65	-0.88	-1.95	-0.97	-2.05	Component of the eukaryotic translation initiation factor 3 (eIF-3) complex, which is required for several steps in the initiation of protein synthesis (PubMed:17581632, PubMed:25849773, PubMed:27462815). The eIF-3 complex associates with the 40S ribosome and facilitates the recruitment of eIF-1, eIF-1A, eIF-2:GTP:methionyl-tRNAi and eIF-5 to form the 43S pre- initiation complex (43S PIC). The eI…	eIF3k;PRO1474;HSPC029;PTD001;PLAC-24;M9;ARG134;EIF3S12	eukaryotic translation initiation factor 3 subunit K
Q9ULU4	ZMYND8	9	-0.72	-0.5	-0.93	-0.1	-0.75	1.01	NA	NA	NA
O76021	RSL1D1	35	-0.71	-0.8	-0.65	-0.21	-0.37	-0.09	NA	NA	NA
P38432	COIL	4	-0.71	-0.19	-1.31	0.28	0	0.42	Component of nuclear coiled bodies, also known as Cajal bodies or CBs, which are involved in the modification and assembly of nucleoplasmic snRNPs. {ECO:0000269|PubMed:7679389}.	CLN80;p80-coilin	coilin
P38646	HSPA9	67	-0.71	-0.61	-0.8	-0.55	-0.38	-0.84	NA	NA	NA
Q6ZMZ3	SYNE3	13	-0.71	-0.28	-1.3	1.84	1.52	2.28	As a component of the LINC (LInker of Nucleoskeleton and Cytoskeleton) complex involved in the connection between the nuclear lamina and the cytoskeleton. The nucleocytoplasmic interactions established by the LINC complex play an important role in the transmission of mechanical forces across the nuclear envelope and in nuclear movement and positioning. Probable anchoring protein which tethers the…	FLJ25605;NET53;Nesprin-3;Nesp3;C14orf49;LINC00341;C14orf139;NCRNA00341	spectrin repeat containing nuclear envelope family member 3
Q8TB61	SLC35B2	3	-0.71	-1.21	-0.4	-0.45	-0.26	-0.94	NA	NA	NA
Q9NRF9	POLE3	7	-0.71	0.07	-1.38	0.53	0.99	-0.1	Forms a complex with DNA polymerase epsilon subunit CHRAC1 and binds naked DNA, which is then incorporated into chromatin, aided by the nucleosome-remodeling activity of ISWI/SNF2H and ACF1.	CHRAC17;Ybl1;p17;CHARAC17;CHRAC2	DNA polymerase epsilon 3, accessory subunit
Q9NVS2	MRPS18A	3	-0.71	-1.55	-0.22	-1.13	-1.33	-0.75	NA	NA	NA
Q9UKU7	ACAD8	9	-0.71	-1.5	-0.11	-0.46	0.06	-1.18	Has very high activity toward isobutyryl-CoA. Is an isobutyryl-CoA dehydrogenase that functions in valine catabolism. Plays a role in transcriptional coactivation within the ARC complex. {ECO:0000269|PubMed:12359132}.	NA	acyl-CoA dehydrogenase family member 8
Q9UL26	RAB22A	7	-0.71	-0.32	-1.02	0.02	0.18	-0.45	Plays a role in endocytosis and intracellular protein transport. Mediates trafficking of TF from early endosomes to recycling endosomes (PubMed:16537905). Required for NGF-mediated endocytosis of NTRK1, and subsequent neurite outgrowth (PubMed:21849477). Binds GTP and GDP and has low GTPase activity. Alternates between a GTP-bound active form and a GDP-bound inactive form (PubMed:16537905). {ECO:…	NA	RAB22A, member RAS oncogene family
Q9ULW0	TPX2	19	-0.71	-0.53	-0.87	-0.27	-0.38	-0.34	Spindle assembly factor required for normal assembly of mitotic spindles. Required for normal assembly of microtubules during apoptosis. Required for chromatin and/or kinetochore dependent microtubule nucleation. Mediates AURKA localization to spindle microtubules (PubMed:18663142, PubMed:19208764). Activates AURKA by promoting its autophosphorylation at 'Thr-288' and protects this residue agains…	p100;DIL-2;C20orf2;C20orf1	TPX2, microtubule nucleation factor
Q9UPN9	TRIM33	10	-0.71	-0.78	-0.74	-1.06	-0.74	-1.94	Acts as an E3 ubiquitin-protein ligase. Promotes SMAD4 ubiquitination, nuclear exclusion and degradation via the ubiquitin proteasome pathway. According to PubMed:16751102, does not promote a decrease in the level of endogenous SMAD4. May act as a transcriptional repressor. Inhibits the transcriptional response to TGF-beta/BMP signaling cascade. Plays a role in the control of cell proliferation. …	TIF1GAMMA;FLJ11429;KIAA1113;TIFGAMMA;RFG7;TF1G;TIF1G;PTC7	tripartite motif containing 33
Q9UPT5	EXOC7	5	-0.71	-0.99	-0.43	-0.74	0.81	-2.31	NA	NA	NA
O15392	BIRC5	3	-0.7	-0.06	-1.42	-0.01	-0.05	-0.03	NA	NA	NA
O43583	DENR	7	-0.7	-0.11	-1.52	0.05	-0.59	1.47	May be involved in the translation of target mRNAs by scanning and recognition of the initiation codon. Involved in translation initiation; promotes recruitmnet of aminoacetyled initiator tRNA to P site of 40S ribosomes. Can promote release of deacylated tRNA and mRNA from recycled 40S subunits following ABCE1-mediated dissociation of post-termination ribosomal complexes into subunits. Plays a ro…	DRP;DRP1;SMAP-3	density regulated re-initiation and release factor
O75531	BANF1	17	-0.7	-0.83	-0.53	-0.41	-0.86	0.27	Plays fundamental roles in nuclear assembly, chromatin organization, gene expression and gonad development. May potently compress chromatin structure and be involved in membrane recruitment and chromatin decondensation during nuclear assembly. Contains 2 non-specific dsDNA-binding sites which may promote DNA cross-bridging. {ECO:0000269|PubMed:12163470}. (Microbial infection) In case of poxvirus …	BAF	barrier to autointegration factor 1
O95149	SNUPN	5	-0.7	-0.49	-0.89	0.03	0.02	0.06	Functions as an U snRNP-specific nuclear import adapter. Involved in the trimethylguanosine (m3G)-cap-dependent nuclear import of U snRNPs. Binds specifically to the terminal m3G-cap U snRNAs. {ECO:0000269|PubMed:10209022, ECO:0000269|PubMed:15920472, ECO:0000269|PubMed:16030253, ECO:0000269|PubMed:9670026}.	SNURPORTIN-1;Snurportin1;RNUT1	snurportin 1
P00403	MT-CO2	8	-0.7	-0.93	-0.56	-0.17	-0.26	-0.02	NA	NA	NA
Q9BU76	C1orf35	7	-0.7	0	-2.3	-1.11	-0.26	-1.47	NA	MGC4174;MMTAG2	chromosome 1 open reading frame 35
Q9BXY0	MAK16	4	-0.7	-0.42	-0.95	0.1	0.12	0.13	NA	MAK16L;RBM13	MAK16 homolog
Q9Y223	GNE	8	-0.7	-0.74	-0.66	0	0.33	-0.41	NA	NA	NA
Q9Y3D8	AK6	5	-0.7	0.38	-2.17	0.14	0.38	-0.58	Broad-specificity nucleoside monophosphate (NMP) kinase that catalyzes the reversible transfer of the terminal phosphate group between nucleoside triphosphates and monophosphates. AMP and dAMP are the preferred substrates, but CMP and dCMP are also good substrates. IMP is phosphorylated to a much lesser extent. All nucleoside triphosphates ATP, GTP, UTP, CTP, dATP, dCTP, dGTP, and TTP are accepte…	CINAP	adenylate kinase 6
P18074	ERCC2	3	-0.69	-1.01	-0.42	0.54	0.55	0.31	ATP-dependent 5'-3' DNA helicase, component of the general transcription and DNA repair factor IIH (TFIIH) core complex, which is involved in general and transcription-coupled nucleotide excision repair (NER) of damaged DNA and, when complexed to CAK, in RNA transcription by RNA polymerase II. In NER, TFIIH acts by opening DNA around the lesion to allow the excision of the damaged oligonucleotide…	MAG;EM9;MGC102762;MGC126218;MGC126219;TFIIH;XPD	ERCC excision repair 2, TFIIH core complex helicase subunit
P18433	PTPRA	3	-0.69	-2	-0.31	-0.41	1.26	-1.76	NA	LRP;HLPR;HPTPA;RPTPA;PTPRL2;PTPA	protein tyrosine phosphatase, receptor type A
P18583	SON	35	-0.69	-0.98	-0.36	0.01	-0.09	0.09	NA	NA	NA
P61586	RHOA	3	-0.69	0.43	-1.95	-1.14	-0.59	-1.18	Regulates a signal transduction pathway linking plasma membrane receptors to the assembly of focal adhesions and actin stress fibers. Involved in a microtubule-dependent signal that is required for the myosin contractile ring formation during cell cycle cytokinesis. Plays an essential role in cleavage furrow formation. Required for the apical junction formation of keratinocyte cell-cell adhesion.…	RhoA;Rho12;RHOH12;ARH12;ARHA	ras homolog family member A
Q13144	EIF2B5	11	-0.69	-0.03	-1.48	-0.39	-0.41	-0.34	Catalyzes the exchange of eukaryotic initiation factor 2-bound GDP for GTP.	EIF2Bepsilon;EIF-2B	eukaryotic translation initiation factor 2B subunit epsilon
Q14146	URB2	13	-0.69	-0.27	-1.1	-1.27	-1.04	-2.15	NA	NPA2;NET10;KIAA0133	URB2 ribosome biogenesis homolog
Q5JTJ3	COA6	6	-0.69	-1.96	-0.33	0.17	-0.79	1.32	Involved in the maturation of the mitochondrial respiratory chain complex IV subunit MT-CO2/COX2. Thereby, may regulate early steps of complex IV assembly. Mitochondrial respiratory chain complex IV or cytochrome c oxidase is the component of the respiratory chain that catalyzes the transfer of electrons from intermembrane space cytochrome c to molecular oxygen in the matrix and as a consequence …	C1orf31	cytochrome c oxidase assembly factor 6
Q63ZY3	KANK2	4	-0.69	-1.1	-0.41	0.95	0.95	-0.55	Involved in transcription regulation by sequestering nuclear receptor coactivators, such as NCOA1, NCOA2 and NCOA3, in the cytoplasm; the function is deregulated by phosphorylation. Involved in the negative control of vitamin D receptor signaling pathway (PubMed:24671081). May be involved in the control of cytoskeleton formation by regulating actin polymerization. Involved in regulation of caspas…	KIAA1518;MXRA3;ANKRD25	KN motif and ankyrin repeat domains 2
Q8IVM0	CCDC50	4	-0.69	-1.57	-0.23	0.09	0.33	-1.08	Involved in EGFR signaling. {ECO:0000269|PubMed:15314609}.	Ymer;C3orf6;DFNA44	coiled-coil domain containing 50
Q8TD16	BICD2	12	-0.69	0.05	-1.92	-0.32	0.08	-0.87	Acts as an adapter protein linking the dynein motor complex to various cargos and converts dynein from a non- processive to a highly processive motor in the presence of dynactin. Facilitates and stabilizes the interaction between dynein and dynactin and activates dynein processivity (the ability to move along a microtubule for a long distance without falling off the track) (By similarity). Facili…	KIAA0699	BICD cargo adaptor 2
Q8WV28	BLNK	9	-0.69	0.83	-2.22	-0.95	-0.43	-1.98	Functions as a central linker protein, downstream of the B-cell receptor (BCR), bridging the SYK kinase to a multitude of signaling pathways and regulating biological outcomes of B-cell function and development. Plays a role in the activation of ERK/EPHB2, MAP kinase p38 and JNK. Modulates AP1 activation. Important for the activation of NF-kappa-B and NFAT. Plays an important role in BCR-mediated…	SLP65;Ly57;SLP-65;BLNK-s;BASH;bca	B cell linker
Q9Y2X9	ZNF281	4	-0.69	4.18	-2.62	0.25	-0.23	1.01	Transcription repressor that plays a role in regulation of embryonic stem cells (ESCs) differentiation. Required for ESCs differentiation and acts by mediating autorepression of NANOG in ESCs: binds to the NANOG promoter and promotes association of NANOG protein to its own promoter and recruits the NuRD complex, which deacetylates histones. Not required for establishement and maintenance of ESCs …	ZBP-99	zinc finger protein 281
Q9Y6A4	CFAP20	4	-0.69	0.12	-18.12	-17.77	-15.3	-16.89	Cilium- and flagellum-specific protein that plays a role in axonemal structure organization and motility. Involved in the regulation of the size and morphology of cilia (PubMed:24414207). Required for axonemal microtubules polyglutamylation (PubMed:24414207). {ECO:0000269|PubMed:24414207}.	GTL3;fSAP23;C16orf80	cilia and flagella associated protein 20
O14949	UQCRQ	5	-0.68	-0.63	-0.67	-1.79	-2.24	-1.09	This is a component of the ubiquinol-cytochrome c reductase complex (complex III or cytochrome b-c1 complex), which is part of the mitochondrial respiratory chain. This subunit, together with cytochrome b, binds to ubiquinone.	QP-C;QCR8;UQCR7	ubiquinol-cytochrome c reductase complex III subunit VII
O75534	CSDE1	39	-0.68	-0.68	-0.65	0.04	0.18	-0.35	NA	NA	NA
P18124	RPL7	22	-0.68	-0.68	-0.62	-0.05	-0.05	0	Component of the large ribosomal subunit (PubMed:12962325). Binds to G-rich structures in 28S rRNA and in mRNAs. Plays a regulatory role in the translation apparatus; inhibits cell-free translation of mRNAs. {ECO:0000305|PubMed:12962325}.	humL7-1;L7	ribosomal protein L7
P18621	RPL17	20	-0.68	-1.23	0.12	0.38	0.17	0.04	Component of the large ribosomal subunit. {ECO:0000305|PubMed:12962325}.	rpL23;L17	ribosomal protein L17
P24534	EEF1B2	9	-0.68	-0.4	-0.95	0.28	0.11	0.54	EF-1-beta and EF-1-delta stimulate the exchange of GDP bound to EF-1-alpha to GTP.	NA	eukaryotic translation elongation factor 1 beta 2
P50552	VASP	16	-0.68	0.1	-1.6	0.35	0.1	0.65	Ena/VASP proteins are actin-associated proteins involved in a range of processes dependent on cytoskeleton remodeling and cell polarity such as axon guidance, lamellipodial and filopodial dynamics, platelet activation and cell migration. VASP promotes actin filament elongation. It protects the barbed end of growing actin filaments against capping and increases the rate of actin polymerization in …	NA	vasodilator stimulated phosphoprotein
P51553	IDH3G	10	-0.68	-0.62	-0.73	-0.16	0.06	-0.73	Regulatory subunit which plays a role in the allosteric regulation of the enzyme catalyzing the decarboxylation of isocitrate (ICT) into alpha-ketoglutarate. The heterodimer composed of the alpha (IDH3A) and beta (IDH3B) subunits and the heterodimer composed of the alpha (IDH3A) and gamma (IDH3G) subunits, have considerable basal activity but the full activity of the heterotetramer (containing tw…	NA	isocitrate dehydrogenase 3 (NAD(+)) gamma
P57723	PCBP4	4	-0.68	-0.23	-1.27	2.08	3.29	0.9	Single-stranded nucleic acid binding protein that binds preferentially to oligo dC. {ECO:0000250}.	MCG10;LIP4	poly(rC) binding protein 4
Q7Z7L1	SLFN11	13	-0.68	-1.22	0.21	-0.22	-0.31	-0.15	Interferon (IFN)-induced antiviral protein which acts as an inhibitor of retrovirus protein synthesis. Specifically abrogates the production of retroviruses such as human immunodeficiency virus 1 (HIV-1) by acting as a specific inhibitor of the synthesis of retroviruses encoded proteins in a codon- usage-dependent manner. Binds to tRNAs and exploits the unique viral codon bias towards A/T nucleot…	FLJ34922	schlafen family member 11
Q9GZS3	WDR61	12	-0.68	-0.22	-1.09	-1.76	-2.31	-0.96	Component of the PAF1 complex (PAF1C) which has multiple functions during transcription by RNA polymerase II and is implicated in regulation of development and maintenance of embryonic stem cell pluripotency. PAF1C associates with RNA polymerase II through interaction with POLR2A CTD non- phosphorylated and 'Ser-2'- and 'Ser-5'-phosphorylated forms and is involved in transcriptional elongation, a…	REC14	WD repeat domain 61
Q9H993	ARMT1	13	-0.68	-0.22	-1.12	-1.09	-0.85	-1.17	O-methyltransferase that methylates glutamate residues of target proteins to form gamma-glutamyl methyl ester residues. Methylates PCNA, suggesting it is involved in the DNA damage response. {ECO:0000269|PubMed:25732820}.	FLJ12910;C6orf211	acidic residue methyltransferase 1
O15320	NA	6	-0.67	-0.24	-1.03	2.23	1.87	2.61	NA	NA	NA
O95619	YEATS4	6	-0.67	-3.29	0.79	-0.95	-0.56	-1.48	Component of the NuA4 histone acetyltransferase (HAT) complex which is involved in transcriptional activation of select genes principally by acetylation of nucleosomal histones H4 and H2A. This modification may both alter nucleosome - DNA interactions and promote interaction of the modified histones with other proteins which positively regulate transcription. This complex may be required for the …	NuBI-1;GAS41;YAF9	YEATS domain containing 4
P06746	POLB	5	-0.67	-0.19	-1.08	0.69	0.63	0.55	Repair polymerase that plays a key role in base-excision repair. Has 5'-deoxyribose-5-phosphate lyase (dRP lyase) activity that removes the 5' sugar phosphate and also acts as a DNA polymerase that adds one nucleotide to the 3' end of the arising single-nucleotide gap. Conducts 'gap-filling' DNA synthesis in a stepwise distributive fashion rather than in a processive fashion as for other DNA poly…	NA	DNA polymerase beta
P14859	POU2F1	3	-0.67	-0.27	-1.04	-0.49	-0.64	-0.59	NA	NA	NA
Q13823	GNL2	21	-0.67	-0.6	-0.75	-0.13	-0.12	-0.32	GTPase that associates with pre-60S ribosomal subunits in the nucleolus and is required for their nuclear export and maturation (By similarity). May promote cell proliferation possibly by increasing p53/TP53 protein levels, and consequently those of its downstream product CDKN1A/p21, and decreasing RPL23A protein levels (PubMed:26203195). {ECO:0000250, ECO:0000269|PubMed:26203195}.	Ngp-1;HUMAUANTIG;Nog2;Nug2	G protein nucleolar 2
Q15287	RNPS1	12	-0.67	-0.95	-0.39	-0.11	-0.12	-0.1	NA	NA	NA
Q15555	MAPRE2	15	-0.67	-0.82	-0.52	-0.14	-0.14	-0.1	NA	NA	NA
Q8WUA7	TBC1D22A	7	-0.67	-0.28	-1.06	0.34	0	0.75	NA	NA	NA
Q9BZJ0	CRNKL1	16	-0.67	-0.33	-1.03	-0.64	-0.62	-0.71	NA	NA	NA
Q9Y4I1	MYO5A	7	-0.67	-0.23	-1.2	-0.75	-0.08	-1.75	Processive actin-based motor that can move in large steps approximating the 36-nm pseudo-repeat of the actin filament. Involved in melanosome transport. Also mediates the transport of vesicles to the plasma membrane. May also be required for some polarization process involved in dendrite formation. {ECO:0000269|PubMed:10448864}.	MYO5;GS1;MYR12;MYH12	myosin VA
O75312	ZPR1	16	-0.66	-0.01	-1.43	0.32	0.63	-0.83	Acts as a signaling molecule that communicates proliferative growth signals from the cytoplasm to the nucleus. Plays a role for the localization and accumulation of the survival motor neuron protein SMN1 in sub-nuclear bodies, including gems and Cajal bodies. Induces neuron differentiation and stimulates axonal growth and formation of growth cone in spinal cord motor neurons. Plays a role in the …	ZNF259	ZPR1 zinc finger
O95394	PGM3	7	-0.66	-0.16	-1.32	-1.17	-1.31	-0.84	NA	NA	NA
P09914	IFIT1	4	-0.66	2.42	-3	-1.26	-2.22	-0.33	Interferon-induced antiviral RNA-binding protein that specifically binds single-stranded RNA bearing a 5'-triphosphate group (PPP-RNA), thereby acting as a sensor of viral single- stranded RNAs and inhibiting expression of viral messenger RNAs. Single-stranded PPP-RNAs, which lack 2'-O-methylation of the 5' cap and bear a 5'-triphosphate group instead, are specific from viruses, providing a molec…	GARG-16;G10P1;IFI56;IFNAI1	interferon induced protein with tetratricopeptide repeats 1
Q68E01	INTS3	9	-0.66	-0.77	-0.48	-0.25	-0.37	-0.14	NA	NA	NA
Q6NVY1	HIBCH	13	-0.66	-0.51	-0.76	-0.23	0.26	-1.15	Hydrolyzes 3-hydroxyisobutyryl-CoA (HIBYL-CoA), a saline catabolite. Has high activity toward isobutyryl-CoA. Could be an isobutyryl-CoA dehydrogenase that functions in valine catabolism. Also hydrolyzes 3-hydroxypropanoyl-CoA. {ECO:0000269|PubMed:8824301}.	NA	3-hydroxyisobutyryl-CoA hydrolase
Q99661	KIF2C	12	-0.66	-0.19	-1.24	-0.04	0.6	-1.35	In complex with KIF18B, constitutes the major microtubule plus-end depolymerizing activity in mitotic cells (PubMed:21820309). Regulates the turnover of microtubules at the kinetochore and functions in chromosome segregation during mitosis (PubMed:19060894). Plays a role in chromosome congression and is required for the lateral to end-on conversion of the chromosome- microtubule attachment (PubMe…	MCAK;CT139;KNSL6	kinesin family member 2C
Q9NRG0	CHRAC1	4	-0.66	-0.3	-1.01	-1.31	-0.98	-3.38	Forms a complex with DNA polymerase epsilon subunit POLE3 and binds naked DNA, which is then incorporated into chromatin, aided by the nucleosome remodeling activity of ISWI/SNF2H and ACF1.	CHRAC15;YCL1	chromatin accessibility complex subunit 1
O00418	EEF2K	7	-0.65	-0.45	-0.83	-0.11	0.58	-0.45	Threonine kinase that regulates protein synthesis by controlling the rate of peptide chain elongation. Upon activation by a variety of upstream kinases including AMPK or TRPM7, phosphorylates the elongation factor EEF2 at a single site, renders it unable to bind ribosomes and thus inactive. In turn, the rate of protein synthesis is reduced. {ECO:0000269|PubMed:14709557, ECO:0000269|PubMed:9144159…	eEF-2K;CaMKIII	eukaryotic elongation factor 2 kinase
O95260	ATE1	7	-0.65	-1.29	0.18	-2.27	-2.76	-1.45	Involved in the post-translational conjugation of arginine to the N-terminal aspartate or glutamate of a protein. This arginylation is required for degradation of the protein via the ubiquitin pathway. Does not arginylate cysteine residues (By similarity). {ECO:0000250}.	NA	arginyltransferase 1
O95373	IPO7	40	-0.65	-0.48	-0.78	0.01	0.11	-0.37	Functions in nuclear protein import, either by acting as autonomous nuclear transport receptor or as an adapter-like protein in association with the importin-beta subunit KPNB1. Acting autonomously, is thought to serve itself as receptor for nuclear localization signals (NLS) and to promote translocation of import substrates through the nuclear pore complex (NPC) by an energy requiring, Ran-depen…	Imp7;RANBP7	importin 7
O95793	STAU1	22	-0.65	-0.61	-0.74	0.27	0.29	0.25	NA	NA	NA
P52298	NCBP2	9	-0.65	-1.42	0.08	-0.34	-0.13	-0.96	Component of the cap-binding complex (CBC), which binds co-transcriptionally to the 5' cap of pre-mRNAs and is involved in various processes such as pre-mRNA splicing, translation regulation, nonsense-mediated mRNA decay, RNA-mediated gene silencing (RNAi) by microRNAs (miRNAs) and mRNA export. The CBC complex is involved in mRNA export from the nucleus via its interaction with ALYREF/THOC4/ALY, …	NIP1;CBP20;Cbc2	nuclear cap binding protein subunit 2
P98175	RBM10	23	-0.65	-0.97	-0.31	-0.01	0.14	-0.27	May be involved in post-transcriptional processing, most probably in mRNA splicing. Binds to RNA homopolymers, with a preference for poly(G) and poly(U) and little for poly(A) (By similarity). May bind to specific miRNA hairpins (PubMed:28431233). {ECO:0000250|UniProtKB:P70501, ECO:0000269|PubMed:18315527, ECO:0000269|PubMed:28431233}.	DXS8237E;KIAA0122;GPATC9;ZRANB5;GPATCH9;S1-1	RNA binding motif protein 10
Q16629	SRSF7	15	-0.65	-0.62	-0.66	-0.31	-0.41	-0.26	Required for pre-mRNA splicing. Can also modulate alternative splicing in vitro. Represses the splicing of MAPT/Tau exon 10. May function as export adapter involved in mRNA nuclear export such as of histone H2A. Binds mRNA which is thought to be transferred to the NXF1-NXT1 heterodimer for export (TAP/NXF1 pathway); enhances NXF1-NXT1 RNA-binding activity. RNA-binding is semi-sequence specific. {…	9G8;ZCRB2;HSSG1;AAG3;RBM37;ZCCHC20;SFRS7	serine and arginine rich splicing factor 7
Q6PD62	CTR9	16	-0.65	-0.57	-0.72	-0.62	-0.35	-1.03	Component of the PAF1 complex (PAF1C) which has multiple functions during transcription by RNA polymerase II and is implicated in regulation of development and maintenance of embryonic stem cell pluripotency. PAF1C associates with RNA polymerase II through interaction with POLR2A CTD non- phosphorylated and 'Ser-2'- and 'Ser-5'-phosphorylated forms and is involved in transcriptional elongation, a…	KIAA0155;TSBP;p150TSP;SH2BP1	CTR9 homolog, Paf1/RNA polymerase II complex component
Q70J99	UNC13D	7	-0.65	-0.63	-0.55	-0.64	-0.83	-0.23	Plays a role in cytotoxic granule exocytosis in lymphocytes. Required for both granule maturation and granule docking and priming at the immunologic synapse. Regulates assembly of recycling and late endosomal structures, leading to the formation of an endosomal exocytic compartment that fuses with perforin-containing granules at the immunologic synapse and licences them for exocytosis. Regulates …	Munc13-4	unc-13 homolog D
Q7Z5K2	WAPL	17	-0.65	0.34	-1.4	0.56	2.2	-0.09	Regulator of sister chromatid cohesion in mitosis which negatively regulates cohesin association with chromatin. Involved in both sister chromatid cohesion during interphase and sister- chromatid resolution during early stages of mitosis. Couples DNA replication to sister chromatid cohesion. Cohesion ensures that chromosome partitioning is accurate in both meiotic and mitotic cells and plays an i…	FOE;KIAA0261;WAPAL	WAPL cohesin release factor
Q8TCU6	PREX1	6	-0.65	0.15	-1.12	-0.79	-0.15	-1.37	NA	NA	NA
Q9H254	SPTBN4	5	-0.65	-1.05	-0.01	0.31	-0.43	1.87	NA	SPTBN3;KIAA1642	spectrin beta, non-erythrocytic 4
Q9ULJ6	ZMIZ1	4	-0.65	-0.88	-0.43	-0.15	0.02	-0.75	Acts as transcriptional coactivator. Increases ligand- dependent transcriptional activity of AR and promotes AR sumoylation. The stimulation of AR activity is dependent upon sumoylation (PubMed:14609956, PubMed:26522984). Involved in transcriptional activation of a subset of NOTCH1 target genes including MYC. Involved in thymocyte and T cell development (By similarity). {ECO:0000250|UniProtKB:Q6P…	RP11-519K18.1;KIAA1224;FLJ13541;hZIMP10;Zimp10;MIZ;RAI17	zinc finger MIZ-type containing 1
Q9Y3C6	PPIL1	7	-0.65	-0.34	-0.97	0.13	0.25	-0.73	PPIases accelerate the folding of proteins. It catalyzes the cis-trans isomerization of proline imidic peptide bonds in oligopeptides. May be involved in pre-mRNA splicing. {ECO:0000269|PubMed:16595688}.	CYPL1	peptidylprolyl isomerase like 1
Q9Y6A5	TACC3	20	-0.65	-0.75	-0.56	-0.11	0.06	-0.29	Plays a role in the microtubule-dependent coupling of the nucleus and the centrosome. Involved in the processes that regulate centrosome-mediated interkinetic nuclear migration (INM) of neural progenitors (By similarity). Acts as component of the TACC3/ch-TOG/clathrin complex proposed to contribute to stabilization of kinetochore fibers of the mitotic spindle by acting as inter-microtubule bridge…	ERIC1	transforming acidic coiled-coil containing protein 3
O00488	ZNF593	4	-0.64	-0.43	-0.83	-0.16	-0.16	-0.32	Negatively modulates the DNA binding activity of Oct-2 and therefore its transcriptional regulatory activity. Could act either by binding to DNA octamer or by interacting with Oct-2. May also be a modulator of other octamer-binding proteins.	ZT86	zinc finger protein 593
Q15427	SF3B4	4	-0.64	-0.32	-0.93	0.83	0.46	1.42	Involved in pre-mRNA splicing as a component of the splicing factor SF3B complex (PubMed:27720643). SF3B complex is required for 'A' complex assembly formed by the stable binding of U2 snRNP to the branchpoint sequence (BPS) in pre-mRNA. Sequence independent binding of SF3A/SF3B complex upstream of the branch site is essential, it may anchor U2 snRNP to the pre-mRNA (PubMed:12234937). May also be…	SAP49;SF3b49;Hsh49	splicing factor 3b subunit 4
Q3L8U1	CHD9	7	-0.64	-0.04	-1.17	0.04	-0.01	0.42	Acts as a transcriptional coactivator for PPARA and possibly other nuclear receptors. Proposed to be a ATP-dependent chromatin remodeling protein. Has DNA-dependent ATPase activity and binds to A/T-rich DNA. Associates with A/T-rich regulatory regions in promoters of genes that participate in the differentiation of progenitors during osteogenesis (By similarity). {ECO:0000250, ECO:0000269|PubMed:…	FLJ12178;KIAA0308;BC022889	chromodomain helicase DNA binding protein 9
Q7L8L6	FASTKD5	4	-0.64	-1.35	-0.52	-1.65	-1.98	-1.26	Plays an important role in the processing of non- canonical mitochondrial mRNA precursors (PubMed:25683715). {ECO:0000269|PubMed:25683715}.	FLJ13149	FAST kinase domains 5
Q9BTX1	NDC1	4	-0.64	-1.25	-0.08	0	0.21	-0.7	NA	NA	NA
Q9BZK7	TBL1XR1	9	-0.64	-1.84	1.26	0.86	1.35	1.02	F-box-like protein involved in the recruitment of the ubiquitin/19S proteasome complex to nuclear receptor-regulated transcription units. Plays an essential role in transcription activation mediated by nuclear receptors. Probably acts as integral component of the N-Cor corepressor complex that mediates the recruitment of the 19S proteasome complex, leading to the subsequent proteasomal degradatio…	IRA1;FLJ12894;TBLR1;C21;DC42	transducin beta like 1 X-linked receptor 1
Q9C0E2	XPO4	19	-0.64	-0.85	-0.48	-0.18	-0.28	0.03	Mediates the nuclear export of proteins (cargos) with broad substrate specificity. In the nucleus binds cooperatively to its cargo and to the GTPase Ran in its active GTP-bound form. Docking of this trimeric complex to the nuclear pore complex (NPC) is mediated through binding to nucleoporins. Upon transit of a nuclear export complex into the cytoplasm, disassembling of the complex and hydrolysis…	FLJ13046;KIAA1721	exportin 4
Q9NX74	DUS2	6	-0.64	-2.36	1.26	-0.64	-0.53	-0.83	Dihydrouridine synthase. Catalyzes the synthesis of dihydrouridine, a modified base found in the D-loop of most tRNAs. Negatively regulates the activation of EIF2AK2/PKR. {ECO:0000269|PubMed:15994936, ECO:0000269|PubMed:18096616}.	FLJ20399;SMM1;DUS2L	dihydrouridine synthase 2
Q9ULW3	ABT1	7	-0.64	-0.41	-0.86	0.07	-0.83	1.32	Could be a novel TATA-binding protein (TBP) which can function as a basal transcription activator. Can act as a regulator of basal transcription for class II genes (By similarity). {ECO:0000250}.	Esf2	activator of basal transcription 1
O15020	SPTBN2	16	-0.63	-0.45	-0.72	1.09	0.33	2.08	Probably plays an important role in neuronal membrane skeleton.	SCA5	spectrin beta, non-erythrocytic 2
O75521	ECI2	12	-0.63	-2.81	1.88	-0.24	0.09	-0.43	NA	NA	NA
O95602	POLR1A	22	-0.63	-0.63	-0.66	0.47	0.38	0.65	DNA-dependent RNA polymerase catalyzes the transcription of DNA into RNA using the four ribonucleoside triphosphates as substrates. Largest and catalytic core component of RNA polymerase I which synthesizes ribosomal RNA precursors. Forms the polymerase active center together with the second largest subunit. A single stranded DNA template strand of the promoter is positioned within the central ac…	DKFZP586M0122;FLJ21915;RPO1-4;RPA1	RNA polymerase I subunit A
P00367	GLUD1	28	-0.63	-0.51	-0.71	-0.28	-0.04	-0.62	Mitochondrial glutamate dehydrogenase that converts L- glutamate into alpha-ketoglutarate. Plays a key role in glutamine anaplerosis by producing alpha-ketoglutarate, an important intermediate in the tricarboxylic acid cycle. May be involved in learning and memory reactions by increasing the turnover of the excitatory neurotransmitter glutamate (By similarity). {ECO:0000250}.	GDH;GLUD	glutamate dehydrogenase 1
P40926	MDH2	39	-0.63	-0.94	-0.39	-0.2	-0.11	-0.25	NA	NA	malate dehydrogenase 2
P47755	CAPZA2	8	-0.63	-0.39	-0.86	0.69	0.22	1.43	F-actin-capping proteins bind in a Ca(2+)-independent manner to the fast growing ends of actin filaments (barbed end) thereby blocking the exchange of subunits at these ends. Unlike other capping proteins (such as gelsolin and severin), these proteins do not sever actin filaments.	CAPZ;CAPPA2	capping actin protein of muscle Z-line subunit alpha 2
Q02818	NUCB1	16	-0.63	-0.32	-0.95	-0.46	-1.06	0.5	Major calcium-binding protein of the Golgi. May have a role in calcium homeostasis (By similarity). {ECO:0000250}.	NUC;Calnuc	nucleobindin 1
Q13685	AAMP	5	-0.63	0.29	-1.26	-0.83	-0.27	-1.56	Plays a role in angiogenesis and cell migration. In smooth muscle cell migration, may act through the RhoA pathway. {ECO:0000269|PubMed:10329261, ECO:0000269|PubMed:18634987}.	NA	angio associated migratory cell protein
Q14289	PTK2B	17	-0.63	-0.91	-0.33	0.71	0.94	-0.22	Non-receptor protein-tyrosine kinase that regulates reorganization of the actin cytoskeleton, cell polarization, cell migration, adhesion, spreading and bone remodeling. Plays a role in the regulation of the humoral immune response, and is required for normal levels of marginal B-cells in the spleen and normal migration of splenic B-cells. Required for normal macrophage polarization and migration…	CAKB;PYK2;RAFTK;PTK;CADTK;FAK2	protein tyrosine kinase 2 beta
Q6DKJ4	NXN	8	-0.63	-0.75	-0.37	-0.32	-0.05	-0.77	Functions as a redox-dependent negative regulator of the Wnt signaling pathway, possibly by preventing ubiquitination of DVL3 by the BCR(KLHL12) complex. May also function as a transcriptional regulator act as a regulator of protein phosphatase 2A (PP2A) (By similarity). {ECO:0000250}.	FLJ12614;NRX	nucleoredoxin
Q92576	PHF3	12	-0.63	-0.63	-0.51	-0.47	1.14	-3.17	NA	NA	PHD finger protein 3
Q96EY1	DNAJA3	8	-0.63	-0.25	-0.96	-0.6	-0.1	-0.96	NA	NA	NA
Q9BW92	TARS2	18	-0.63	-1.54	0.04	-1.03	-0.7	-1.22	Catalyzes the attachment of threonine to tRNA(Thr) in a two-step reaction: threonine is first activated by ATP to form Thr-AMP and then transferred to the acceptor end of tRNA(Thr). Also edits incorrectly charged tRNA(Thr) via its editing domain. {ECO:0000269|PubMed:26811336}.	FLJ12528;TARSL1	threonyl-tRNA synthetase 2, mitochondrial
Q9NWK9	ZNHIT6	6	-0.63	-1.75	0.14	-0.79	0.14	-1.46	Required for box C/D snoRNAs accumulation involved in snoRNA processing, snoRNA transport to the nucleolus and ribosome biogenesis. {ECO:0000269|PubMed:17636026}.	FLJ20729;NY-BR-75;BCD1;C1orf181	zinc finger HIT-type containing 6
Q9UNF1	MAGED2	6	-0.63	-1.36	-0.23	-0.92	0.5	-3.15	Regulates the expression, localization to the plasma membrane and function of the sodium chloride cotransporters SLC12A1 and SLC12A3, two key components of salt reabsorption in the distal renal tubule. {ECO:0000269|PubMed:27120771}.	JCL-1;BCG1;11B6;MAGE-D2;HCA10;MAGED;MGC8386	MAGE family member D2
P00338	LDHA	66	-0.62	-1.27	-0.06	-0.03	-0.01	-0.13	NA	NA	NA
P13761	NA	3	-0.62	-0.4	-0.83	-1.63	-6.49	0.01	NA	NA	NA
P16104	H2AX	5	-0.62	-0.93	-0.36	3.58	3.15	4.24	Variant histone H2A which replaces conventional H2A in a subset of nucleosomes. Nucleosomes wrap and compact DNA into chromatin, limiting DNA accessibility to the cellular machineries which require DNA as a template. Histones thereby play a central role in transcription regulation, DNA repair, DNA replication and chromosomal stability. DNA accessibility is regulated via a complex set of post-tran…	H2AX	H2A histone family member X
P26440	IVD	15	-0.62	-1.02	-0.23	0.85	1.19	0.64	NA	ACAD2	isovaleryl-CoA dehydrogenase
P29374	ARID4A	3	-0.62	0.75	-1.38	1.2	0	2.18	Interacts with the viral protein-binding domain of the retinoblastoma protein.	RBP1;RBP-1;RBBP1	AT-rich interaction domain 4A
P57772	EEFSEC	9	-0.62	-0.05	-1.4	-0.13	-0.23	-0.01	Translation factor necessary for the incorporation of selenocysteine into proteins. It probably replaces EF-Tu for the insertion of selenocysteine directed by the UGA codon. SelB binds GTP and GDP.	SELB;EFSEC;eEFSec	eukaryotic elongation factor, selenocysteine-tRNA specific
P67775	PPP2CA	3	-0.62	-0.35	-0.87	-0.17	-0.33	-0.05	PP2A is the major phosphatase for microtubule-associated proteins (MAPs). PP2A can modulate the activity of phosphorylase B kinase casein kinase 2, mitogen-stimulated S6 kinase, and MAP-2 kinase. Cooperates with SGO2 to protect centromeric cohesin from separase-mediated cleavage in oocytes specifically during meiosis I (By similarity). Can dephosphorylate SV40 large T antigen and p53/TP53. Activa…	PP2Calpha;PP2AC	protein phosphatase 2 catalytic subunit alpha
Q02878	RPL6	40	-0.62	-0.52	-0.68	-0.12	0.14	-0.4	Component of the large ribosomal subunit. {ECO:0000269|PubMed:23636399, ECO:0000269|PubMed:25901680, ECO:0000269|PubMed:25957688, ECO:0000305|PubMed:12962325}.	TAXREB107;L6;TXREB1	ribosomal protein L6
Q06124	PTPN11	16	-0.62	0.22	-1.36	0.2	0.59	-0.36	Acts downstream of various receptor and cytoplasmic protein tyrosine kinases to participate in the signal transduction from the cell surface to the nucleus. Positively regulates MAPK signal transduction pathway (PubMed:28074573). Dephosphorylates GAB1, ARHGAP35 and EGFR (PubMed:28074573). Dephosphorylates ROCK2 at 'Tyr-722' resulting in stimulatation of its RhoA binding activity. Dephosphorylates…	BPTP3;SH-PTP2;SHP-2;PTP2C;SHP2;NS1	protein tyrosine phosphatase, non-receptor type 11
Q7L775	EPM2AIP1	6	-0.62	-1.58	-0.29	0.24	0.24	0.13	NA	KIAA0766;FLJ11207	EPM2A interacting protein 1
Q8IYB8	SUPV3L1	15	-0.62	-0.69	-0.63	0.04	0.54	-0.62	Major helicase player in mitochondrial RNA metabolism. Component of the mitochondrial degradosome (mtEXO) complex, that degrades 3' overhang double-stranded RNA with a 3'-to-5' directionality in an ATP-dependent manner. ATPase and ATP- dependent multisubstrate helicase, able to unwind double-stranded (ds) DNA and RNA, and RNA/DNA heteroduplexes in the 5'-to-3' direction. Plays a role in the RNA s…	SUV3	Suv3 like RNA helicase
Q9H307	PNN	26	-0.62	-0.41	-0.8	0.15	0.23	0.06	NA	NA	NA
Q9NUL3	STAU2	12	-0.62	-1.11	-0.08	0.65	0.15	1.86	NA	NA	NA
O00592	PODXL	5	-0.61	-0.45	-0.77	-0.26	1.07	0.16	Involved in the regulation of both adhesion and cell morphology and cancer progression. Function as an anti-adhesive molecule that maintains an open filtration pathway between neighboring foot processes in the podocyte by charge repulsion. Acts as a pro-adhesive molecule, enhancing the adherence of cells to immobilized ligands, increasing the rate of migration and cell- cell contacts in an integr…	PCLP;Gp200;PC	podocalyxin like
O43715	TRIAP1	8	-0.61	0.25	-1.72	-1.53	-1.07	-5.22	Involved in the modulation of the mitochondrial apoptotic pathway by ensuring the accumulation of cardiolipin (CL) in mitochondrial membranes. In vitro, the TRIAP1:PRELID1 complex mediates the transfer of phosphatidic acid (PA) between liposomes and probably functions as a PA transporter across the mitochondrion intermembrane space to provide PA for CL synthesis in the inner membrane (PubMed:2393…	P53CSV;WF-1;HSPC132;p53CSV;MDM35	TP53 regulated inhibitor of apoptosis 1
O60493	SNX3	8	-0.61	-0.66	-0.55	0.05	0.19	-0.31	NA	NA	NA
O75145	PPFIA3	3	-0.61	6.41	-5.02	-3.91	-2.97	-5.29	May regulate the disassembly of focal adhesions. May localize receptor-like tyrosine phosphatases type 2A at specific sites on the plasma membrane, possibly regulating their interaction with the extracellular environment and their association with substrates. {ECO:0000269|PubMed:9624153}.	KIAA0654;LPNA3;MGC126567;MGC126569	PTPRF interacting protein alpha 3
O75717	WDHD1	26	-0.61	-1.25	-0.01	-0.06	0.07	-0.2	Acts as a replication initiation factor that brings together the MCM2-7 helicase and the DNA polymerase alpha/primase complex in order to initiate DNA replication. {ECO:0000269|PubMed:19805216}.	AND-1;CTF4;CHTF4	WD repeat and HMG-box DNA binding protein 1
P48200	IREB2	17	-0.61	-0.81	-0.36	-0.34	-0.28	-0.49	NA	NA	NA
P50440	GATM	14	-0.61	-0.26	-0.93	-0.22	-0.13	-0.49	Catalyzes the biosynthesis of guanidinoacetate, the immediate precursor of creatine. Creatine plays a vital role in energy metabolism in muscle tissues. May play a role in embryonic and central nervous system development. May be involved in the response to heart failure by elevating local creatine synthesis. {ECO:0000269|PubMed:16125225, ECO:0000269|PubMed:16614068, ECO:0000269|PubMed:16820567}.	AGAT	glycine amidinotransferase
P53611	RABGGTB	4	-0.61	0.15	-1.2	0.17	0	0.43	Catalyzes the transfer of a geranylgeranyl moiety from geranylgeranyl diphosphate to both cysteines of Rab proteins with the C-terminal sequence -XXCC, -XCXC and -CCXX, such as RAB1A, RAB3A, RAB5A and RAB7A.	NA	Rab geranylgeranyltransferase subunit beta
Q2NKX8	ERCC6L	14	-0.61	-0.37	-0.84	0.54	0.69	0.37	DNA helicase that acts as an essential component of the spindle assembly checkpoint. Contributes to the mitotic checkpoint by recruiting MAD2 to kinetochores and monitoring tension on centromeric chromatin (PubMed:17218258). Acts as a tension sensor that associates with catenated DNA which is stretched under tension until it is resolved during anaphase (PubMed:17218258, PubMed:23973328). Function…	FLJ20105;PICH;RAD26L	ERCC excision repair 6 like, spindle assembly checkpoint helicase
Q9BUI4	POLR3C	6	-0.61	-1.2	0.1	1.37	1.02	1.62	DNA-dependent RNA polymerase catalyzes the transcription of DNA into RNA using the four ribonucleoside triphosphates as substrates. Specific core component of RNA polymerase III which synthesizes small RNAs, such as 5S rRNA and tRNAs. May direct with other members of the subcomplex RNA Pol III binding to the TFIIIB- DNA complex via the interactions between TFIIIB and POLR3F. May be involved eithe…	RPC62;RPC3	RNA polymerase III subunit C
Q9P2R7	SUCLA2	13	-0.61	-0.63	-0.56	-0.43	-0.17	-0.97	ATP-specific succinyl-CoA synthetase functions in the citric acid cycle (TCA), coupling the hydrolysis of succinyl-CoA to the synthesis of ATP and thus represents the only step of substrate-level phosphorylation in the TCA (PubMed:15877282). The beta subunit provides nucleotide specificity of the enzyme and binds the substrate succinate, while the binding sites for coenzyme A and phosphate are fo…	NA	succinate-CoA ligase ADP-forming beta subunit
Q9UJW0	DCTN4	4	-0.61	-1.3	-0.4	0.33	2.39	-3.38	Could have a dual role in dynein targeting and in ACTR1A/Arp1 subunit of dynactin pointed-end capping. Could be involved in ACTR1A pointed-end binding and in additional roles in linking dynein and dynactin to the cortical cytoskeleton.	NA	dynactin subunit 4
Q9Y388	RBMX2	4	-0.61	-1.77	0.58	5.84	-0.02	6.51	NA	CGI-79;Snu17	RNA binding motif protein X-linked 2
O75323	NIPSNAP2	6	-0.6	-0.46	-0.73	-0.17	-0.77	0.77	May act as a positive regulator of L-type calcium channels. {ECO:0000250|UniProtKB:O55126}.	GBAS	nipsnap homolog 2
P04053	DNTT	22	-0.6	-0.63	-0.46	0.74	1.12	-0.01	Template-independent DNA polymerase which catalyzes the random addition of deoxynucleoside 5'-triphosphate to the 3'-end of a DNA initiator. One of the in vivo functions of this enzyme is the addition of nucleotides at the junction (N region) of rearranged Ig heavy chain and T-cell receptor gene segments during the maturation of B- and T-cells. {ECO:0000250|UniProtKB:P09838}.	TDT	DNA nucleotidylexotransferase
P11388	TOP2A	61	-0.6	-0.75	-0.42	-0.13	-0.25	-0.05	NA	NA	NA
P28340	POLD1	34	-0.6	-0.76	-0.49	0.08	0.21	-0.04	As the catalytic component of the trimeric (Pol-delta3 complex) and tetrameric DNA polymerase delta complexes (Pol-delta4 complex), plays a crucial role in high fidelity genome replication, including in lagging strand synthesis, and repair. Exhibits both DNA polymerase and 3'- to 5'-exonuclease activities (PubMed:16510448, PubMed:19074196, PubMed:20334433, PubMed:24035200, PubMed:24022480). Requi…	CDC2;POLD	DNA polymerase delta 1, catalytic subunit
P30084	ECHS1	19	-0.6	0.02	-1.25	-0.49	-0.55	-0.41	Straight-chain enoyl-CoA thioesters from C4 up to at least C16 are processed, although with decreasing catalytic rate. Has high substrate specificity for crotonyl-CoA and moderate specificity for acryloyl-CoA, 3-methylcrotonyl-CoA and methacrylyl-CoA. It is noteworthy that binds tiglyl-CoA, but hydrates only a small amount of this substrate. {ECO:0000269|PubMed:26251176}.	SCEH	enoyl-CoA hydratase, short chain 1
P42566	EPS15	10	-0.6	-0.16	-1.08	-0.01	0.95	-2.2	Involved in cell growth regulation. May be involved in the regulation of mitogenic signals and control of cell proliferation. Involved in the internalization of ligand-inducible receptors of the receptor tyrosine kinase (RTK) type, in particular EGFR. Plays a role in the assembly of clathrin-coated pits (CCPs). Acts as a clathrin adapter required for post-Golgi trafficking. Seems to be involved i…	AF-1P;MLLT5	epidermal growth factor receptor pathway substrate 15
P49770	EIF2B2	13	-0.6	-0.57	-0.67	-0.66	-1.29	0.21	Catalyzes the exchange of eukaryotic initiation factor 2-bound GDP for GTP.	EIF2B;EIF-2Bbeta	eukaryotic translation initiation factor 2B subunit beta
P61024	CKS1B	3	-0.6	-1.04	-0.25	0.03	-0.04	0.18	Binds to the catalytic subunit of the cyclin dependent kinases and is essential for their biological function.	ckshs1;CKS1	CDC28 protein kinase regulatory subunit 1B
Q8IUR7	ARMC8	7	-0.6	-0.78	-0.5	0.73	0.72	0.15	NA	NA	NA
Q8IY81	FTSJ3	17	-0.6	-0.85	-0.31	0.84	0.85	0.75	Probable methyltransferase involved in the processing of the 34S pre-rRNA to 18S rRNA and in 40S ribosomal subunit formation. {ECO:0000255|HAMAP-Rule:MF 03163, ECO:0000269|PubMed:22195017}.	SPB1	FtsJ RNA methyltransferase homolog 3
Q8NCN5	PDPR	19	-0.6	-0.71	-0.51	-0.85	-0.89	-0.95	Decreases the sensitivity of PDP1 to magnesium ions, and this inhibition is reversed by the polyamine spermine. {ECO:0000250}.	PDP3	pyruvate dehydrogenase phosphatase regulatory subunit
Q92600	CNOT9	6	-0.6	0.19	-2.62	-1.61	-1.54	-1.21	Component of the CCR4-NOT complex which is one of the major cellular mRNA deadenylases and is linked to various cellular processes including bulk mRNA degradation, miRNA-mediated repression, translational repression during translational initiation and general transcription regulation. Additional complex functions may be a consequence of its influence on mRNA expression. Involved in down-regulatio…	RCD1;RCD1+;CT129;CAF40;RQCD1	CCR4-NOT transcription complex subunit 9
Q96RR1	TWNK	3	-0.6	-0.01	-1.23	-0.84	-0.49	-1.22	NA	NA	NA
Q99797	MIPEP	9	-0.6	-0.89	-0.44	0.1	0.63	-1.67	Cleaves proteins, imported into the mitochondrion, to their mature size.	MIP	mitochondrial intermediate peptidase
Q9NUL7	DDX28	8	-0.6	0.06	-0.94	0.08	0.48	-0.86	Plays an essential role in facilitating the proper assembly of the mitochondrial large ribosomal subunit and its helicase activity is essential for this function (PubMed:25683708, PubMed:25683715). May be involved in RNA processing or transport. Has RNA and Mg(2+)-dependent ATPase activity (PubMed:11350955). {ECO:0000269|PubMed:11350955, ECO:0000269|PubMed:25683708, ECO:0000269|PubMed:25683715}.	MDDX28;FLJ11282	DEAD-box helicase 28
Q9P0J1	PDP1	4	-0.6	1.32	-3.01	-1.15	-1.12	-1.42	Catalyzes the dephosphorylation and concomitant reactivation of the alpha subunit of the E1 component of the pyruvate dehydrogenase complex. {ECO:0000250}.	PDP;PDH;PPM2A;PPM2C	pyruvate dehyrogenase phosphatase catalytic subunit 1
Q9UJX5	ANAPC4	5	-0.6	-0.6	-0.71	0.71	0.75	0.73	Component of the anaphase promoting complex/cyclosome (APC/C), a cell cycle-regulated E3 ubiquitin ligase that controls progression through mitosis and the G1 phase of the cell cycle. The APC/C complex acts by mediating ubiquitination and subsequent degradation of target proteins: it mainly mediates the formation of 'Lys-11'-linked polyubiquitin chains and, to a lower extent, the formation of 'Ly…	APC4	anaphase promoting complex subunit 4
Q9UPT9	USP22	5	-0.6	-0.98	-0.24	0.42	0.08	0.92	Histone deubiquitinating component of the transcription regulatory histone acetylation (HAT) complex SAGA. Catalyzes the deubiquitination of both histones H2A and H2B, thereby acting as a coactivator. Recruited to specific gene promoters by activators such as MYC, where it is required for transcription. Required for nuclear receptor-mediated transactivation and cell cycle progression. {ECO:000026…	KIAA1063;USP3L	ubiquitin specific peptidase 22
O75529	TAF5L	3	-0.59	17.74	-3.44	-1.6	-1.49	-1.85	Functions as a component of the PCAF complex. The PCAF complex is capable of efficiently acetylating histones in a nucleosomal context. The PCAF complex could be considered as the human version of the yeast SAGA complex.	PAF65B	TATA-box binding protein associated factor 5 like
P11166	SLC2A1	6	-0.59	-0.52	-0.66	-0.3	-0.16	-0.61	Facilitative glucose transporter. This isoform may be responsible for constitutive or basal glucose uptake. Has a very broad substrate specificity; can transport a wide range of aldoses including both pentoses and hexoses. {ECO:0000269|PubMed:18245775, ECO:0000269|PubMed:19449892}.	DYT18;DYT9;GLUT1;GLUT;HTLVR;CSE	solute carrier family 2 member 1
P43250	GRK6	3	-0.59	0.01	-1.47	-2.59	-1.38	-4.43	Specifically phosphorylates the activated forms of G protein-coupled receptors. Such receptor phosphorylation initiates beta-arrestin-mediated receptor desensitization, internalization, and signaling events leading to their desensitization. Seems to be involved in the desensitization of D2-like dopamine receptors in striatum and chemokine receptor CXCR4 which is critical for CXCL12-induced cell c…	GPRK6	G protein-coupled receptor kinase 6
P62987	UBA52	3	-0.59	-0.5	3.37	-3.33	-1.2	-5.74	NA	NA	NA
Q02078	MEF2A	3	-0.59	-7.15	0.56	1.5	-0.87	20.1	NA	NA	NA
Q5TA45	INTS11	5	-0.59	-0.57	-0.69	0.83	0.97	0.6	NA	NA	NA
Q7Z6M1	RABEPK	7	-0.59	-0.72	-0.4	-0.37	-0.53	-0.13	NA	NA	NA
Q92793	CREBBP	9	-0.59	-1.4	0.05	-1.04	-0.37	-1.74	Acetylates histones, giving a specific tag for transcriptional activation. Also acetylates non-histone proteins, like NCOA3 and FOXO1. Binds specifically to phosphorylated CREB and enhances its transcriptional activity toward cAMP-responsive genes. Acts as a coactivator of ALX1. Acts as a circadian transcriptional coactivator which enhances the activity of the circadian transcriptional activators…	RTS;CBP;KAT3A;RSTS	CREB binding protein
Q96T88	UHRF1	30	-0.59	-0.52	-0.66	-0.28	-0.11	-0.78	NA	NA	NA
Q9H845	ACAD9	16	-0.59	-0.62	-0.47	-0.38	-0.16	-0.81	Required for mitochondrial complex I assembly (PubMed:20816094, PubMed:24158852). Has a dehydrogenase activity on palmitoyl-CoA (C16:0) and stearoyl-CoA (C18:0). It is three times more active on palmitoyl-CoA than on stearoyl-CoA. However, it does not play a primary role in long-chain fatty acid oxidation in vivo (PubMed:20816094, PubMed:24158852). Has little activity on octanoyl-CoA (C8:0), buty…	NPD002;MGC14452	acyl-CoA dehydrogenase family member 9
Q9HCS7	XAB2	16	-0.59	-1.03	-0.18	0.12	-0.2	0.59	NA	NA	NA
Q9Y6I4	USP3	3	-0.59	-0.28	-0.9	-1.65	-2.14	-0.92	Hydrolase that deubiquitinates monoubiquitinated target proteins such as histone H2A and H2B. Required for proper progression through S phase and subsequent mitotic entry. May regulate the DNA damage response (DDR) checkpoint through deubiquitination of H2A at DNA damage sites. Associates with the chromatin. {ECO:0000269|PubMed:17980597}.	NA	ubiquitin specific peptidase 3
O00303	EIF3F	23	-0.58	-0.75	-0.45	0.19	-0.1	0.67	Component of the eukaryotic translation initiation factor 3 (eIF-3) complex, which is required for several steps in the initiation of protein synthesis (PubMed:17581632, PubMed:25849773, PubMed:27462815). The eIF-3 complex associates with the 40S ribosome and facilitates the recruitment of eIF-1, eIF-1A, eIF-2:GTP:methionyl-tRNAi and eIF-5 to form the 43S pre- initiation complex (43S PIC). The eI…	eIF3-epsilon;eIF3-p47;eIF3f;EIF3S5	eukaryotic translation initiation factor 3 subunit F
O60346	PHLPP1	5	-0.58	-1.18	-0.34	0.14	0.41	-0.19	Protein phosphatase involved in regulation of Akt and PKC signaling. Mediates dephosphorylation in the C-terminal domain hydrophobic motif of members of the AGC Ser/Thr protein kinase family; specifically acts on 'Ser-473' of AKT2 and AKT3, 'Ser-660' of PRKCB and 'Ser-657' of PRKCA (PubMed:15808505, PubMed:17386267, PubMed:18162466). Isoform 2 seems to have a major role in regulating Akt signalin…	KIAA0606;SCOP;PPM3A;PLEKHE1;PHLPP	PH domain and leucine rich repeat protein phosphatase 1
P11310	ACADM	21	-0.58	-0.4	-0.75	-0.51	-0.53	-0.46	Acyl-CoA dehydrogenase specific for acyl chain lengths of 4 to 16 that catalyzes the initial step of fatty acid beta- oxidation. Utilizes the electron transfer flavoprotein (ETF) as an electron acceptor to transfer electrons to the main mitochondrial respiratory chain via ETF-ubiquinone oxidoreductase (ETF dehydrogenase). {ECO:0000269|PubMed:25416781}.	MCAD;MCADH;ACAD1	acyl-CoA dehydrogenase medium chain
P25705	ATP5F1A	68	-0.58	-0.68	-0.51	-0.05	-0.2	0.17	NA	NA	NA
P37198	NUP62	13	-0.58	-0.43	-0.7	0.1	-0.08	0.41	Essential component of the nuclear pore complex (PubMed:1915414). The N-terminal is probably involved in nucleocytoplasmic transport (PubMed:1915414). The C-terminal is involved in protein-protein interaction probably via coiled-coil formation, promotes its association with centrosomes and may function in anchorage of p62 to the pore complex (PubMed:1915414, PubMed:24107630). Plays a role in mito…	p62;DKFZp547L134;IBSN;SNDI;MGC841;FLJ20822;FLJ43869	nucleoporin 62
P39687	ANP32A	16	-0.58	-0.73	-0.41	-0.08	-0.32	0.33	Implicated in a number of cellular processes, including proliferation, differentiation, caspase-dependent and caspase- independent apoptosis, suppression of transformation (tumor suppressor), inhibition of protein phosphatase 2A, regulation of mRNA trafficking and stability in association with ELAVL1, and inhibition of acetyltransferases as part of the INHAT (inhibitor of histone acetyltransferas…	LANP;PP32;I1PP2A;PHAPI;MAPM;mapmodulin;C15orf1	acidic nuclear phosphoprotein 32 family member A
P41236	PPP1R2	8	-0.58	0.92	-1.37	1.38	1.65	-0.45	Inhibitor of protein-phosphatase 1.	IPP2;PPP1R2A	protein phosphatase 1 regulatory inhibitor subunit 2
P61923	COPZ1	6	-0.58	-0.46	-0.75	-1.23	-0.97	-2.37	The coatomer is a cytosolic protein complex that binds to dilysine motifs and reversibly associates with Golgi non- clathrin-coated vesicles, which further mediate biosynthetic protein transport from the ER, via the Golgi up to the trans Golgi network. Coatomer complex is required for budding from Golgi membranes, and is essential for the retrograde Golgi-to-ER transport of dilysine-tagged protei…	CGI-120;COPZ	coatomer protein complex subunit zeta 1
Q13404	UBE2V1	5	-0.58	-0.64	-0.44	0.87	0.19	1.71	NA	NA	NA
Q16531	DDB1	59	-0.58	-0.57	-0.6	-0.06	0.13	-0.32	Required for DNA repair. Binds to DDB2 to form the UV- damaged DNA-binding protein complex (the UV-DDB complex). The UV- DDB complex may recognize UV-induced DNA damage and recruit proteins of the nucleotide excision repair pathway (the NER pathway) to initiate DNA repair. The UV-DDB complex preferentially binds to cyclobutane pyrimidine dimers (CPD), 6-4 photoproducts (6-4 PP), apurinic sites an…	NA	damage specific DNA binding protein 1
Q5T9A4	ATAD3B	3	-0.58	0.54	-6.02	-1.85	-2.28	-1.19	May play a role in a mitochondrial network organization typical for stem cells, characterized by reduced mitochondrial metabolism, low mtDNA copies and fragmentated mitochondrial network. may act by suppressing ATAD3A function, interfering with ATAD3A interaction with matrix nucleoid complexes. {ECO:0000269|PubMed:22664726}.	TOB3;KIAA1273	ATPase family, AAA domain containing 3B
Q7Z406	MYH14	7	-0.58	-0.75	-0.37	-0.43	0.26	-0.98	NA	NA	NA
Q8IXK0	PHC2	3	-0.58	0.26	-2.03	3.06	2.34	4.68	NA	NA	NA
Q96DE5	ANAPC16	3	-0.58	-0.29	-0.88	0.2	0.45	-1.34	Component of the anaphase promoting complex/cyclosome (APC/C), a cell cycle-regulated E3 ubiquitin ligase that controls progression through mitosis and the G1 phase of the cell cycle. The APC/C complex acts by mediating ubiquitination and subsequent degradation of target proteins: it mainly mediates the formation of 'Lys-11'-linked polyubiquitin chains and, to a lower extent, the formation of 'Ly…	bA570G20.3;FLJ33728;APC16;CENP-27;C10orf104	anaphase promoting complex subunit 16
Q96FS4	SIPA1	7	-0.58	-0.04	-1.39	0.71	1.1	-1.39	GTPase activator for the nuclear Ras-related regulatory proteins Rap1 and Rap2 in vitro, converting them to the putatively inactive GDP-bound state (PubMed:9346962). Affects cell cycle progression (By similarity). {ECO:0000250|UniProtKB:P46062, ECO:0000269|PubMed:9346962}.	SPA1	signal-induced proliferation-associated 1
Q96RU2	USP28	3	-0.58	-0.29	-0.85	-0.25	-0.17	-0.81	Deubiquitinase involved in DNA damage response checkpoint and MYC proto-oncogene stability. Involved in DNA damage induced apoptosis by specifically deubiquitinating proteins of the DNA damage pathway such as CLSPN. Also involved in G2 DNA damage checkpoint, by deubiquitinating CLSPN, and preventing its degradation by the anaphase promoting complex/cyclosome (APC/C). In contrast, it does not deub…	KIAA1515	ubiquitin specific peptidase 28
Q9H3K6	BOLA2B	7	-0.58	-0.83	-0.38	-0.16	0.42	-0.94	Acts as a cytosolic iron-sulfur (Fe-S) cluster assembly factor that facilitates [2Fe-2S] cluster insertion into a subset of cytosolic proteins (PubMed:26613676, PubMed:27519415). Acts together with the monothiol glutaredoxin GLRX3 (PubMed:26613676, PubMed:27519415). {ECO:0000269|PubMed:26613676, ECO:0000269|PubMed:27519415}.	My016;BOLA2A	bolA family member 2
Q9NS91	RAD18	7	-0.58	0.95	-2.1	-0.11	0.62	-1.49	E3 ubiquitin-protein ligase involved in postreplication repair of UV-damaged DNA. Postreplication repair functions in gap- filling of a daughter strand on replication of damaged DNA. Associates to the E2 ubiquitin conjugating enzyme UBE2B to form the UBE2B-RAD18 ubiquitin ligase complex involved in mono- ubiquitination of DNA-associated PCNA on 'Lys-164'. Has ssDNA binding activity. {ECO:0000269|…	RNF73	RAD18, E3 ubiquitin protein ligase
Q9NVE7	PANK4	15	-0.58	-0.43	-0.74	2.24	2.4	1.5	Plays a role in the physiological regulation of the intracellular CoA concentration. {ECO:0000250}.	FLJ10782	pantothenate kinase 4
Q9UQ13	SHOC2	5	-0.58	-0.53	-0.55	-1.13	-1.05	-1.85	Regulatory subunit of protein phosphatase 1 (PP1c) that acts as a M-Ras/MRAS effector and participates in MAPK pathway activation. Upon M-Ras/MRAS activation, targets PP1c to specifically dephosphorylate the 'Ser-259' inhibitory site of RAF1 kinase and stimulate RAF1 activity at specialized signaling complexes. {ECO:0000269|PubMed:10783161, ECO:0000269|PubMed:16630891, ECO:0000269|PubMed:25137548…	KIAA0862;SOC2;SUR-8;SOC-2;SUR8	SHOC2, leucine rich repeat scaffold protein
Q9Y2P8	RCL1	5	-0.58	-0.45	-0.69	-0.96	-0.98	-1.14	Does not have cyclase activity. Plays a role in 40S- ribosomal-subunit biogenesis in the early pre-rRNA processing steps at sites A0, A1 and A2 that are required for proper maturation of the 18S RNA (By similarity). {ECO:0000250}.	RPCL1;RNAC	RNA terminal phosphate cyclase like 1
O14657	TOR1B	8	-0.57	0.15	-1.01	-0.77	0.01	-1.87	May serve as a molecular chaperone assisting in the proper folding of secreted and/or membrane proteins. Plays a role in non-neural cells nuclear envelope and endoplasmic reticulum integrity. May have a redundant function with TOR1A in non-neural tissues. {ECO:0000269|PubMed:23569223, ECO:0000269|PubMed:24275647}.	DQ1;MGC4386	torsin family 1 member B
O75683	SURF6	10	-0.57	-0.54	-0.58	0.43	0.58	0.15	Binds to both DNA and RNA in vitro, with a stronger binding capacity for RNA. May represent a nucleolar constitutive protein involved in ribosomal biosynthesis or assembly (By similarity). {ECO:0000250}.	FLJ30322;RRP14	surfeit 6
P26885	FKBP2	4	-0.57	-1.84	0.07	0.83	2	0.06	PPIases accelerate the folding of proteins. It catalyzes the cis-trans isomerization of proline imidic peptide bonds in oligopeptides.	FKBP-13;PPIase	FKBP prolyl isomerase 2
Q86UP8	GTF2IRD2	4	-0.57	-0.69	-0.12	0.21	0.04	0.5	NA	NA	NA
Q96EK5	KIFBP	8	-0.57	-0.24	-0.94	0.07	0.18	-0.63	Required for organization of axonal microtubules, and axonal outgrowth and maintenance during peripheral and central nervous system development. {ECO:0000269|PubMed:16225668, ECO:0000269|PubMed:20621975, ECO:0000269|PubMed:23427148}.	DKFZP586B0923;TTC20;KBP;KIAA1279	KIF1 binding protein
Q96T37	RBM15	18	-0.57	-0.53	-0.6	-0.11	-0.12	-0.2	NA	NA	NA
Q9NVM4	PRMT7	3	-0.57	-0.75	-0.31	0.4	0.48	0.18	Arginine methyltransferase that can both catalyze the formation of omega-N monomethylarginine (MMA) and symmetrical dimethylarginine (sDMA), with a preference for the formation of MMA. Specifically mediates the symmetrical dimethylation of arginine residues in the small nuclear ribonucleoproteins Sm D1 (SNRPD1) and Sm D3 (SNRPD3); such methylation being required for the assembly and biogenesis of…	FLJ10640;KIAA1933	protein arginine methyltransferase 7
O14727	APAF1	5	-0.56	-0.8	-0.29	-0.48	-0.62	-0.31	NA	NA	NA
O15379	HDAC3	4	-0.56	-0.51	-0.48	-1.59	-1.18	-3.73	Responsible for the deacetylation of lysine residues on the N-terminal part of the core histones (H2A, H2B, H3 and H4), and some other non-histone substrates. Histone deacetylation gives a tag for epigenetic repression and plays an important role in transcriptional regulation, cell cycle progression and developmental events. Histone deacetylases act via the formation of large multiprotein complex…	RPD3;HD3;RPD3-2	histone deacetylase 3
P08238	HSP90AB1	49	-0.56	-0.7	-0.38	-0.38	-0.44	-0.29	Molecular chaperone that promotes the maturation, structural maintenance and proper regulation of specific target proteins involved for instance in cell cycle control and signal transduction. Undergoes a functional cycle that is linked to its ATPase activity. This cycle probably induces conformational changes in the client proteins, thereby causing their activation. Interacts dynamically with var…	HSPC2;HSPCB	heat shock protein 90 alpha family class B member 1
P54105	CLNS1A	8	-0.56	-0.63	-0.48	-0.41	-0.41	-0.74	Chaperone that regulates the assembly of spliceosomal U1, U2, U4 and U5 small nuclear ribonucleoproteins (snRNPs), the building blocks of the spliceosome. Thereby, plays an important role in the splicing of cellular pre-mRNAs. Most spliceosomal snRNPs contain a common set of Sm proteins SNRPB, SNRPD1, SNRPD2, SNRPD3, SNRPE, SNRPF and SNRPG that assemble in a heptameric protein ring on the Sm site…	ICln;CLCI	chloride nucleotide-sensitive channel 1A
P54709	ATP1B3	10	-0.56	-0.04	-1.33	2.11	2.29	0.74	This is the non-catalytic component of the active enzyme, which catalyzes the hydrolysis of ATP coupled with the exchange of Na(+) and K(+) ions across the plasma membrane. The exact function of the beta-3 subunit is not known.	FLJ29027;CD298	ATPase Na+/K+ transporting subunit beta 3
Q5VWZ2	LYPLAL1	4	-0.56	-0.12	-1.12	0.68	0.94	-0.87	Has depalmitoylating activity toward KCNMA1. Does not exhibit phospholipase nor triacylglycerol lipase activity, able to hydrolyze only short chain substrates due to its shallow active site. {ECO:0000269|PubMed:22052940, ECO:0000269|PubMed:22399288}.	Q96AV0	lysophospholipase like 1
Q6DN90	IQSEC1	6	-0.56	-1.01	-0.3	-0.55	-0.38	-0.84	Guanine nucleotide exchange factor for ARF1 and ARF6 (PubMed:24058294). Guanine nucleotide exchange factor activity is enhanced by lipid binding (PubMed:24058294). Accelerates GTP binding by ARFs of all three classes. Guanine nucleotide exchange protein for ARF6, mediating internalisation of beta-1 integrin. {ECO:0000269|PubMed:11226253, ECO:0000269|PubMed:16461286, ECO:0000269|PubMed:24058294}.	KIAA0763;GEP100;BRAG2;ARF-GEP100	IQ motif and Sec7 domain 1
Q6UXH1	CRELD2	3	-0.56	-1.88	-0.45	1.8	0.04	8.48	NA	NA	NA
Q8NB46	ANKRD52	3	-0.56	-1.2	0.7	1.93	2.74	-2.28	Putative regulatory subunit of protein phosphatase 6 (PP6) that may be involved in the recognition of phosphoprotein substrates.	FLJ34236;PP6-ARS-C	ankyrin repeat domain 52
Q8NEC7	GSTCD	3	-0.56	-0.79	0.28	0.69	0.62	0.92	NA	FLJ13273	glutathione S-transferase C-terminal domain containing
Q96A26	FAM162A	6	-0.56	0.34	-0.99	-0.08	0.23	-0.31	Proposed to be involved in regulation of apoptosis; the exact mechanism may differ between cell types/tissues. May be involved in hypoxia-induced cell death of transformed cells implicating cytochrome C release and caspase activation (such as CASP9) and inducing mitochondrial permeability transition. May be involved in hypoxia-induced cell death of neuronal cells probably by promoting release of …	E2IG5;C3orf28	family with sequence similarity 162 member A
Q9H1B7	IRF2BPL	5	-0.56	-0.77	-0.37	0.21	0.26	0.06	May contribute to the control of female reproductive function (By similarity). May play a role in gene transcription by transactivating GNRH1 promoter and repressing PENK promoter. {ECO:0000250}.	EAP1;KIAA1865;C14orf4	interferon regulatory factor 2 binding protein like
Q9H9Y6	POLR1B	24	-0.56	-0.84	-0.3	0.09	0.13	-0.18	NA	NA	NA
Q9Y385	UBE2J1	4	-0.56	-0.29	-0.81	0.52	0.81	0.27	NA	NA	NA
O43747	AP1G1	20	-0.55	-1.44	0.03	0.07	-0.09	0.19	Subunit of clathrin-associated adaptor protein complex 1 that plays a role in protein sorting in the late-Golgi/trans-Golgi network (TGN) and/or endosomes. The AP complexes mediate both the recruitment of clathrin to membranes and the recognition of sorting signals within the cytosolic tails of transmembrane cargo molecules.	CLAPG1;ADTG	adaptor related protein complex 1 subunit gamma 1
O95573	ACSL3	15	-0.55	-0.83	-0.38	-0.03	-0.63	0.96	Acyl-CoA synthetases (ACSL) activates long-chain fatty acids for both synthesis of cellular lipids, and degradation via beta-oxidation. ACSL3 mediates hepatic lipogenesis (By similarity). Preferentially uses myristate, laurate, arachidonate and eicosapentaenoate as substrates (By similarity). Has mainly an anabolic role in energy metabolism. Required for the incorporation of fatty acids into phos…	ACS3;PRO2194;FACL3	acyl-CoA synthetase long chain family member 3
P22033	MMUT	9	-0.55	-0.79	-0.36	-0.04	0.58	-1.5	Involved in the degradation of several amino acids, odd- chain fatty acids and cholesterol via propionyl-CoA to the tricarboxylic acid cycle. MCM has different functions in other species.	MCM;MUT	methylmalonyl-CoA mutase
P49406	MRPL19	5	-0.55	-1.43	0.26	-1.88	-1.85	-1.91	NA	MRP-L15;RPML15;KIAA0104;RLX1	mitochondrial ribosomal protein L19
P55795	HNRNPH2	12	-0.55	-1.22	-0.13	-0.45	-0.3	-0.82	This protein is a component of the heterogeneous nuclear ribonucleoprotein (hnRNP) complexes which provide the substrate for the processing events that pre-mRNAs undergo before becoming functional, translatable mRNAs in the cytoplasm. Binds poly(RG).	hnRNPH';FTP3;HNRPH';HNRPH2	heterogeneous nuclear ribonucleoprotein H2
P84085	ARF5	5	-0.55	-0.61	-0.33	-0.07	0.46	-0.83	GTP-binding protein that functions as an allosteric activator of the cholera toxin catalytic subunit, an ADP- ribosyltransferase. Involved in protein trafficking; may modulate vesicle budding and uncoating within the Golgi apparatus.	NA	ADP ribosylation factor 5
Q03518	TAP1	7	-0.55	-0.08	-18.02	-0.91	-1.13	-0.95	Involved in the transport of antigens from the cytoplasm to the endoplasmic reticulum for association with MHC class I molecules. Also acts as a molecular scaffold for the final stage of MHC class I folding, namely the binding of peptide. Nascent MHC class I molecules associate with TAP via tapasin. Inhibited by the covalent attachment of herpes simplex virus ICP47 protein, which blocks the pepti…	PSF1;RING4;D6S114E;ABCB2	transporter 1, ATP binding cassette subfamily B member
Q04637	EIF4G1	84	-0.55	-0.67	-0.38	0.11	0.04	0.21	NA	NA	NA
Q13613	MTMR1	8	-0.55	0.49	-2.07	0.57	0.26	0.63	Lipid phosphatase that has high specificity for phosphatidylinositol 3-phosphate and has no activity with phosphatidylinositol 4-phosphate, phosphatidylinositol (4,5)- bisphosphate and phosphatidylinositol (3,4,5)-trisphosphate (PubMed:11733541, PubMed:27018598). Activity with phosphatidylinositol (3,5)-bisphosphate is controversial; it has been shown by PubMed:27018598, while PubMed:11733541 fin…	NA	myotubularin related protein 1
Q7Z7A4	PXK	4	-0.55	0.74	-5.55	-1.02	-0.24	-1.8	NA	NA	NA
Q8IWD4	CCDC117	9	-0.55	-0.63	-0.57	-0.87	-0.92	-0.59	NA	FLJ33814	coiled-coil domain containing 117
Q92835	INPP5D	27	-0.55	-0.06	-1.17	0.61	0.21	1.18	Phosphatidylinositol (PtdIns) phosphatase that specifically hydrolyzes the 5-phosphate of phosphatidylinositol- 3,4,5-trisphosphate (PtdIns(3,4,5)P3) to produce PtdIns(3,4)P2, thereby negatively regulating the PI3K (phosphoinositide 3-kinase) pathways. Acts as a negative regulator of B-cell antigen receptor signaling. Mediates signaling from the FC-gamma-RIIB receptor (FCGR2B), playing a central …	SHIP;hp51CN;SHIP1	inositol polyphosphate-5-phosphatase D
Q99871	HAUS7	8	-0.55	-2.79	1.28	0.59	2.12	-1.38	Contributes to mitotic spindle assembly, maintenance of centrosome integrity and completion of cytokinesis as part of the HAUS augmin-like complex. {ECO:0000269|PubMed:19369198, ECO:0000269|PubMed:19427217}.	UIP1;UCHL5IP	HAUS augmin like complex subunit 7
Q99961	SH3GL1	5	-0.55	-0.37	-0.69	0.88	1.33	0.78	Implicated in endocytosis. May recruit other proteins to membranes with high curvature (By similarity). {ECO:0000250}.	SH3P8;SH3D2B;CNSA1;EEN;MGC111371	SH3 domain containing GRB2 like 1, endophilin A2
Q9BQS8	FYCO1	5	-0.55	-1.29	0.98	2.62	2.8	-0.18	May mediate microtubule plus end-directed vesicle transport. {ECO:0000269|PubMed:20100911}.	FLJ13335;ZFYVE7	FYVE and coiled-coil domain containing 1
Q9C0C2	TNKS1BP1	6	-0.55	1.22	-1.52	-0.86	0.08	-1.6	NA	TAB182;KIAA1741;FLJ45975	tankyrase 1 binding protein 1
Q9NY61	AATF	9	-0.55	-0.07	-1.02	-0.28	-0.05	-1.44	May function as a general inhibitor of the histone deacetylase HDAC1. Binding to the pocket region of RB1 may displace HDAC1 from RB1/E2F complexes, leading to activation of E2F target genes and cell cycle progression. Conversely, displacement of HDAC1 from SP1 bound to the CDKN1A promoter leads to increased expression of this CDK inhibitor and blocks cell cycle progression. Also antagonizes PAWR…	DED;CHE-1;CHE1;BFR2	apoptosis antagonizing transcription factor
Q9UJY4	GGA2	6	-0.55	-0.69	-0.43	-0.37	-0.34	-0.3	Plays a role in protein sorting and trafficking between the trans-Golgi network (TGN) and endosomes. Mediates the ARF- dependent recruitment of clathrin to the TGN and binds ubiquitinated proteins and membrane cargo molecules with a cytosolic acidic cluster-dileucine (AC-LL) motif.	VEAR;KIAA1080	golgi associated, gamma adaptin ear containing, ARF binding protein 2
Q9Y4F3	MARF1	4	-0.55	-2.47	0.09	-0.2	-0.09	-0.85	NA	NA	NA
O60315	ZEB2	3	-0.54	3.55	-2.73	4.89	19.17	0.37	Transcriptional inhibitor that binds to DNA sequence 5'- CACCT-3' in different promoters. Represses transcription of E- cadherin. {ECO:0000269|PubMed:16061479}.	KIAA0569;SIP-1;SIP1;ZFHX1B	zinc finger E-box binding homeobox 2
P34897	SHMT2	43	-0.54	-0.53	-0.57	-0.28	-0.17	-0.35	Contributes to the de novo mitochondrial thymidylate biosynthesis pathway via its role in glycine and tetrahydrofolate metabolism. Thymidylate biosynthesis is required to prevent uracil accumulation in mtDNA (PubMed:21876188). Interconversion of serine and glycine (PubMed:25619277). Associates with mitochondrial DNA (PubMed:18063578). Plays a role in the deubiquitination of target proteins as com…	SHMT	serine hydroxymethyltransferase 2
P50579	METAP2	23	-0.54	-0.4	-0.67	0.55	0.53	0.16	Cotranslationally removes the N-terminal methionine from nascent proteins. The N-terminal methionine is often cleaved when the second residue in the primary sequence is small and uncharged (Met-Ala-, Cys, Gly, Pro, Ser, Thr, or Val). The catalytic activity of human METAP2 toward Met-Val peptides is consistently two orders of magnitude higher than that of METAP1, suggesting that it is responsible …	MNPEP;p67;MAP2	methionyl aminopeptidase 2
P55884	EIF3B	51	-0.54	-0.35	-0.71	0.02	-0.08	0.16	RNA-binding component of the eukaryotic translation initiation factor 3 (eIF-3) complex, which is required for several steps in the initiation of protein synthesis (PubMed:9388245, PubMed:17581632, PubMed:25849773, PubMed:27462815). The eIF-3 complex associates with the 40S ribosome and facilitates the recruitment of eIF-1, eIF-1A, eIF-2:GTP:methionyl-tRNAi and eIF-5 to form the 43S pre-initiatio…	PRT1;eIF3b;EIF3S9	eukaryotic translation initiation factor 3 subunit B
Q02127	DHODH	9	-0.54	-0.47	-0.61	0.25	0.26	0.1	Catalyzes the conversion of dihydroorotate to orotate with quinone as electron acceptor.	NA	dihydroorotate dehydrogenase (quinone)
Q02252	ALDH6A1	13	-0.54	-0.49	-0.6	-0.1	-0.28	0.1	Plays a role in valine and pyrimidine metabolism. Binds fatty acyl-CoA.	MMSDH	aldehyde dehydrogenase 6 family member A1
Q13232	NME3	3	-0.54	-0.22	-0.82	2.44	1.38	18.77	Major role in the synthesis of nucleoside triphosphates other than ATP. The ATP gamma phosphate is transferred to the NDP beta phosphate via a ping-pong mechanism, using a phosphorylated active-site intermediate. Probably has a role in normal hematopoiesis by inhibition of granulocyte differentiation and induction of apoptosis.	DR-nm23;NM23-H3;NDPKC	NME/NM23 nucleoside diphosphate kinase 3
Q13501	SQSTM1	8	-0.54	-0.65	-0.33	1	0.11	2.22	Autophagy receptor that interacts directly with both the cargo to become degraded and an autophagy modifier of the MAP1 LC3 family (PubMed:16286508, PubMed:20168092, PubMed:24128730, PubMed:28404643). Along with WDFY3, involved in the formation and autophagic degradation of cytoplasmic ubiquitin-containing inclusions (p62 bodies, ALIS/aggresome-like induced structures). Along with SQSTM1, require…	p62;p60;p62B;A170;PDB3;OSIL	sequestosome 1
Q69YH5	CDCA2	4	-0.54	-0.37	-0.44	0.6	0.6	0.26	Regulator of chromosome structure during mitosis required for condensin-depleted chromosomes to retain their compact architecture through anaphase. Acts by mediating the recruitment of phopsphatase PP1-gamma subunit (PPP1CC) to chromatin at anaphase and into the following interphase. At anaphase onset, its association with chromatin targets a pool of PPP1CC to dephosphorylate substrates. {ECO:000…	Repo-Man;PPP1R81	cell division cycle associated 2
Q8N0Z6	TTC5	10	-0.54	-0.25	-0.81	0.33	0.24	0.65	Adapter protein involved in p53/TP53 response that acts by regulating and mediating the assembly of multi-protein complexes. Required to facilitate the interaction between JMY and p300/EP300 and increase p53/TP53-dependent transcription and apoptosis. Prevents p53/TP53 degradation by MDM2 (By similarity). {ECO:0000250}.	Strap	tetratricopeptide repeat domain 5
Q96E39	RBMXL1	4	-0.54	0.64	-2.47	0.36	-0.22	1.36	RNA-binding protein which may be involved in pre-mRNA splicing. {ECO:0000250}.	KAT3	RBMX like 1
Q9P0U4	CXXC1	5	-0.54	-0.52	-0.48	-1.25	-0.23	-1.14	Transcriptional activator that exhibits a unique DNA binding specificity for CpG unmethylated motifs with a preference for CpGG. {ECO:0000269|PubMed:21407193}.	HsT2645;PCCX1;hCGBP;PHF18;CGBP;SPP1;CFP1;ZCGPC1	CXXC finger protein 1
O15294	OGT	34	-0.53	-0.73	-0.37	0.28	0.71	-0.32	Catalyzes the transfer of a single N-acetylglucosamine from UDP-GlcNAc to a serine or threonine residue in cytoplasmic and nuclear proteins resulting in their modification with a beta- linked N-acetylglucosamine (O-GlcNAc) (PubMed:26678539). Glycosylates a large and diverse number of proteins including histone H2B, AKT1, EZH2, PFKL, KMT2E/MLL5, MAPT/TAU and HCFC1 (PubMed:26678539). Can regulate t…	O-GLCNAC;HRNT1;MGC22921;FLJ23071;OGT1	O-linked N-acetylglucosamine (GlcNAc) transferase
O43709	BUD23	4	-0.53	-0.38	-0.19	-0.39	6.27	-2.53	S-adenosyl-L-methionine-dependent methyltransferase that specifically methylates the N(7) position of a guanine in 18S rRNA (PubMed:25851604). Requires the methyltransferase adapter protein TRM112 for full rRNA methyltransferase activity (PubMed:25851604). Involved in the pre-rRNA processing steps leading to small-subunit rRNA production independently of its RNA-modifying catalytic activity (PubM…	MGC19709;MGC2022;MGC5140;PP3381;WBMT;MERM1;WBSCR22	BUD23, rRNA methyltransferase and ribosome maturation factor
O75164	KDM4A	7	-0.53	-0.58	-0.52	0.07	-0.38	0.82	Histone demethylase that specifically demethylates 'Lys- 9' and 'Lys-36' residues of histone H3, thereby playing a central role in histone code (PubMed:26741168). Does not demethylate histone H3 'Lys-4', H3 'Lys-27' nor H4 'Lys-20'. Demethylates trimethylated H3 'Lys-9' and H3 'Lys-36' residue, while it has no activity on mono- and dimethylated residues. Demethylation of Lys residue generates for…	KIAA0677;JHDM3A;TDRD14A;JMJD2;JMJD2A	lysine demethylase 4A
P23284	PPIB	34	-0.53	-0.65	-0.45	0.14	0.1	0.04	PPIases accelerate the folding of proteins. It catalyzes the cis-trans isomerization of proline imidic peptide bonds in oligopeptides.	CYPB;OI9;PPIase;B;CYP-S1;SCYLP	peptidylprolyl isomerase B
P26358	DNMT1	42	-0.53	-0.6	-0.44	0.15	0.3	-0.25	Methylates CpG residues. Preferentially methylates hemimethylated DNA. Associates with DNA replication sites in S phase maintaining the methylation pattern in the newly synthesized strand, that is essential for epigenetic inheritance. Associates with chromatin during G2 and M phases to maintain DNA methylation independently of replication. It is responsible for maintaining methylation patterns es…	MCMT;CXXC9;DNMT	DNA methyltransferase 1
P31937	HIBADH	9	-0.53	-1.61	0	-0.25	-0.41	-0.24	NA	NS5ATP1	3-hydroxyisobutyrate dehydrogenase
P48729	CSNK1A1	7	-0.53	-1.17	-0.08	0	-0.02	-0.01	NA	NA	NA
P55957	BID	3	-0.53	-1.02	0.23	-1.62	-0.98	-2.15	The major proteolytic product p15 BID allows the release of cytochrome c (By similarity). Isoform 1, isoform 2 and isoform 4 induce ICE-like proteases and apoptosis. Isoform 3 does not induce apoptosis. Counters the protective effect of Bcl-2. {ECO:0000250, ECO:0000269|PubMed:14583606}.	NA	BH3 interacting domain death agonist
Q6NUQ1	RINT1	3	-0.53	-4.03	0.01	0.22	1.04	-1.5	Involved in regulation of membrane traffic between the Golgi and the endoplasmic reticulum (ER); the function is proposed to depend on its association in the NRZ complex which is believed to play a role in SNARE assembly at the ER. May play a role in cell cycle checkpoint control (PubMed:11096100). Essential for telomere length control (PubMed:16600870). {ECO:0000269|PubMed:11096100, ECO:0000269|…	FLJ11785;RINT-1	RAD50 interactor 1
Q6P587	FAHD1	4	-0.53	-0.35	-0.64	0.79	0.58	0.78	Probable mitochondrial acylpyruvase which is able to hydrolyze acetylpyruvate and fumarylpyruvate in vitro (PubMed:15551868, PubMed:21878618). Also has oxaloacetate decarboxylase activity (PubMed:25575590). {ECO:0000269|PubMed:15551868, ECO:0000269|PubMed:21878618, ECO:0000269|PubMed:25575590}.	DKFZP566J2046;C16orf36	fumarylacetoacetate hydrolase domain containing 1
Q7L1Q6	BZW1	27	-0.53	-0.49	-0.54	-0.19	-0.01	-0.44	Enhances histone H4 gene transcription but does not seem to bind DNA directly. {ECO:0000269|PubMed:11524015}.	BZAP45;KIAA0005	basic leucine zipper and W2 domains 1
Q96D46	NMD3	14	-0.53	-0.33	-0.7	0.06	0.28	-0.02	Acts as an adapter for the XPO1/CRM1-mediated export of the 60S ribosomal subunit. {ECO:0000269|PubMed:12724356, ECO:0000269|PubMed:12773398}.	CGI-07	NMD3 ribosome export adaptor
Q96HW7	INTS4	7	-0.53	0.68	-2.52	0.1	0.02	0.09	Component of the Integrator (INT) complex, a complex involved in the small nuclear RNAs (snRNA) U1 and U2 transcription and in their 3'-box-dependent processing. The Integrator complex is associated with the C-terminal domain (CTD) of RNA polymerase II largest subunit (POLR2A) and is recruited to the U1 and U2 snRNAs genes (Probable). Mediates recruitment of cytoplasmic dynein to the nuclear enve…	INT4;MGC16733;MST093	integrator complex subunit 4
Q9BUH6	PAXX	6	-0.53	-1.86	0.57	0.14	0.38	-0.54	Involved in non-homologous end joining (NHEJ), a major pathway to repair double-strand breaks in DNA. May act as a scaffold required to stabilize the Ku heterodimer, composed of XRCC5/Ku80 and XRCC6/Ku70, at double-strand break sites and promote the assembly and/or stability of the NHEJ machinery. {ECO:0000269|PubMed:25574025, ECO:0000269|PubMed:25670504, ECO:0000269|PubMed:25941166}.	XLS;C9orf142	PAXX, non-homologous end joining factor
Q9NUG6	PDRG1	3	-0.53	-0.25	-0.81	0.23	0.1	0.34	May play a role in chaperone-mediated protein folding. {ECO:0000305}.	dJ310O13.3;C20orf126	p53 and DNA damage regulated 1
Q9P2E9	RRBP1	42	-0.53	-0.45	-0.56	0.01	0.14	-0.21	NA	NA	NA
Q9UGP8	SEC63	9	-0.53	-0.73	-0.5	1.06	1	0.94	Required for integral membrane and secreted preprotein translocation across the endoplasmic reticulum membrane.	SEC63L;PRO2507;ERdj2;DNAJC23	SEC63 homolog, protein translocation regulator
Q9Y6N1	COX11	4	-0.53	-1.72	0.37	0.14	0.25	-0.34	Exerts its effect at some terminal stage of cytochrome c oxidase synthesis, probably by being involved in the insertion of the copper B into subunit I. {ECO:0000250}.	COX11P	cytochrome c oxidase copper chaperone COX11
O00231	PSMD11	29	-0.52	0.22	-1.12	-0.35	-0.07	-0.85	Component of the 26S proteasome, a multiprotein complex involved in the ATP-dependent degradation of ubiquitinated proteins. This complex plays a key role in the maintenance of protein homeostasis by removing misfolded or damaged proteins, which could impair cellular functions, and by removing proteins whose functions are no longer required. Therefore, the proteasome participates in numerous cell…	S9;p44.5;MGC3844;Rpn6	proteasome 26S subunit, non-ATPase 11
O00291	HIP1	9	-0.52	0.73	-1.39	-1.02	-1.62	-0.06	Plays a role in clathrin-mediated endocytosis and trafficking (PubMed:11532990, PubMed:11577110, PubMed:11889126). Involved in regulating AMPA receptor trafficking in the central nervous system in an NMDA-dependent manner (By similarity). Regulates presynaptic nerve terminal activity (By similarity). Enhances androgen receptor (AR)-mediated transcription (PubMed:16027218). May act as a proapoptot…	ILWEQ	huntingtin interacting protein 1
O94906	PRPF6	35	-0.52	-0.38	-0.62	0.06	0.1	-0.15	NA	NA	NA
P07686	HEXB	8	-0.52	-0.31	-0.71	-0.65	-0.65	-0.77	Responsible for the degradation of GM2 gangliosides, and a variety of other molecules containing terminal N-acetyl hexosamines, in the brain and other tissues.	NA	hexosaminidase subunit beta
P08648	ITGA5	11	-0.52	-0.88	-0.16	-0.68	-1.12	0	Integrin alpha-5/beta-1 is a receptor for fibronectin and fibrinogen. It recognizes the sequence R-G-D in its ligands. ITGA5:ITGB1 binds to PLA2G2A via a site (site 2) which is distinct from the classical ligand-binding site (site 1) and this induces integrin conformational changes and enhanced ligand binding to site 1 (PubMed:18635536, PubMed:25398877). ITGA5:ITGB1 acts as a receptor for fibrill…	CD49e;FNRA	integrin subunit alpha 5
P35221	CTNNA1	3	-0.52	0.52	-1.98	-4.86	-13.69	-4.14	Associates with the cytoplasmic domain of a variety of cadherins. The association of catenins to cadherins produces a complex which is linked to the actin filament network, and which seems to be of primary importance for cadherins cell-adhesion properties. Can associate with both E- and N-cadherins. Originally believed to be a stable component of E-cadherin/catenin adhesion complexes and to media…	CAP102	catenin alpha 1
P55786	NPEPPS	34	-0.52	-0.24	-0.79	-0.2	-0.02	-0.49	Aminopeptidase with broad substrate specificity for several peptides. Involved in proteolytic events essential for cell growth and viability. May act as regulator of neuropeptide activity. Plays a role in the antigen-processing pathway for MHC class I molecules. Involved in the N-terminal trimming of cytotoxic T-cell epitope precursors. Digests the poly-Q peptides found in many cellular proteins.…	PSA;MP100	aminopeptidase puromycin sensitive
P56279	TCL1A	6	-0.52	-0.32	-0.7	-0.19	0.03	-0.38	Enhances the phosphorylation and activation of AKT1, AKT2 and AKT3. Promotes nuclear translocation of AKT1. Enhances cell proliferation, stabilizes mitochondrial membrane potential and promotes cell survival. {ECO:0000269|PubMed:10716693, ECO:0000269|PubMed:10983986, ECO:0000269|PubMed:11707444, ECO:0000269|PubMed:11839817}.	TCL1	T cell leukemia/lymphoma 1A
Q15054	POLD3	11	-0.52	-1.02	-0.18	0.26	0.02	0.64	As a component of the trimeric and tetrameric DNA polymerase delta complexes (Pol-delta3 and Pol-delta4, respectively), plays a role in high fidelity genome replication, including in lagging strand synthesis, and repair. Required for optimal Pol-delta activity. Stabilizes the Pol-delta complex and plays a major role in Pol-delta stimulation by PCNA (PubMed:10219083, PubMed:10852724, PubMed:115957…	P66;KIAA0039;P68;PPP1R128	DNA polymerase delta 3, accessory subunit
Q6NYC8	PPP1R18	20	-0.52	-0.52	-0.5	-0.18	-0.24	-0.11	NA	NA	NA
Q6WCQ1	MPRIP	8	-0.52	-0.15	-0.89	-0.58	-0.11	-2.71	Targets myosin phosphatase to the actin cytoskeleton. Required for the regulation of the actin cytoskeleton by RhoA and ROCK1. Depletion leads to an increased number of stress fibers in smooth muscle cells through stabilization of actin fibers by phosphorylated myosin. Overexpression of MRIP as well as its F- actin-binding region leads to disassembly of stress fibers in neuronal cells. {ECO:00002…	RHOIP3;M-RIP;p116Rip	myosin phosphatase Rho interacting protein
Q6YHU6	THADA	9	-0.52	-0.05	-1.02	-0.65	-0.06	-1.11	NA	NA	NA
Q9GZL7	WDR12	28	-0.52	-0.37	-0.67	-0.69	-0.63	-0.84	Component of the PeBoW complex, which is required for maturation of 28S and 5.8S ribosomal RNAs and formation of the 60S ribosome. {ECO:0000255|HAMAP-Rule:MF 03029, ECO:0000269|PubMed:16043514, ECO:0000269|PubMed:17353269}.	YTM1;FLJ10881	WD repeat domain 12
Q9Y2K7	KDM2A	12	-0.52	-0.4	-0.62	-0.76	-1.91	0.76	NA	NA	NA
Q9Y3B9	RRP15	5	-0.52	-0.57	-0.63	-2.54	-3.12	-1.72	NA	CGI-115;KIAA0507	ribosomal RNA processing 15 homolog
Q9Y5X3	SNX5	15	-0.52	-0.99	0.29	0.29	-0.17	1.03	Involved in several stages of intracellular trafficking. Interacts with membranes containing phosphatidylinositol 3- phosphate (PtdIns(3P)) or phosphatidylinositol 3,4-bisphosphate (PtdIns(3,4)P2) (PubMed:15561769). Acts in part as component of the retromer membrane-deforming SNX-BAR subcomplex. The SNX-BAR retromer mediates retrograde transport of cargo proteins from endosomes to the trans-Golgi…	NA	sorting nexin 5
O15126	SCAMP1	5	-0.51	-1.56	0.78	4.14	2.99	6.12	Functions in post-Golgi recycling pathways. Acts as a recycling carrier to the cell surface.	SCAMP37	secretory carrier membrane protein 1
P17174	GOT1	13	-0.51	-1	0.38	-0.75	-1.2	-0.04	Biosynthesis of L-glutamate from L-aspartate or L- cysteine. Important regulator of levels of glutamate, the major excitatory neurotransmitter of the vertebrate central nervous system. Acts as a scavenger of glutamate in brain neuroprotection. The aspartate aminotransferase activity is involved in hepatic glucose synthesis during development and in adipocyte glyceroneogenesis. Using L-cysteine as…	AST1	glutamic-oxaloacetic transaminase 1
P61073	CXCR4	3	-0.51	-0.81	-0.29	-0.13	-0.05	-0.25	Receptor for the C-X-C chemokine CXCL12/SDF-1 that transduces a signal by increasing intracellular calcium ion levels and enhancing MAPK1/MAPK3 activation. Acts as a receptor for extracellular ubiquitin; leading to enhanced intracellular calcium ions and reduced cellular cAMP levels. Involved in hematopoiesis and in cardiac ventricular septum formation. Also plays an essential role in vasculariza…	LESTR;NPY3R;HM89;NPYY3R;D2S201E;fusin;HSY3RR;NPYR;CD184	C-X-C motif chemokine receptor 4
Q00013	MPP1	19	-0.51	-0.32	-0.65	-0.07	-0.02	-0.15	Essential regulator of neutrophil polarity. Regulates neutrophil polarization by regulating AKT1 phosphorylation through a mechanism that is independent of PIK3CG activity (By similarity). {ECO:0000250}.	PEMP;DXS552E	membrane palmitoylated protein 1
Q07021	C1QBP	13	-0.51	-0.11	-0.93	0.6	0.15	1.29	Is believed to be a multifunctional and multicompartmental protein involved in inflammation and infection processes, ribosome biogenesis, regulation of apoptosis, transcriptional regulation and pre-mRNA splicing. At the cell surface is thought to act as an endothelial receptor for plasma proteins of the complement and kallikrein-kinin cascades. Putative receptor for C1q; specifically binds to the…	gC1Q-R;gC1qR;p32;SF2p32;HABP1	complement C1q binding protein
Q09161	NCBP1	24	-0.51	-0.68	-0.19	0.08	0.38	-0.37	Component of the cap-binding complex (CBC), which binds cotranscriptionally to the 5'-cap of pre-mRNAs and is involved in various processes such as pre-mRNA splicing, translation regulation, nonsense-mediated mRNA decay, RNA-mediated gene silencing (RNAi) by microRNAs (miRNAs) and mRNA export. The CBC complex is involved in mRNA export from the nucleus via its interaction with ALYREF/THOC4/ALY, l…	CBP80;Sto1;NCBP	nuclear cap binding protein subunit 1
Q15014	MORF4L2	5	-0.51	-1.45	-0.16	-0.55	-0.66	-0.38	Component of the NuA4 histone acetyltransferase complex which is involved in transcriptional activation of select genes principally by acetylation of nucleosomal histone H4 and H2A. This modification may both alter nucleosome - DNA interactions and promote interaction of the modified histones with other proteins which positively regulate transcription. This complex may be required for the activat…	KIAA0026;MRGX	mortality factor 4 like 2
Q15369	ELOC	7	-0.51	-0.47	-0.54	0.16	0.11	-0.04	SIII, also known as elongin, is a general transcription elongation factor that increases the RNA polymerase II transcription elongation past template-encoded arresting sites. Subunit A is transcriptionally active and its transcription activity is strongly enhanced by binding to the dimeric complex of the SIII regulatory subunits B and C (elongin BC complex) (PubMed:7821821). In embryonic stem cel…	SIII;TCEB1	elongin C
Q6NT76	HMBOX1	3	-0.51	-1.28	0.63	-1.2	-0.59	-15.36	Transcription factor. Isoform 1 acts as a transcriptional repressor. Isoform 4 has very low activity as a transcriptional repressor. {ECO:0000269|PubMed:16825764, ECO:0000269|PubMed:19757162}.	HNF1LA;PBHNF;FLJ21616;HOT1	homeobox containing 1
Q8N806	UBR7	8	-0.51	-0.21	-0.79	-0.29	-0.14	-0.8	E3 ubiquitin-protein ligase which is a component of the N-end rule pathway. Recognizes and binds to proteins bearing specific N-terminal residues that are destabilizing according to the N-end rule, leading to their ubiquitination and subsequent degradation. {ECO:0000250}.	C14orf130	ubiquitin protein ligase E3 component n-recognin 7 (putative)
Q99497	PARK7	38	-0.51	-0.48	-0.54	0.51	0.69	0.32	Protein and nucleotide deglycase that catalyzes the deglycation of the Maillard adducts formed between amino groups of proteins or nucleotides and reactive carbonyl groups of glyoxals (PubMed:25416785, PubMed:28596309). Thus, functions as a protein deglycase that repairs methylglyoxal- and glyoxal-glycated proteins, and releases repaired proteins and lactate or glycolate, respectively. Deglycates…	DJ-1;DJ1;GATD2	Parkinsonism associated deglycase
Q9NQ29	LUC7L	12	-0.51	-0.18	-0.79	-0.37	-0.11	-0.66	May bind to RNA via its Arg/Ser-rich domain. {ECO:0000269|PubMed:11170747}.	LUC7B1;hLuc7B1;Luc7	LUC7 like
Q9NRX4	PHPT1	8	-0.51	-0.48	-0.37	-0.9	-0.38	-1.62	Exhibits phosphohistidine phosphatase activity. {ECO:0000269|PubMed:19836471, ECO:0000269|PubMed:25574816}.	PHP14;HSPC141;CGI-202;DKFZp564M173;bA216L13.10	phosphohistidine phosphatase 1
Q9Y4B4	RAD54L2	6	-0.51	-0.97	0.31	-1.06	-3.45	0.76	DNA helicase that modulates androgen receptor (AR)- dependent transactivation in a promoter-dependent manner. Not able to remodel mononucleosomes in vitro (By similarity). {ECO:0000250}.	KIAA0809;SRISNF2L;ARIP4	RAD54 like 2
O00541	PES1	22	-0.5	0.3	-1.52	-0.01	0.05	-0.31	Component of the PeBoW complex, which is required for maturation of 28S and 5.8S ribosomal RNAs and formation of the 60S ribosome. {ECO:0000255|HAMAP-Rule:MF 03028, ECO:0000269|PubMed:16738141, ECO:0000269|PubMed:17189298, ECO:0000269|PubMed:17353269}.	PES;NOP7	pescadillo ribosomal biogenesis factor 1
O00762	UBE2C	11	-0.5	-1.02	0.21	-0.24	-0.08	-0.49	Accepts ubiquitin from the E1 complex and catalyzes its covalent attachment to other proteins. In vitro catalyzes 'Lys- 11'- and 'Lys-48'-linked polyubiquitination. Acts as an essential factor of the anaphase promoting complex/cyclosome (APC/C), a cell cycle-regulated ubiquitin ligase that controls progression through mitosis. Acts by initiating 'Lys-11'-linked polyubiquitin chains on APC/C subst…	UBCH10	ubiquitin conjugating enzyme E2 C
O43684	BUB3	28	-0.5	-0.95	-0.21	-2.11	-2.74	-0.55	Has a dual function in spindle-assembly checkpoint signaling and in promoting the establishment of correct kinetochore-microtubule (K-MT) attachments. Promotes the formation of stable end-on bipolar attachments. Necessary for kinetochore localization of BUB1. Regulates chromosome segregation during oocyte meiosis. The BUB1/BUB3 complex plays a role in the inhibition of anaphase-promoting complex …	BUB3L	BUB3, mitotic checkpoint protein
O60502	OGA	21	-0.5	-0.39	-0.51	-0.96	0.34	-2.18	NA	NA	NA
O95721	SNAP29	16	-0.5	-0.51	-0.48	-0.19	0.23	-0.76	SNAREs, soluble N-ethylmaleimide-sensitive factor- attachment protein receptors, are essential proteins for fusion of cellular membranes. SNAREs localized on opposing membranes assemble to form a trans-SNARE complex, an extended, parallel four alpha-helical bundle that drives membrane fusion. SNAP29 is a SNARE involved in autophagy through the direct control of autophagosome membrane fusion with …	SNAP-29;CEDNIK	synaptosome associated protein 29
P16989	YBX3	7	-0.5	-0.4	-0.57	-0.2	-0.13	-0.52	Binds to the GM-CSF promoter. Seems to act as a repressor. Binds also to full-length mRNA and to short RNA sequences containing the consensus site 5'-UCCAUCA-3'. May have a role in translation repression (By similarity). {ECO:0000250}.	dbpA;ZONAB;CSDA1;CSDA	Y-box binding protein 3
P23786	CPT2	11	-0.5	-0.6	-0.42	-0.64	-0.6	-0.65	NA	CPTASE;CPT1	carnitine palmitoyltransferase 2
P42345	MTOR	9	-0.5	-1.16	0.65	0.11	0.56	-1.03	Serine/threonine protein kinase which is a central regulator of cellular metabolism, growth and survival in response to hormones, growth factors, nutrients, energy and stress signals. MTOR directly or indirectly regulates the phosphorylation of at least 800 proteins. Functions as part of 2 structurally and functionally distinct signaling complexes mTORC1 and mTORC2 (mTOR complex 1 and 2). Activat…	RAFT1;RAPT1;FLJ44809;FRAP;FRAP2;FRAP1	mechanistic target of rapamycin kinase
P49643	PRIM2	12	-0.5	-0.81	-0.32	-0.18	-0.63	0.51	DNA primase is the polymerase that synthesizes small RNA primers for the Okazaki fragments made during discontinuous DNA replication.	PRIM2A	DNA primase subunit 2
Q02543	RPL18A	23	-0.5	-0.28	-0.68	-0.66	-0.6	-0.7	NA	L18A	ribosomal protein L18a
Q8NBT2	SPC24	6	-0.5	-0.37	-0.6	0.1	0.24	-0.04	Acts as a component of the essential kinetochore- associated NDC80 complex, which is required for chromosome segregation and spindle checkpoint activity (PubMed:14738735). Required for kinetochore integrity and the organization of stable microtubule binding sites in the outer plate of the kinetochore (PubMed:14738735). The NDC80 complex synergistically enhances the affinity of the SKA1 complex fo…	FLJ90806;SPBC24	SPC24, NDC80 kinetochore complex component
Q99575	POP1	6	-0.5	-0.31	-0.67	0.1	0.11	-0.21	Component of ribonuclease P, a protein complex that generates mature tRNA molecules by cleaving their 5'-ends. Also a component of RNase MRP.	NA	POP1 homolog, ribonuclease P/MRP subunit
Q9H0P0	NT5C3A	8	-0.5	-0.51	-0.42	-0.08	0.23	-0.58	NA	NA	NA
Q9NQ88	TIGAR	10	-0.5	-1.07	0	0.18	0.19	0.18	Fructose-bisphosphatase hydrolyzing fructose-2,6- bisphosphate as well as fructose-1,6-bisphosphate (PubMed:19015259). Acts as a negative regulator of glycolysis by lowering intracellular levels of fructose-2,6-bisphosphate in a p53/TP53-dependent manner, resulting in the pentose phosphate pathway (PPP) activation and NADPH production (PubMed:16839880, PubMed:22887998). Contributes to the generat…	C12orf5	TP53 induced glycolysis regulatory phosphatase
Q9NUQ2	AGPAT5	5	-0.5	-0.04	-1.04	-0.06	-1.48	1.5	Converts lysophosphatidic acid (LPA) into phosphatidic acid by incorporating an acyl moiety at the sn-2 position of the glycerol backbone. Acts on LPA containing saturated or unsaturated fatty acids C15:0-C20:4 at the sn-1 position using C18:1-CoA as the acyl donor. Also acts on lysophosphatidylethanolamine using oleoyl-CoA, but not arachidonoyl-CoA, and lysophosphatidylinositol using arachidonoy…	FLJ11210;LPAAT-e;LPAAT-epsilon	1-acylglycerol-3-phosphate O-acyltransferase 5
Q04727	TLE4	6	-0.49	-0.46	-0.5	-0.02	0.11	-0.18	NA	NA	NA
Q07866	KLC1	29	-0.49	-0.3	-0.67	0.04	0.12	-0.13	NA	NA	NA
Q13242	SRSF9	9	-0.49	-0.87	-0.25	0.71	0.38	1.25	Plays a role in constitutive splicing and can modulate the selection of alternative splice sites. Represses the splicing of MAPT/Tau exon 10. {ECO:0000269|PubMed:10196175, ECO:0000269|PubMed:11875052, ECO:0000269|PubMed:12024014, ECO:0000269|PubMed:12604611, ECO:0000269|PubMed:15009090, ECO:0000269|PubMed:15009664, ECO:0000269|PubMed:15695522, ECO:0000269|PubMed:7556075}.	SRp30c;SFRS9	serine and arginine rich splicing factor 9
Q13243	SRSF5	9	-0.49	-0.29	-0.67	0	0.1	-0.19	Plays a role in constitutive splicing and can modulate the selection of alternative splice sites.	SRP40;HRS;SFRS5	serine and arginine rich splicing factor 5
Q5SSJ5	HP1BP3	13	-0.49	-0.69	-0.16	0	-0.21	0.45	NA	NA	NA
Q7Z7E8	UBE2Q1	8	-0.49	0	-0.98	-0.05	-0.86	2	NA	NA	NA
Q8WU90	ZC3H15	18	-0.49	-0.3	-0.66	0.29	0.12	0.45	Protects DRG1 from proteolytic degradation. {ECO:0000250}.	LEREPO4	zinc finger CCCH-type containing 15
Q96C90	PPP1R14B	8	-0.49	-0.91	-0.16	-0.04	0.07	-0.43	Inhibitor of PPP1CA. Has over 50-fold higher inhibitory activity when phosphorylated (By similarity). {ECO:0000250}.	SOM172;PNG;PHI-1;PLCB3N	protein phosphatase 1 regulatory inhibitor subunit 14B
Q9BQ52	ELAC2	38	-0.49	-0.59	-0.38	0.05	-0.04	0.1	Zinc phosphodiesterase, which displays mitochondrial tRNA 3'-processing endonuclease activity. Involved in tRNA maturation, by removing a 3'-trailer from precursor tRNA. {ECO:0000269|PubMed:21593607}.	FLJ10530;HPC2	elaC ribonuclease Z 2
Q9C0B0	UNK	8	-0.49	-0.72	-0.21	-0.2	-0.05	-0.54	Sequence-specific RNA-binding protein which plays an important role in the establishment and maintenance of the early morphology of cortical neurons during embryonic development. Acts as a translation repressor and controls a translationally regulated cell morphology program to ensure proper structuring of the nervous system. Translational control depends on recognition of its binding element wit…	KIAA1753;ZC3HDC5;ZC3H5	unk zinc finger
Q9NR45	NANS	16	-0.49	-0.44	-0.53	-0.28	-0.16	-0.37	Produces N-acetylneuraminic acid (Neu5Ac) and 2-keto-3- deoxy-D-glycero-D-galacto-nononic acid (KDN). Can also use N- acetylmannosamine 6-phosphate and mannose 6-phosphate as substrates to generate phosphorylated forms of Neu5Ac and KDN, respectively.	SAS	N-acetylneuraminate synthase
Q9NRZ9	HELLS	13	-0.49	-0.67	-0.32	-0.37	-0.87	0.43	NA	NA	NA
Q9UFC0	LRWD1	4	-0.49	1.56	-2.76	-0.94	-0.95	-0.88	Required for G1/S transition. Recruits and stabilizes the origin recognition complex (ORC) onto chromatin during G1 to establish pre-replication complex (preRC) and to heterochromatic sites in post-replicated cells. Binds a combination of DNA and histone methylation repressive marks on heterochromatin. Binds histone H3 and H4 trimethylation marks H3K9me3, H3K27me3 and H4K20me3 in a cooperative ma…	DKFZp434K1815;ORCA;CENP-33	leucine rich repeats and WD repeat domain containing 1
Q9UII4	HERC5	14	-0.49	-0.15	-0.83	0.45	0.36	0.39	Major E3 ligase for ISG15 conjugation. Acts as a positive regulator of innate antiviral response in cells induced by interferon. Functions as part of the ISGylation machinery that recognizes target proteins in a broad and relatively non-specific manner. Catalyzes ISGylation of IRF3 which results in sustained activation, it attenuates IRF3-PIN1 interaction, which antagonizes IRF3 ubiquitination an…	CEB1	HECT and RLD domain containing E3 ubiquitin protein ligase 5
Q9Y618	NCOR2	5	-0.49	-0.69	-0.27	-0.2	-0.52	0.19	Transcriptional corepressor. Mediates the transcriptional repression activity of some nuclear receptors by promoting chromatin condensation, thus preventing access of the basal transcription. Isoform 1 and isoform 5 have different affinities for different nuclear receptors. Involved in the regulation BCL6-dependent of the germinal center (GC) reactions, mainly through the control of the GC B-cell…	SMRT;SMRTE;TRAC-1;CTG26;TNRC14	nuclear receptor corepressor 2
Q9Y6I3	EPN1	4	-0.49	0.81	-2.51	-0.81	0.02	-2.4	Binds to membranes enriched in phosphatidylinositol 4,5- bisphosphate (PtdIns(4,5)P2). Modifies membrane curvature and facilitates the formation of clathrin-coated invaginations (By similarity). Regulates receptor-mediated endocytosis. {ECO:0000250, ECO:0000269|PubMed:10557078}.	NA	epsin 1
O00471	EXOC5	9	-0.48	-0.68	-0.3	1.9	2.02	0.73	Component of the exocyst complex involved in the docking of exocytic vesicles with fusion sites on the plasma membrane.	SEC10;SEC10P;SEC10L1	exocyst complex component 5
O43847	NRDC	19	-0.48	-0.39	-0.57	0.09	0.47	-0.44	Cleaves peptide substrates on the N-terminus of arginine residues in dibasic pairs.	hNRD1;hNRD2;NRD1	nardilysin convertase
O75319	DUSP11	5	-0.48	-0.37	-0.54	0	-0.53	0.83	Possesses RNA 5'-triphosphatase and diphosphatase activities, but displays a poor protein-tyrosine phosphatase activity. In addition, has phosphatase activity with ATP, ADP and O-methylfluorescein phosphate (in vitro). Binds to RNA. May participate in nuclear mRNA metabolism. {ECO:0000269|PubMed:10347225, ECO:0000269|PubMed:24447265, ECO:0000269|PubMed:9685386}.	PIR1	dual specificity phosphatase 11
P0DOX6	NA	5	-0.48	-0.26	-0.69	-0.17	-0.02	-0.24	NA	NA	NA
P62847	RPS24	21	-0.48	-0.29	-0.67	-0.29	-0.25	-0.57	Required for processing of pre-rRNA and maturation of 40S ribosomal subunits. {ECO:0000269|PubMed:18230666}.	S24;eS24	ribosomal protein S24
Q16594	TAF9	3	-0.48	-0.13	-0.83	0.21	-0.12	0.71	Essential for cell viability. TAF9 and TAF9B are involved in transcriptional activation as well as repression of distinct but overlapping sets of genes. May have a role in gene regulation associated with apoptosis. TAFs are components of the transcription factor IID (TFIID) complex, the TBP-free TAFII complex (TFTC), the PCAF histone acetylase complex and the STAGA transcription coactivator-HAT c…	TAFII31;TAFII32;TAFIID32;MGC5067;CGI-137;MGC1603;MGC3647;AD-004;TAF2G	TATA-box binding protein associated factor 9
Q5VTR2	RNF20	37	-0.48	-0.39	-0.57	-0.2	-0.16	-0.25	NA	NA	NA
Q6IBS0	TWF2	23	-0.48	-0.63	-0.39	-0.24	-0.34	-0.14	Actin-binding protein involved in motile and morphological processes. Inhibits actin polymerization, likely by sequestering G-actin. By capping the barbed ends of filaments, it also regulates motility. Seems to play an important role in clathrin-mediated endocytosis and distribution of endocytic organelles. May play a role in regulating the mature length of the middle and short rows of stereocili…	A6RP;A6r;PTK9L	twinfilin actin binding protein 2
Q86XZ4	SPATS2	7	-0.48	4.96	-2.14	-0.09	1.38	-0.52	NA	SPATA10;SCR59;FLJ13117	spermatogenesis associated serine rich 2
Q8WVB6	CHTF18	19	-0.48	-1.66	0.25	-2.57	-3.12	-1.81	Chromosome cohesion factor involved in sister chromatid cohesion and fidelity of chromosome transmission. Component of one of the cell nuclear antigen loader complexes, CTF18-replication factor C (CTF18-RFC), which consists of CTF18, CTF8, DCC1, RFC2, RFC3, RFC4 and RFC5. The CTF18-RFC complex binds to single- stranded and primed DNAs and has weak ATPase activity that is stimulated by the presenc…	CHL12;C321D2.4;Ctf18;C16orf41	chromosome transmission fidelity factor 18
Q96A49	SYAP1	11	-0.48	-0.38	-0.44	0.75	2.85	-3.8	Plays a role in adipocyte differentiation by promoting mTORC2-mediated phosphorylation of AKT1 at 'Ser-473' after growth factor stimulation (PubMed:23300339). {ECO:0000269|PubMed:23300339}.	FLJ14495;PRO3113	synapse associated protein 1
Q9BTY7	HGH1	9	-0.48	-0.6	-0.41	-0.26	0.21	-1.36	NA	FLJ40907;LOC51236;Brp16;C8orf30A;FAM203B;C8orf30B;FAM203A	HGH1 homolog
Q9HD26	GOPC	7	-0.48	-0.65	-0.33	-0.1	-0.76	0.98	Plays a role in intracellular protein trafficking and degradation. May regulate CFTR chloride currents and acid-induced ASIC3 currents by modulating cell surface expression of both channels. May also regulate the intracellular trafficking of the ADR1B receptor. May play a role in autophagy. Overexpression results in CFTR intracellular retention and degradation in the lysosomes. {ECO:0000269|PubMe…	dJ94G16.2;PIST;FIG;GOPC1;CAL	golgi associated PDZ and coiled-coil motif containing
Q9NV06	DCAF13	10	-0.48	-0.56	-0.38	-0.26	-0.2	-0.51	Possible role in ribosomal RNA processing (By similarity). May function as a substrate receptor for CUL4-DDB1 E3 ubiquitin-protein ligase complex. {ECO:0000250, ECO:0000269|PubMed:16949367}.	DKFZP564O0463;Gm83;HSPC064;Sof1;WDSOF1	DDB1 and CUL4 associated factor 13
Q9UI30	TRMT112	7	-0.48	-0.02	-1.09	-0.44	-0.54	-0.2	Acts as an activator of both rRNA/tRNA and protein methyltransferases (PubMed:25851604). Together with methyltransferase BUD23, methylates the N(7) position of a guanine in 18S rRNA (PubMed:25851604). The heterodimer with HEMK2/N6AMT1 catalyzes N5-methylation of ETF1 on 'Gln-185', using S-adenosyl L- methionine as methyl donor (PubMed:18539146). The heterodimer with ALKBH8 catalyzes the methylati…	HSPC152;HSPC170;TRM112;TRMT11-2;hTrm112	tRNA methyltransferase subunit 11-2
Q9Y3I0	RTCB	26	-0.48	-0.49	-0.4	0.27	0.55	-0.23	Catalytic subunit of the tRNA-splicing ligase complex that acts by directly joining spliced tRNA halves to mature-sized tRNAs by incorporating the precursor-derived splice junction phosphate into the mature tRNA as a canonical 3',5'- phosphodiester. May act as an RNA ligase with broad substrate specificity, and may function toward other RNAs. {ECO:0000269|PubMed:21311021, ECO:0000269|PubMed:24870…	HSPC117;FAAP;C22orf28	RNA 2',3'-cyclic phosphate and 5'-OH ligase
Q9Y4W2	LAS1L	23	-0.48	-0.22	-0.73	-0.07	-0.46	0.53	Involved in the biogenesis of the 60S ribosomal subunit. Required for maturation of the 28S rRNA. Functions as a component of the Five Friends of Methylated CHTOP (5FMC) complex; the 5FMC complex is recruited to ZNF148 by methylated CHTOP, leading to desumoylation of ZNF148 and subsequent transactivation of ZNF148 target genes. {ECO:0000269|PubMed:20647540, ECO:0000269|PubMed:22872859}.	FLJ12525	LAS1 like, ribosome biogenesis factor
Q9Y5B0	CTDP1	12	-0.48	-0.42	0.2	0.12	0.73	-0.32	Processively dephosphorylates 'Ser-2' and 'Ser-5' of the heptad repeats YSPTSPS in the C-terminal domain of the largest RNA polymerase II subunit. This promotes the activity of RNA polymerase II. Plays a role in the exit from mitosis by dephosphorylating crucial mitotic substrates (USP44, CDC20 and WEE1) that are required for M-phase-promoting factor (MPF)/CDK1 inactivation. {ECO:0000269|PubMed:2…	FCP1	CTD phosphatase subunit 1
O15037	KHNYN	3	-0.47	-18.67	0.11	-0.03	0.24	-0.14	NA	KIAA0323	KH and NYN domain containing
O43143	DHX15	60	-0.47	-1.21	-0.05	-0.91	-1.37	-0.16	Pre-mRNA processing factor involved in disassembly of spliceosomes after the release of mature mRNA. In cooperation with TFIP11 seem to be involved in the transition of the U2, U5 and U6 snRNP-containing IL complex to the snRNP-free IS complex leading to efficient debranching and turnover of excised introns. {ECO:0000269|PubMed:19103666}.	HRH2;DBP1;PRP43;PrPp43p;PRPF43;DDX15	DEAH-box helicase 15
O94776	MTA2	26	-0.47	-0.81	-0.22	-0.5	-0.79	-0.07	May be involved in the regulation of gene expression as repressor and activator. The repression might be related to covalent modification of histone proteins.	MTA1-L1;MTA1L1	metastasis associated 1 family member 2
Q13287	NMI	6	-0.47	-0.15	-0.91	0.34	0.09	0.36	May be involved in augmenting coactivator protein recruitment to a group of sequence-specific transcription factors. Augments cytokine-mediated STAT transcription. Enhances CBP/p300 coactivator protein recruitment to STAT1 and STAT5.	NA	N-myc and STAT interactor
Q13425	SNTB2	5	-0.47	-0.41	-0.51	0.22	0.34	0.02	Adapter protein that binds to and probably organizes the subcellular localization of a variety of membrane proteins. May link various receptors to the actin cytoskeleton and the dystrophin glycoprotein complex. May play a role in the regulation of secretory granules via its interaction with PTPRN.	EST25263;SNT3;SNT2B2;SNTL;D16S2531E	syntrophin beta 2
Q16836	HADH	24	-0.47	-0.42	-0.53	-0.21	-0.05	-0.52	Plays an essential role in the mitochondrial beta- oxidation of short chain fatty acids. Exerts it highest activity toward 3-hydroxybutyryl-CoA.	HADH1;SCHAD;HADHSC	hydroxyacyl-CoA dehydrogenase
Q6IAA8	LAMTOR1	4	-0.47	-0.21	-0.7	0.37	1.45	0.16	As part of the Ragulator complex it is involved in amino acid sensing and activation of mTORC1, a signaling complex promoting cell growth in response to growth factors, energy levels, and amino acids. Activated by amino acids through a mechanism involving the lysosomal V-ATPase, the Ragulator functions as a guanine nucleotide exchange factor activating the small GTPases Rag. Activated Ragulator a…	FLJ20625;p18;p27RF-Rho;Pdro;Ragulator1;C11orf59	late endosomal/lysosomal adaptor, MAPK and MTOR activator 1
Q8IY22	CMIP	4	-0.47	-1.6	1.03	-2.6	-3.7	0.44	Plays a role in T-cell signaling pathway. Isoform 2 may play a role in T-helper 2 (Th2) signaling pathway and seems to represent the first proximal signaling protein that links T-cell receptor-mediated signal to the activation of c-Maf Th2 specific factor. {ECO:0000269|PubMed:12939343, ECO:0000269|PubMed:15128042}.	NA	c-Maf inducing protein
Q96KB5	PBK	18	-0.47	-0.35	-0.58	-0.43	-0.32	-0.83	Phosphorylates MAP kinase p38. Seems to be active only in mitosis. May also play a role in the activation of lymphoid cells. When phosphorylated, forms a complex with TP53, leading to TP53 destabilization and attenuation of G2/M checkpoint during doxorubicin-induced DNA damage. {ECO:0000269|PubMed:10781613, ECO:0000269|PubMed:17482142}.	TOPK;FLJ14385;Nori-3;SPK;CT84	PDZ binding kinase
Q96P16	RPRD1A	7	-0.47	-0.3	-0.61	0.33	0.2	0.53	Interacts with phosphorylated C-terminal heptapeptide repeat domain (CTD) of the largest RNA polymerase II subunit POLR2A, and participates in dephosphorylation of the CTD by RPAP2. May act as a negative regulator of cyclin-D1 (CCND1) and cyclin-E (CCNE1) in the cell cycle. {ECO:0000269|PubMed:22231121, ECO:0000269|PubMed:24399136, ECO:0000269|PubMed:24997600}.	P15RS;FLJ10656;HsT3101	regulation of nuclear pre-mRNA domain containing 1A
Q9BRD0	BUD13	8	-0.47	-0.16	-0.78	0.02	0.07	-0.18	NA	MGC13125;fSAP71;Cwc26	BUD13 homolog
Q9NXV6	CDKN2AIP	18	-0.47	-0.82	0.33	-1.46	-1.79	-1.16	Regulates DNA damage response in a dose-dependent manner through a number of signaling pathways involved in cell proliferation, apoptosis and senescence. {ECO:0000269|PubMed:15109303, ECO:0000269|PubMed:24825908}.	FLJ20036;CARF	CDKN2A interacting protein
Q9NZN8	CNOT2	7	-0.47	-0.46	-0.48	0.28	-0.11	0.87	Component of the CCR4-NOT complex which is one of the major cellular mRNA deadenylases and is linked to various cellular processes including bulk mRNA degradation, miRNA-mediated repression, translational repression during translational initiation and general transcription regulation. Additional complex functions may be a consequence of its influence on mRNA expression. Required for the CCR4-NOT …	CDC36;NOT2H;NOT2	CCR4-NOT transcription complex subunit 2
O75607	NPM3	10	-0.46	0.13	-1.05	-0.35	-0.52	-0.17	May act as a chaperone.	NA	nucleophosmin/nucleoplasmin 3
O94766	B3GAT3	3	-0.46	-0.09	-0.83	0.66	1.18	0.19	Glycosaminoglycans biosynthesis (PubMed:25893793). Involved in forming the linkage tetrasaccharide present in heparan sulfate and chondroitin sulfate. Transfers a glucuronic acid moiety from the uridine diphosphate-glucuronic acid (UDP-GlcUA) to the common linkage region trisaccharide Gal-beta-1,3-Gal-beta-1,4- Xyl covalently bound to a Ser residue at the glycosaminylglycan attachment site of pro…	GlcAT-I	beta-1,3-glucuronyltransferase 3
P09651	HNRNPA1	33	-0.46	-0.33	-0.56	0.19	-0.04	0.53	Involved in the packaging of pre-mRNA into hnRNP particles, transport of poly(A) mRNA from the nucleus to the cytoplasm and may modulate splice site selection (PubMed:17371836). May bind to specific miRNA hairpins (PubMed:28431233). {ECO:0000269|PubMed:17371836, ECO:0000269|PubMed:28431233}.	hnRNPA1;hnRNP-A1;ALS20;HNRPA1	heterogeneous nuclear ribonucleoprotein A1
P14373	TRIM27	4	-0.46	2	-1.51	-0.46	-0.26	-0.74	E3 ubiquitin-protein ligase that mediates ubiquitination of PIK3C2B and inhibits its activity; mediates the formation of 'Lys-48'-linked polyubiquitin chains; the function inhibits CD4 T- cell activation. Acts as a regulator of retrograde transport: together with MAGEL2, mediates the formation of 'Lys-63'-linked polyubiquitin chains at 'Lys-220' of WASHC1, leading to promote endosomal F-actin ass…	RNF76;RFP	tripartite motif containing 27
P20290	BTF3	13	-0.46	-1.65	0.37	0.37	0.38	0.27	When associated with NACA, prevents inappropriate targeting of non-secretory polypeptides to the endoplasmic reticulum (ER). Binds to nascent polypeptide chains as they emerge from the ribosome and blocks their interaction with the signal recognition particle (SRP), which normally targets nascent secretory peptides to the ER. BTF3 is also a general transcription factor that can form a stable comp…	BTF3a;BTF3b;NACB	basic transcription factor 3
P35269	GTF2F1	11	-0.46	-0.27	-0.63	-0.52	-0.41	-0.17	TFIIF is a general transcription initiation factor that binds to RNA polymerase II and helps to recruit it to the initiation complex in collaboration with TFIIB. It promotes transcription elongation. {ECO:0000269|PubMed:10428810}.	TFIIF;BTF4;RAP74;TF2F1	general transcription factor IIF subunit 1
P84098	RPL19	28	-0.46	-0.09	-0.8	-0.59	-0.73	-0.3	NA	FLJ27452;MGC71997;DKFZp779D216;L19	ribosomal protein L19
Q03701	CEBPZ	9	-0.46	0.46	-1.08	1.15	1.33	0.79	Stimulates transcription from the HSP70 promoter.	CBF2;CTF2	CCAAT enhancer binding protein zeta
Q13867	BLMH	31	-0.46	-0.5	-0.42	-0.82	-0.92	-0.67	The normal physiological role of BLM hydrolase is unknown, but it catalyzes the inactivation of the antitumor drug BLM (a glycopeptide) by hydrolyzing the carboxamide bond of its B- aminoalaninamide moiety thus protecting normal and malignant cells from BLM toxicity. {ECO:0000250}.	BH	bleomycin hydrolase
Q2M2I8	AAK1	8	-0.46	-0.25	-0.64	0.25	0.59	0.49	Regulates clathrin-mediated endocytosis by phosphorylating the AP2M1/mu2 subunit of the adaptor protein complex 2 (AP-2) which ensures high affinity binding of AP-2 to cargo membrane proteins during the initial stages of endocytosis. Isoform 1 and isoform 2 display similar levels of kinase activity towards AP2M1. Regulates phosphorylation of other AP-2 subunits as well as AP-2 localization and AP…	KIAA1048;DKFZp686K16132	AP2 associated kinase 1
Q6VMQ6	ATF7IP	3	-0.46	-0.35	-0.5	0.09	0.18	-0.1	NA	NA	NA
Q8N668	COMMD1	5	-0.46	0.12	-1.23	0.15	0.05	0.55	Proposed scaffold protein that is implicated in diverse physiological processes and whose function may be in part linked to its ability to regulate ubiquitination of specific cellular proteins. Can modulate activity of cullin-RING E3 ubiquitin ligase (CRL) complexes by displacing CAND1; in vitro promotes CRL E3 activity and dissociates CAND1 from CUL1 and CUL2 (PubMed:21778237). Promotes ubiquiti…	MURR1;MGC27155;C2orf5	copper metabolism domain containing 1
Q8WXI9	GATAD2B	20	-0.46	-0.53	-0.41	0.02	0.02	0	Transcriptional repressor. Enhances MBD2-mediated repression. Efficient repression requires the presence of GATAD2A. Targets MBD3 to discrete loci in the nucleus. May play a role in synapse development. {ECO:0000269|PubMed:12183469, ECO:0000269|PubMed:16415179}.	P66beta	GATA zinc finger domain containing 2B
Q96CP2	FLYWCH2	4	-0.46	0.2	-1.34	0.76	0.2	1.52	NA	NA	FLYWCH family member 2
Q99471	PFDN5	14	-0.46	-0.4	-0.52	0	0.11	-0.27	Binds specifically to cytosolic chaperonin (c-CPN) and transfers target proteins to it. Binds to nascent polypeptide chain and promotes folding in an environment in which there are many competing pathways for nonnative proteins. Represses the transcriptional activity of MYC. {ECO:0000269|PubMed:9630229}.	PFD5;MM-1	prefoldin subunit 5
Q9BWH6	RPAP1	3	-0.46	-0.41	-0.52	0.82	0.46	1.34	Forms an interface between the RNA polymerase II enzyme and chaperone/scaffolding protein, suggesting that it is required to connect RNA polymerase II to regulators of protein complex formation. Required for interaction of the RNA polymerase II complex with acetylated histone H3. {ECO:0000269|PubMed:17643375}.	DKFZP727M111;KIAA1403;MGC858;FLJ12732	RNA polymerase II associated protein 1
Q9BZE9	ASPSCR1	4	-0.46	-0.11	-0.77	0.85	0.4	1.55	Tethering protein that sequesters GLUT4-containing vesicles in the cytoplasm in the absence of insulin. Modulates the amount of GLUT4 that is available at the cell surface (By similarity). Enhances VCP methylation catalyzed by VCPKMT. {ECO:0000250, ECO:0000269|PubMed:23349634}.	ASPS;ASPL;UBXD9;UBXN9;TUG	ASPSCR1, UBX domain containing tether for SLC2A4
Q9H4A6	GOLPH3	8	-0.46	-0.76	-0.26	-1.68	-2.25	-0.8	Phosphatidylinositol-4-phosphate-binding protein that links Golgi membranes to the cytoskeleton and may participate in the tensile force required for vesicle budding from the Golgi. Thereby, may play a role in Golgi membrane trafficking and could indirectly give its flattened shape to the Golgi apparatus. May also bind to the coatomer to regulate Golgi membrane trafficking. May play a role in ant…	GPP34;GOPP1;MIDAS;Vps74	golgi phosphoprotein 3
Q9H6D7	HAUS4	5	-0.46	-0.18	-0.73	-0.25	-0.47	0.02	Contributes to mitotic spindle assembly, maintenance of centrosome integrity and completion of cytokinesis as part of the HAUS augmin-like complex. {ECO:0000269|PubMed:19369198, ECO:0000269|PubMed:19427217}.	FLJ20424;C14orf94	HAUS augmin like complex subunit 4
Q9NXD2	MTMR10	4	-0.46	-2.22	0.61	0.57	0.29	0.83	Probable pseudophosphatase. Contains a Glu residue instead of a conserved Cys residue in the dsPTPase catalytic loop which renders it catalytically inactive as a phosphatase (Potential). {ECO:0000305}.	FLJ20313	myotubularin related protein 10
Q9UNY4	TTF2	21	-0.46	-0.47	-0.47	-0.18	0.03	-0.41	DsDNA-dependent ATPase which acts as a transcription termination factor by coupling ATP hydrolysis with removal of RNA polymerase II from the DNA template. May contribute to mitotic transcription repression. May also be involved in pre-mRNA splicing. {ECO:0000269|PubMed:10455150, ECO:0000269|PubMed:12927788, ECO:0000269|PubMed:15125840, ECO:0000269|PubMed:9748214}.	HuF2;ZGRF6	transcription termination factor 2
Q9Y2I7	PIKFYVE	8	-0.46	0.67	-1.35	-1.33	-1.12	-1.24	The PI(3,5)P2 regulatory complex regulates both the synthesis and turnover of phosphatidylinositol 3,5-bisphosphate (PtdIns(3,5)P2). Catalyzes the phosphorylation of phosphatidylinositol 3-phosphate on the fifth hydroxyl of the myo- inositol ring, to form phosphatidylinositol 3,5-bisphosphate. Required for endocytic-vacuolar pathway and nuclear migration. Plays a role in the biogenesis of endosom…	MGC40423;KIAA0981;PIKfyve;PIP5K;p235;ZFYVE29;FAB1;PIP5K3	phosphoinositide kinase, FYVE-type zinc finger containing
O00566	MPHOSPH10	15	-0.45	0.2	-1.35	-0.9	-1.05	-0.58	Component of the 60-80S U3 small nucleolar ribonucleoprotein (U3 snoRNP). Required for the early cleavages during pre-18S ribosomal RNA processing.	MPP10;MPP10P;CT90;PPP1R106	M-phase phosphoprotein 10
O15144	ARPC2	28	-0.45	-0.57	-0.17	-0.04	-0.06	-0.18	Functions as actin-binding component of the Arp2/3 complex which is involved in regulation of actin polymerization and together with an activating nucleation-promoting factor (NPF) mediates the formation of branched actin networks. Seems to contact the mother actin filament.	p34-Arc;ARC34	actin related protein 2/3 complex subunit 2
O15372	EIF3H	31	-0.45	-0.06	-0.83	-0.48	-0.28	-0.58	Component of the eukaryotic translation initiation factor 3 (eIF-3) complex, which is required for several steps in the initiation of protein synthesis (PubMed:17581632, PubMed:25849773, PubMed:27462815). The eIF-3 complex associates with the 40S ribosome and facilitates the recruitment of eIF-1, eIF-1A, eIF-2:GTP:methionyl-tRNAi and eIF-5 to form the 43S pre- initiation complex (43S PIC). The eI…	eIF3-gamma;eIF3-p40;eIF3h;EIF3S3	eukaryotic translation initiation factor 3 subunit H
O75165	DNAJC13	26	-0.45	-0.96	-0.23	-0.54	-0.17	-0.86	NA	NA	NA
P01871	NA	7	-0.45	-1.05	0.11	-0.98	-1.2	-0.47	NA	NA	NA
P0C0S5	H2AZ1	13	-0.45	-0.21	-0.67	-0.51	-0.55	-0.74	Variant histone H2A which replaces conventional H2A in a subset of nucleosomes. Nucleosomes wrap and compact DNA into chromatin, limiting DNA accessibility to the cellular machineries which require DNA as a template. Histones thereby play a central role in transcription regulation, DNA repair, DNA replication and chromosomal stability. DNA accessibility is regulated via a complex set of post-tran…	H2A.Z;H2AZ	H2A histone family member Z
P33981	TTK	14	-0.45	-1.99	0.53	0.38	0.24	0.76	Phosphorylates proteins on serine, threonine, and tyrosine. Probably associated with cell proliferation. Essential for chromosome alignment by enhancing AURKB activity (via direct CDCA8 phosphorylation) at the centromere, and for the mitotic checkpoint. {ECO:0000269|PubMed:18243099}.	MPS1;MPS1L1;CT96;MPH1	TTK protein kinase
P46783	RPS10	22	-0.45	-0.37	-0.5	-0.01	-0.22	0.24	Component of the 40S ribosomal subunit.	MGC88819;S10	ribosomal protein S10
P61421	ATP6V0D1	8	-0.45	-0.86	-0.02	-0.29	0.08	-1.15	Subunit of the integral membrane V0 complex of vacuolar ATPase. Vacuolar ATPase is responsible for acidifying a variety of intracellular compartments in eukaryotic cells, thus providing most of the energy required for transport processes in the vacuolar system. May play a role in coupling of proton transport and ATP hydrolysis (By similarity). May play a role in cilium biogenesis through regulati…	ATP6DV;VATX;VPATPD;P39;Vma6;ATP6D	ATPase H+ transporting V0 subunit d1
Q6IQ49	SDE2	8	-0.45	-0.04	-0.82	-0.07	0.01	-0.11	Involved in both DNA replication and cell cycle control (PubMed:27906959). Unprocessed SDE2 interacts with PCNA via its PIP-box. The interaction with PCNA prevents monoubiquitination of the latter thereby inhibiting translesion DNA synthesis. The binding of SDE2 to PCNA also leads to processing of SDE2 by an unidentified deubiquinating enzyme, cleaving off the N-terminal ubiquitin-like domain. Th…	FLJ35382;C1orf55	SDE2 telomere maintenance homolog
Q71UI9	H2AZ2	13	-0.45	-0.21	-0.67	-0.51	-0.55	-0.74	Variant histone H2A which replaces conventional H2A in a subset of nucleosomes. Nucleosomes wrap and compact DNA into chromatin, limiting DNA accessibility to the cellular machineries which require DNA as a template. Histones thereby play a central role in transcription regulation, DNA repair, DNA replication and chromosomal stability. DNA accessibility is regulated via a complex set of post-tran…	MGC10170;MGC10831;MGC1947;H2AV	H2A histone family member V
Q8NEM2	SHCBP1	14	-0.45	0.25	-1.14	-0.13	-0.21	-0.05	May play a role in signaling pathways governing cellular proliferation, cell growth and differentiation. May be a component of a novel signaling pathway downstream of Shc. Acts as a positive regulator of FGF signaling in neural progenitor cells. {ECO:0000250|UniProtKB:Q9Z179}.	FLJ22009;PAL	SHC binding and spindle associated 1
Q8TBF4	ZCRB1	4	-0.45	0.19	-0.94	0.14	-0.25	0.76	NA	MADP-1;MADP1;RBM36;ZCCHC19;SNRNP31	zinc finger CCHC-type and RNA binding motif containing 1
Q92990	GLMN	5	-0.45	-0.46	-0.43	0.36	0.43	0.11	Essential for normal development of the vasculature. May represent a naturally occurring ligand of the immunophilins FKBP59 and FKBP12. May function as an membrane anchoring protein. Isoform 1 may stimulate the p70S6K pathway. Isoform 2 may inhibit cell proliferation and increase IL2 production. {ECO:0000269|PubMed:11571281, ECO:0000269|PubMed:12604780}.	FAP48;GLML;GVM;FKBPAP;VMGLOM	glomulin, FKBP associated protein
Q96KQ7	EHMT2	11	-0.45	-0.74	-0.15	-0.67	-1.02	-0.18	NA	NA	NA
Q96KR1	ZFR	22	-0.45	-0.2	-0.68	-1.48	-2.1	-0.67	NA	NA	NA
Q9BTT4	MED10	3	-0.45	-0.05	-0.9	0.05	-0.13	0.32	Component of the Mediator complex, a coactivator involved in the regulated transcription of nearly all RNA polymerase II-dependent genes. Mediator functions as a bridge to convey information from gene-specific regulatory proteins to the basal RNA polymerase II transcription machinery. Mediator is recruited to promoters by direct interactions with regulatory proteins and serves as a scaffold for t…	TRG20;L6;MGC5309;NUT2	mediator complex subunit 10
Q9BXW9	FANCD2	16	-0.45	-1.4	0.52	0.61	0.83	-0.4	Required for maintenance of chromosomal stability. Promotes accurate and efficient pairing of homologs during meiosis. Involved in the repair of DNA double-strand breaks, both by homologous recombination and single-strand annealing. May participate in S phase and G2 phase checkpoint activation upon DNA damage. Plays a role in preventing breakage and loss of missegregating chromatin at the end of …	FAD;FA-D2;FACD;FANCD	FA complementation group D2
Q9H974	QTRT2	6	-0.45	-0.13	-0.77	-0.4	0.42	-0.66	Non-catalytic subunit of the queuine tRNA- ribosyltransferase (TGT) that catalyzes the base-exchange of a guanine (G) residue with queuine (Q) at position 34 (anticodon wobble position) in tRNAs with GU(N) anticodons (tRNA-Asp, -Asn, -His and -Tyr), resulting in the hypermodified nucleoside queuosine (7-(((4,5-cis-dihydroxy-2-cyclopenten-1- yl)amino)methyl)-7-deazaguanosine). {ECO:0000255|HAMAP- …	FLJ12960;QTRTD1	queuine tRNA-ribosyltransferase accessory subunit 2
Q9NW64	RBM22	10	-0.45	-0.42	-0.48	-0.12	-0.2	-0.1	Involved in the first step of pre-mRNA splicing. Binds directly to the internal stem-loop (ISL) domain of the U6 snRNA and to the pre-mRNA intron near the 5' splice site during the activation and catalytic phases of the spliceosome cycle. Involved in both translocations of the nuclear SLU7 to the cytoplasm and the cytosolic calcium-binding protein PDCD6 to the nucleus upon cellular stress respons…	FLJ10290;ZC3H16;fSAP47;Cwc2	RNA binding motif protein 22
Q9UGV2	NDRG3	7	-0.45	-1.06	-0.01	0.45	0.49	0.35	NA	NA	NA
Q9Y5P6	GMPPB	9	-0.45	-0.51	-0.4	0.1	0.49	-0.3	Catalyzes the formation of GDP-mannose, an essential precursor of glycan moieties of glycoproteins and glycolipids. {ECO:0000250|UniProtKB:P0C5I2}.	KIAA1851	GDP-mannose pyrophosphorylase B
O95571	ETHE1	10	-0.44	1.41	-2	-0.2	-0.51	0.16	Sulfur dioxygenase that plays an essential role in hydrogen sulfide catabolism in the mitochondrial matrix. Hydrogen sulfide (H(2)S) is first oxidized by SQRDL, giving rise to cysteine persulfide residues. ETHE1 consumes molecular oxygen to catalyze the oxidation of the persulfide, once it has been transferred to a thiophilic acceptor, such as glutathione (R-SSH). Plays an important role in metab…	YF13H12;HSCO	ETHE1, persulfide dioxygenase
P13693	TPT1	17	-0.44	-0.37	-0.52	-0.05	-0.11	0.05	Involved in calcium binding and microtubule stabilization.	TCTP;fortilin	tumor protein, translationally-controlled 1
P16150	SPN	3	-0.44	-0.34	-0.52	0.07	0.05	0.19	Predominant cell surface sialoprotein of leukocytes which regulates multiple T-cell functions, including T-cell activation, proliferation, differentiation, trafficking and migration. Positively regulates T-cell trafficking to lymph-nodes via its association with ERM proteins (EZR, RDX and MSN) (By similarity). Negatively regulates Th2 cell differentiation and predisposes the differentiation of T-…	LSN;CD43;GPL115	sialophorin
P31153	MAT2A	17	-0.44	-0.38	-0.48	-0.09	0.23	-0.57	Catalyzes the formation of S-adenosylmethionine from methionine and ATP. The reaction comprises two steps that are both catalyzed by the same enzyme: formation of S-adenosylmethionine (AdoMet) and triphosphate, and subsequent hydrolysis of the triphosphate. {ECO:0000269|PubMed:10644686, ECO:0000269|PubMed:23189196, ECO:0000269|PubMed:25075345}.	SAMS2;MATA2;MATII	methionine adenosyltransferase 2A
Q01469	FABP5	28	-0.44	-0.55	-0.36	0.37	0.49	0.26	High specificity for fatty acids. Highest affinity for C18 chain length. Decreasing the chain length or introducing double bonds reduces the affinity. May be involved in keratinocyte differentiation.	E-FABP;PA-FABP;KFABP	fatty acid binding protein 5
Q13616	CUL1	22	-0.44	-0.57	-0.25	-0.27	-0.24	-0.55	Core component of multiple cullin-RING-based SCF (SKP1- CUL1-F-box protein) E3 ubiquitin-protein ligase complexes, which mediate the ubiquitination of proteins involved in cell cycle progression, signal transduction and transcription. SCF complexes and ARIH1 collaborate in tandem to mediate ubiquitination of target proteins (PubMed:27565346). In the SCF complex, serves as a rigid scaffold that or…	NA	cullin 1
Q15751	HERC1	17	-0.44	0.33	-1.38	-0.74	-1.88	0.43	Involved in membrane trafficking via some guanine nucleotide exchange factor (GEF) activity and its ability to bind clathrin. Acts as a GEF for Arf and Rab, by exchanging bound GDP for free GTP. Binds phosphatidylinositol 4,5-bisphosphate, which is required for GEF activity. May also act as a E3 ubiquitin- protein ligase which accepts ubiquitin from an E2 ubiquitin- conjugating enzyme in the form…	p532;p619	HECT and RLD domain containing E3 ubiquitin protein ligase family member 1
Q92572	AP3S1	5	-0.44	-0.54	-0.22	0.49	0.65	0.18	Part of the AP-3 complex, an adaptor-related complex which is not clathrin-associated. The complex is associated with the Golgi region as well as more peripheral structures. It facilitates the budding of vesicles from the Golgi membrane and may be directly involved in trafficking to lysosomes. In concert with the BLOC-1 complex, AP-3 is required to target cargos into vesicles assembled at cell bo…	CLAPS3	adaptor related protein complex 3 subunit sigma 1
Q92820	GGH	7	-0.44	-0.64	0	-1.76	-0.19	-2.92	Hydrolyzes the polyglutamate sidechains of pteroylpolyglutamates. Progressively removes gamma-glutamyl residues from pteroylpoly-gamma-glutamate to yield pteroyl-alpha- glutamate (folic acid) and free glutamate. May play an important role in the bioavailability of dietary pteroylpolyglutamates and in the metabolism of pteroylpolyglutamates and antifolates.	NA	gamma-glutamyl hydrolase
Q99633	PRPF18	6	-0.44	-0.5	-0.36	0.41	0.14	0.81	Participates in the second step of pre-mRNA splicing. {ECO:0000269|PubMed:9000057}.	hPrp18	pre-mRNA processing factor 18
Q9BWM7	SFXN3	6	-0.44	-6.17	3.39	-0.71	-1.93	-0.02	Potential iron transporter.	SFX3;SLC56A3	sideroflexin 3
Q9H0A8	COMMD4	3	-0.44	-0.06	-0.82	0.09	0.12	0.02	May modulate activity of cullin-RING E3 ubiquitin ligase (CRL) complexes (PubMed:21778237). Down-regulates activation of NF-kappa-B. {ECO:0000269|PubMed:15799966, ECO:0000305|PubMed:21778237}.	FLJ20452	COMM domain containing 4
Q9P275	USP36	6	-0.44	-0.71	-0.09	-0.09	-0.38	0.28	May be required for maintaining multiple types of adult stem cells. May function as a transcriptional repressor by continually deubiquiting histone H2B at the promoters of genes critical for cellular differentiation, thereby preventing histone H3 'Lys-4' trimethylation (H3K4) (By similarity). {ECO:0000250}.	KIAA1453;FLJ12851	ubiquitin specific peptidase 36
Q9UJX3	ANAPC7	12	-0.44	-0.53	-0.39	0.04	0.14	0	Component of the anaphase promoting complex/cyclosome (APC/C), a cell cycle-regulated E3 ubiquitin ligase that controls progression through mitosis and the G1 phase of the cell cycle. The APC/C complex acts by mediating ubiquitination and subsequent degradation of target proteins: it mainly mediates the formation of 'Lys-11'-linked polyubiquitin chains and, to a lower extent, the formation of 'Ly…	APC7	anaphase promoting complex subunit 7
Q9Y3U8	RPL36	8	-0.44	-0.63	-0.3	0.2	0.39	-0.04	Component of the large ribosomal subunit. {ECO:0000269|PubMed:23636399, ECO:0000269|PubMed:25901680, ECO:0000269|PubMed:25957688, ECO:0000305|PubMed:12962325}.	DKFZp566B023;L36	ribosomal protein L36
A4D1E9	GTPBP10	3	-0.43	-2.29	1.4	-0.94	-0.54	-1.6	NA	NA	NA
P04040	CAT	41	-0.43	-0.14	-0.69	-0.01	-0.07	-0.08	Occurs in almost all aerobically respiring organisms and serves to protect cells from the toxic effects of hydrogen peroxide. Promotes growth of cells including T-cells, B-cells, myeloid leukemia cells, melanoma cells, mastocytoma cells and normal and transformed fibroblast cells. {ECO:0000269|PubMed:7882369}.	NA	catalase
P34896	SHMT1	14	-0.43	0.14	-1.08	-1.45	-1.33	-1.38	Interconversion of serine and glycine (PubMed:8505317, PubMed:24698160). {ECO:0000269|PubMed:24698160, ECO:0000269|PubMed:8505317}.	CSHMT;SHMT;MGC15229;MGC24556	serine hydroxymethyltransferase 1
P55081	MFAP1	5	-0.43	-0.46	-0.39	0.21	0.51	-0.35	May be required for pre-mRNA splicing. {ECO:0000250|UniProtKB:Q9W062}.	AMP	microfibril associated protein 1
P61289	PSME3	20	-0.43	-1.09	-0.05	-0.31	-0.43	-0.01	Subunit of the 11S REG-gamma (also called PA28-gamma) proteasome regulator, a doughnut-shaped homoheptamer which associates with the proteasome. 11S REG-gamma activates the trypsin-like catalytic subunit of the proteasome but inhibits the chymotrypsin-like and postglutamyl-preferring (PGPH) subunits. Facilitates the MDM2-p53/TP53 interaction which promotes ubiquitination- and MDM2-dependent prote…	Ki;PA28-gamma;REG-GAMMA;PA28G	proteasome activator subunit 3
Q13423	NNT	44	-0.43	-0.49	-0.37	-0.36	-0.43	-0.3	The transhydrogenation between NADH and NADP is coupled to respiration and ATP hydrolysis and functions as a proton pump across the membrane. May play a role in reactive oxygen species (ROS) detoxification in the adrenal gland. {ECO:0000269|PubMed:22634753}.	NA	nicotinamide nucleotide transhydrogenase
Q13523	PRPF4B	24	-0.43	0.23	-1.18	-0.38	0.31	-1.59	Has a role in pre-mRNA splicing. Phosphorylates SF2/ASF.	Prp4;PR4H;KIAA0536	pre-mRNA processing factor 4B
Q15532	SS18	3	-0.43	-0.36	-0.34	-0.44	-0.23	-1.27	Appears to function synergistically with RBM14 as a transcriptional coactivator. Isoform 1 and isoform 2 function in nuclear receptor coactivation. Isoform 1 and isoform 2 function in general transcriptional coactivation. {ECO:0000269|PubMed:15919756}.	SYT;SSXT	SS18, nBAF chromatin remodeling complex subunit
Q562R1	ACTBL2	7	-0.43	0.67	-1.5	-0.29	-0.54	0.23	Actins are highly conserved proteins that are involved in various types of cell motility and are ubiquitously expressed in all eukaryotic cells. {ECO:0000250}.	DKFZp686D0972	actin, beta like 2
Q8WU76	SCFD2	5	-0.43	-0.63	-0.16	0.3	0.37	0.15	May be involved in protein transport.	STXBP1L1;FLJ39514	sec1 family domain containing 2
Q92626	PXDN	13	-0.43	-0.24	-0.6	0.55	0.55	0.5	Displays low peroxidase activity and is likely to participate in H(2)O(2) metabolism and peroxidative reactions in the cardiovascular system. Plays a role in extracellular matrix formation. {ECO:0000269|PubMed:18929642, ECO:0000269|PubMed:19590037}.	KIAA0230;PRG2;MG50;D2S448;D2S448E;PXN	peroxidasin
Q96JM3	CHAMP1	18	-0.43	-0.75	-0.02	0.03	-0.06	0.23	Required for proper alignment of chromosomes at metaphase and their accurate segregation during mitosis. Involved in the maintenance of spindle microtubules attachment to the kinetochore during sister chromatid biorientation. May recruit CENPE and CENPF to the kinetochore. {ECO:0000269|PubMed:21063390}.	CAMP;CHAMP;C13orf8;ZNF828	chromosome alignment maintaining phosphoprotein 1
Q9BV44	THUMPD3	4	-0.43	-0.57	-0.29	-0.22	-0.12	-0.41	NA	DKFZP434F091	THUMP domain containing 3
Q9BW71	HIRIP3	7	-0.43	-0.97	-0.11	0.35	0.25	0.58	May play a role in chromatin function and histone metabolism via its interaction with HIRA and histones. {ECO:0000269|PubMed:9710638}.	NA	HIRA interacting protein 3
Q9P000	COMMD9	4	-0.43	0.61	-2.67	-3.66	-17.99	-1.54	May modulate activity of cullin-RING E3 ubiquitin ligase (CRL) complexes (PubMed:21778237). May down-regulate activation of NF-kappa-B (PubMed:15799966). Modulates Na(+) transport in epithelial cells by regulation of apical cell surface expression of amiloride-sensitive sodium channel (ENaC) subunits (PubMed:23637203). {ECO:0000269|PubMed:15799966, ECO:0000269|PubMed:23637203, ECO:0000305|PubMed:…	HSPC166;FLJ31106	COMM domain containing 9
Q9Y2Q0	ATP8A1	7	-0.43	-1.75	0.24	0.2	1.88	-4.16	Catalytic component of a P4-ATPase flippase complex which catalyzes the hydrolysis of ATP coupled to the transport of aminophospholipids from the outer to the inner leaflet of various membranes and ensures the maintenance of asymmetric distribution of phospholipids. Phospholipid translocation seems also to be implicated in vesicle formation and in uptake of lipid signaling molecules. In vitro, it…	ATPIA	ATPase phospholipid transporting 8A1
O00410	IPO5	66	-0.42	-0.3	-0.53	-0.14	-0.2	-0.04	Functions in nuclear protein import as nuclear transport receptor. Serves as receptor for nuclear localization signals (NLS) in cargo substrates. Is thought to mediate docking of the importin/substrate complex to the nuclear pore complex (NPC) through binding to nucleoporin and the complex is subsequently translocated through the pore by an energy requiring, Ran- dependent mechanism. At the nucle…	IMB3;MGC2068;Pse1;KPNB3;RANBP5	importin 5
O60701	UGDH	18	-0.42	-0.26	-0.56	-0.18	0.04	-0.56	Involved in the biosynthesis of glycosaminoglycans; hyaluronan, chondroitin sulfate, and heparan sulfate.	NA	UDP-glucose 6-dehydrogenase
O75449	KATNA1	5	-0.42	-0.91	-0.11	-0.35	-0.46	-0.94	Catalytic subunit of a complex which severs microtubules in an ATP-dependent manner. Microtubule severing may promote rapid reorganization of cellular microtubule arrays and the release of microtubules from the centrosome following nucleation. Microtubule release from the mitotic spindle poles may allow depolymerization of the microtubule end proximal to the spindle pole, leading to poleward micr…	NA	katanin catalytic subunit A1
O75530	EED	12	-0.42	-0.53	0.45	1.17	0.89	1.35	Polycomb group (PcG) protein. Component of the PRC2/EED- EZH2 complex, which methylates 'Lys-9' and 'Lys-27' of histone H3, leading to transcriptional repression of the affected target gene. Also recognizes 'Lys-26' trimethylated histone H1 with the effect of inhibiting PRC2 complex methyltransferase activity on nucleosomal histone H3 'Lys-27', whereas H3 'Lys-27' recognition has the opposite eff…	WAIT-1;HEED	embryonic ectoderm development
P12694	BCKDHA	10	-0.42	-0.68	-0.29	0	0.04	0	The branched-chain alpha-keto dehydrogenase complex catalyzes the overall conversion of alpha-keto acids to acyl-CoA and CO(2). It contains multiple copies of three enzymatic components: branched-chain alpha-keto acid decarboxylase (E1), lipoamide acyltransferase (E2) and lipoamide dehydrogenase (E3).	MSU;OVD1A	branched chain keto acid dehydrogenase E1, alpha polypeptide
P16403	H1-2	5	-0.42	-0.03	-0.82	-0.13	-0.25	-1.24	Histone H1 protein binds to linker DNA between nucleosomes forming the macromolecular structure known as the chromatin fiber. Histones H1 are necessary for the condensation of nucleosome chains into higher-order structured fibers. Acts also as a regulator of individual gene transcription through chromatin remodeling, nucleosome spacing and DNA methylation (By similarity). {ECO:0000250}.	H1.2;H1s-1;H1c;H1F2	histone cluster 1 H1 family member c
P17844	DDX5	61	-0.42	-0.63	-0.21	0.21	0.16	0.19	Involved in the alternative regulation of pre-mRNA splicing; its RNA helicase activity is necessary for increasing tau exon 10 inclusion and occurs in a RBM4-dependent manner. Binds to the tau pre-mRNA in the stem-loop region downstream of exon 10. The rate of ATP hydrolysis is highly stimulated by single-stranded RNA. Involved in transcriptional regulation; the function is independent of the RNA…	p68;HLR1;G17P1	DEAD-box helicase 5
P32189	GK	3	-0.42	-2.91	0.66	-0.53	0.26	-1.78	Key enzyme in the regulation of glycerol uptake and metabolism.	GK1;GKD	glycerol kinase
P34932	HSPA4	71	-0.42	0.71	-2.53	0.88	1.77	0.47	NA	HS24/P52;HSPH2	heat shock protein family A (Hsp70) member 4
P38919	EIF4A3	49	-0.42	-0.37	-0.47	-0.06	-0.03	-0.13	ATP-dependent RNA helicase. Core component of the splicing-dependent multiprotein exon junction complex (EJC) deposited at splice junctions on mRNAs. The EJC is a dynamic structure consisting of core proteins and several peripheral nuclear and cytoplasmic associated factors that join the complex only transiently either during EJC assembly or during subsequent mRNA metabolism. The EJC marks the po…	KIAA0111;EIF4AIII;Fal1;DDX48	eukaryotic translation initiation factor 4A3
P62829	RPL23	18	-0.42	-0.26	-0.57	-0.02	-0.66	0.88	NA	rpL17;L23	ribosomal protein L23
P82979	SARNP	8	-0.42	-0.24	-0.61	-0.2	-0.3	-0.03	Binds both single-stranded and double-stranded DNA with higher affinity for the single-stranded form. Specifically binds to scaffold/matrix attachment region DNA. Also binds single- stranded RNA. Enhances RNA unwinding activity of DDX39A. May participate in important transcriptional or translational control of cell growth, metabolism and carcinogenesis. Component of the TREX complex which is thou…	THO1;Hcc-1;CIP29	SAP domain containing ribonucleoprotein
Q00341	HDLBP	44	-0.42	-0.19	-0.64	-0.07	-0.07	-0.18	Appears to play a role in cell sterol metabolism. It may function to protect cells from over-accumulation of cholesterol.	HBP;VGL	high density lipoprotein binding protein
Q14240	EIF4A2	17	-0.42	-0.69	-0.26	0.17	0.25	0.18	ATP-dependent RNA helicase which is a subunit of the eIF4F complex involved in cap recognition and is required for mRNA binding to ribosome. In the current model of translation initiation, eIF4A unwinds RNA secondary structures in the 5'-UTR of mRNAs which is necessary to allow efficient binding of the small ribosomal subunit, and subsequent scanning for the initiator codon.	DDX2B;EIF4A;BM-010;EIF4F	eukaryotic translation initiation factor 4A2
Q14978	NOLC1	38	-0.42	-0.71	-0.07	-0.14	0.04	-0.47	Nucleolar protein that acts as a regulator of RNA polymerase I by connecting RNA polymerase I with enzymes responsible for ribosomal processing and modification (PubMed:10567578, PubMed:26399832). Required for neural crest specification: following monoubiquitination by the BCR(KBTBD8) complex, associates with TCOF1 and acts as a platform to connect RNA polymerase I with enzymes responsible for ri…	P130;KIAA0035;NOPP140;NOPP130	nucleolar and coiled-body phosphoprotein 1
Q15149	PLEC	61	-0.42	-1.59	0.02	0.12	0	0.46	NA	NA	NA
Q6IBW4	NCAPH2	4	-0.42	0.13	-0.76	0.33	0.12	0.66	NA	NA	NA
Q8IXB1	DNAJC10	7	-0.42	-0.11	-0.72	-0.74	-0.33	-1.01	NA	NA	NA
Q8TB03	CXorf38	5	-0.42	0.07	-0.91	-0.77	-0.59	-1.05	NA	MGC39350	chromosome X open reading frame 38
Q92797	SYMPK	41	-0.42	-0.1	-0.75	0.27	0.4	-0.01	Scaffold protein that functions as a component of a multimolecular complex involved in histone mRNA 3'-end processing. Specific component of the tight junction (TJ) plaque, but might not be an exclusively junctional component. May have a house- keeping rule. Is involved in pre-mRNA polyadenylation. Enhances SSU72 phosphatase activity. {ECO:0000269|PubMed:16230528, ECO:0000269|PubMed:20861839}.	SYM;SPK	symplekin
Q96SL4	GPX7	4	-0.42	-0.33	-0.47	0.36	0.07	0.81	It protects esophageal epithelia from hydrogen peroxide- induced oxidative stress. It suppresses acidic bile acid-induced reactive oxigen species (ROS) and protects against oxidative DNA damage and double-strand breaks. {ECO:0000269|PubMed:22157330}.	FLJ14777;GPX6;NPGPx	glutathione peroxidase 7
Q9H6R4	NOL6	20	-0.42	-0.66	-0.11	0.53	0.57	0.08	NA	NA	NA
Q9NS69	TOMM22	4	-0.42	-0.16	-0.67	-0.06	-0.35	0.23	Central receptor component of the translocase of the outer membrane of mitochondria (TOM complex) responsible for the recognition and translocation of cytosolically synthesized mitochondrial preproteins. Together with the peripheral receptor TOM20 functions as the transit peptide receptor and facilitates the movement of preproteins into the translocation pore. {ECO:0000269|PubMed:10982837}.	TOM22	translocase of outer mitochondrial membrane 22
Q9NZM5	NOP53	12	-0.42	-0.69	-0.25	0.22	0.16	0.25	Nucleolar protein which is involved in the integration of the 5S RNP into the ribosomal large subunit during ribosome biogenesis (PubMed:24120868). In ribosome biogenesis, may also play a role in rRNA transcription (PubMed:27729611). Also functions as a nucleolar sensor that regulates the activation of p53/TP53 in response to ribosome biogenesis perturbation, DNA damage and other stress condition…	PICT-1;PICT1;GLTSCR2	NOP53 ribosome biogenesis factor
O00505	KPNA3	10	-0.41	0.05	-1.03	-0.16	-0.04	-0.54	Functions in nuclear protein import as an adapter protein for nuclear receptor KPNB1. Binds specifically and directly to substrates containing either a simple or bipartite NLS motif. Docking of the importin/substrate complex to the nuclear pore complex (NPC) is mediated by KPNB1 through binding to nucleoporin FxFG repeats and the complex is subsequently translocated through the pore by an energy …	SRP1gamma;SRP4;hSRP1;IPOA4	karyopherin subunit alpha 3
O15371	EIF3D	20	-0.41	-0.25	-0.54	-0.2	-0.22	-0.2	mRNA cap-binding component of the eukaryotic translation initiation factor 3 (eIF-3) complex, a complex required for several steps in the initiation of protein synthesis of a specialized repertoire of mRNAs (PubMed:27462815). The eIF-3 complex associates with the 40S ribosome and facilitates the recruitment of eIF-1, eIF-1A, eIF-2:GTP:methionyl-tRNAi and eIF-5 to form the 43S pre-initiation compl…	eIF3-p66;eIF3-zeta;eIF3d;EIF3S7	eukaryotic translation initiation factor 3 subunit D
O75351	VPS4B	17	-0.41	-0.6	-0.43	-0.15	-0.39	0.15	Involved in late steps of the endosomal multivesicular bodies (MVB) pathway. Recognizes membrane-associated ESCRT-III assemblies and catalyzes their disassembly, possibly in combination with membrane fission. Redistributes the ESCRT-III components to the cytoplasm for further rounds of MVB sorting. MVBs contain intraluminal vesicles (ILVs) that are generated by invagination and scission from the …	VPS4-2;SKD1B;SKD1	vacuolar protein sorting 4 homolog B
O75818	RPP40	3	-0.41	-0.59	-0.43	2.7	2.5	2.73	Component of ribonuclease P, a protein complex that generates mature tRNA molecules by cleaving their 5'-ends.	bA428J1.3;RNASEP1	ribonuclease P/MRP subunit p40
O95139	NDUFB6	3	-0.41	-0.23	-0.58	-0.08	0.02	-0.38	Accessory subunit of the mitochondrial membrane respiratory chain NADH dehydrogenase (Complex I), that is believed not to be involved in catalysis. Complex I functions in the transfer of electrons from NADH to the respiratory chain. The immediate electron acceptor for the enzyme is believed to be ubiquinone. {ECO:0000269|PubMed:27626371}.	B17;CI	NADH:ubiquinone oxidoreductase subunit B6
P04233	CD74	17	-0.41	-0.53	-0.16	0.36	0.53	-0.03	NA	NA	NA
P35573	AGL	39	-0.41	-0.36	-0.42	-0.2	-0.07	-0.39	NA	NA	NA
Q04837	SSBP1	6	-0.41	-0.56	-0.16	-0.66	-0.57	-0.82	This protein binds preferentially and cooperatively to ss-DNA. Probably involved in mitochondrial DNA replication. Associates with mitochondrial DNA.	SSBP;mtSSB	single stranded DNA binding protein 1
Q14738	PPP2R5D	5	-0.41	-0.61	-0.19	0.2	0.01	0.45	The B regulatory subunit might modulate substrate selectivity and catalytic activity, and also might direct the localization of the catalytic enzyme to a particular subcellular compartment.	B56D;B56delta	protein phosphatase 2 regulatory subunit B'delta
Q15276	RABEP1	18	-0.41	-0.16	-0.65	-0.25	-0.75	0.56	Rab effector protein acting as linker between gamma- adaptin, RAB4A and RAB5A. Involved in endocytic membrane fusion and membrane trafficking of recycling endosomes. Involved in KCNH1 channels trafficking to and from the cell membrane (PubMed:22841712). Stimulates RABGEF1 mediated nucleotide exchange on RAB5A. {ECO:0000269|PubMed:10698684, ECO:0000269|PubMed:11452015, ECO:0000269|PubMed:12773381,…	neurocrescin;RAB5EP;RABPT5;rabaptin-5	rabaptin, RAB GTPase binding effector protein 1
Q16774	GUK1	6	-0.41	-0.04	-0.81	-0.59	-0.78	-0.3	Essential for recycling GMP and indirectly, cGMP.	NA	guanylate kinase 1
Q5VYS8	TUT7	3	-0.41	-0.32	-0.07	-1.14	-1.62	-0.34	NA	NA	NA
Q66K14	TBC1D9B	6	-0.41	0.3	-1.73	-0.42	-1.13	0.98	May act as a GTPase-activating protein for Rab family protein(s).	KIAA0676;GRAMD9B	TBC1 domain family member 9B
Q96ME1	FBXL18	5	-0.41	-0.11	-0.71	-0.33	-0.38	-0.55	NA	NA	NA
Q9UBC2	EPS15L1	5	-0.41	-0.28	-0.51	0.21	0.17	0.07	Seems to be a constitutive component of clathrin-coated pits that is required for receptor-mediated endocytosis. Involved in endocytosis of integrin beta-1 (ITGB1) and transferrin receptor (TFR); internalization of ITGB1 as DAB2-dependent cargo but not TFR seems to require association with DAB2. {ECO:0000269|PubMed:22648170, ECO:0000269|PubMed:9407958}.	eps15R	epidermal growth factor receptor pathway substrate 15 like 1
Q9UEY8	ADD3	4	-0.41	-0.04	-0.79	0.67	0.47	0.99	Membrane-cytoskeleton-associated protein that promotes the assembly of the spectrin-actin network. Plays a role in actin filament capping (PubMed:23836506). Binds to calmodulin. {ECO:0000269|PubMed:23836506}.	ADDL	adducin 3
Q9UHD1	CHORDC1	15	-0.41	-1.37	0.04	0	0.02	-0.02	Regulates centrosome duplication, probably by inhibiting the kinase activity of ROCK2. Proposed to act as co-chaperone for HSP90. May play a role in the regulation of NOD1 via a HSP90 chaperone complex. In vitro, has intrinsic chaperone activity. This function may be achieved by inhibiting association of ROCK2 with NPM1. Involved in stress response. Prevents tumorigenesis. {ECO:0000269|PubMed:202…	CHP1;CHP-1	cysteine and histidine rich domain containing 1
Q9Y450	HBS1L	12	-0.41	-0.31	-0.49	0.7	0.14	1.96	NA	ERFS;HBS1;HSPC276;KIAA1038;DKFZp434g247;EF-1a;eRF3c	HBS1 like translational GTPase
Q9Y6C9	MTCH2	13	-0.41	-0.72	-0.06	0.31	-0.13	1.01	The substrate transported is not yet known. Induces mitochondrial depolarization.	SLC25A50	mitochondrial carrier 2
O43149	ZZEF1	17	-0.4	-0.32	-0.47	-0.28	-0.2	-0.36	NA	KIAA0399;ZZZ4;FLJ10821	zinc finger ZZ-type and EF-hand domain containing 1
O43422	THAP12	3	-0.4	-0.93	0.03	-0.58	-0.67	-0.45	Upstream regulator of interferon-induced serine/threonine protein kinase R (PKR). May block the PKR- inhibitory function of DNAJC3, resulting in restoration of kinase activity and suppression of cell growth.	P52rIPK;DAP4;THAP0;PRKRIR	THAP domain containing 12
O95347	SMC2	77	-0.4	-0.72	-0.15	0.01	0.1	-0.06	Central component of the condensin complex, a complex required for conversion of interphase chromatin into mitotic-like condense chromosomes. The condensin complex probably introduces positive supercoils into relaxed DNA in the presence of type I topoisomerases and converts nicked DNA into positive knotted forms in the presence of type II topoisomerases. {ECO:0000269|PubMed:11136719}.	hCAP-E;CAP-E;SMC2L1	structural maintenance of chromosomes 2
O95613	PCNT	9	-0.4	-0.79	-0.14	0.26	0.26	0.04	Integral component of the filamentous matrix of the centrosome involved in the initial establishment of organized microtubule arrays in both mitosis and meiosis. Plays a role, together with DISC1, in the microtubule network formation. Is an integral component of the pericentriolar material (PCM). May play an important role in preventing premature centrosome splitting during interphase by inhibiti…	KEN;KIAA0402;PCN;PCNTB;SCKL4;PCNT2	pericentrin
P29083	GTF2E1	5	-0.4	-2.15	1.53	-1.45	-0.02	-1.84	Recruits TFIIH to the initiation complex and stimulates the RNA polymerase II C-terminal domain kinase and DNA-dependent ATPase activities of TFIIH. Both TFIIH and TFIIE are required for promoter clearance by RNA polymerase.	TFIIE-A;FE	general transcription factor IIE subunit 1
P29692	EEF1D	23	-0.4	-1.04	-0.05	-0.09	-0.03	-0.18	Isoform 1: EF-1-beta and EF-1-delta stimulate the exchange of GDP bound to EF-1-alpha to GTP, regenerating EF-1- alpha for another round of transfer of aminoacyl-tRNAs to the ribosome.	EF-1D;FLJ20897	eukaryotic translation elongation factor 1 delta
P61224	RAP1B	4	-0.4	-0.66	-0.05	-1.1	-1.18	-1.05	NA	NA	NA
P62244	RPS15A	25	-0.4	-0.44	-0.37	0	0.06	-0.26	NA	S15A	ribosomal protein S15a
Q14807	KIF22	23	-0.4	-0.57	-0.28	-0.25	-0.4	-0.17	Kinesin family member that is involved in spindle formation and the movements of chromosomes during mitosis and meiosis. Binds to microtubules and to DNA (By similarity). Plays a role in congression of laterally attached chromosomes in NDC80- depleted cells (PubMed:25743205). {ECO:0000250|UniProtKB:Q9I869, ECO:0000269|PubMed:25743205}.	Kid;OBP-1;OBP-2;KNSL4	kinesin family member 22
Q15021	NCAPD2	36	-0.4	-0.15	-0.63	-0.18	-0.05	-0.49	Regulatory subunit of the condensin complex, a complex required for conversion of interphase chromatin into mitotic-like condense chromosomes. The condensin complex probably introduces positive supercoils into relaxed DNA in the presence of type I topoisomerases and converts nicked DNA into positive knotted forms in the presence of type II topoisomerases. May target the condensin complex to DNA v…	CNAP1;hCAP-D2;CAP-D2;KIAA0159	non-SMC condensin I complex subunit D2
Q15118	PDK1	3	-0.4	-2.61	0	1.2	0.9	1.5	Kinase that plays a key role in regulation of glucose and fatty acid metabolism and homeostasis via phosphorylation of the pyruvate dehydrogenase subunits PDHA1 and PDHA2. This inhibits pyruvate dehydrogenase activity, and thereby regulates metabolite flux through the tricarboxylic acid cycle, down-regulates aerobic respiration and inhibits the formation of acetyl-coenzyme A from pyruvate. Plays …	NA	pyruvate dehydrogenase kinase 1
Q15291	RBBP5	13	-0.4	-0.16	-0.62	-0.32	-0.4	-0.18	In embryonic stem (ES) cells, plays a crucial role in the differentiation potential, particularly along the neural lineage, regulating gene induction and H3 'Lys-4' methylation at key developmental loci, including that mediated by retinoic acid (By similarity). As part of the MLL1/MLL complex, involved in mono-, di- and trimethylation at 'Lys-4' of histone H3. Histone H3 'Lys-4' methylation repre…	RBQ3;SWD1	RB binding protein 5, histone lysine methyltransferase complex subunit
Q6IPR3	TYW3	5	-0.4	0.75	-3.82	-0.96	-1.31	-0.84	Probable S-adenosyl-L-methionine-dependent methyltransferase that acts as a component of the wybutosine biosynthesis pathway. Wybutosine is a hyper modified guanosine with a tricyclic base found at the 3'-position adjacent to the anticodon of eukaryotic phenylalanine tRNA (By similarity). {ECO:0000250}.	FLJ40918;C1orf171	tRNA-yW synthesizing protein 3 homolog
Q6XQN6	NAPRT	12	-0.4	0.06	-0.79	0.42	0.61	0.2	Catalyzes the conversion of nicotinic acid (NA) to NA mononucleotide (NaMN). Essential for NA to increase cellular NAD levels and prevent oxidative stress of the cells. {ECO:0000269|PubMed:17604275}.	PP3856;NAPRT1	nicotinate phosphoribosyltransferase
Q8WXF1	PSPC1	22	-0.4	-0.47	-0.31	0.1	-0.3	0.74	Regulates, cooperatively with NONO and SFPQ, androgen receptor-mediated gene transcription activity in Sertoli cell line (By similarity). Binds to poly(A), poly(G) and poly(U) RNA homopolymers. Regulates the circadian clock by repressing the transcriptional activator activity of the CLOCK-ARNTL/BMAL1 heterodimer (By similarity). Together with NONO, required for the formation of nuclear paraspeckl…	PSP1;FLJ10955	paraspeckle component 1
[truncated: 3,088 more rows]

## Sheet: NALM6-log2-abundance-values
Uniprot ID	Unique peptides detected	WT Untreated replicate 1 log2 abundance	WT Untreated replicate 2 log2 abundance	WT ONC212-treated replicate 1 log2 abundance	WT ONC212-treated replicate 2 log2 abundance	CLPP sh untreated replicate 1 log2 abundance	CLPP sh untreated replicate 2 log2 abundance	CLPP sh ONC212-treated replicate 1 log2 abundance	CLPP sh ONC212-treated replicate 2 log2 abundance
[truncated: 6,782 more rows]
